1 **Title page**

**June 26, 2019**

2

3 **Motor cortex can directly drive the globus pallidal neurons in a projection**  
4 **neuron type dependent manner in rat**

5

6 Fuyuki Karube<sup>1\*</sup>, Susumu Takahashi<sup>1,2</sup>, Kenta Kobayashi<sup>3</sup>, and Fumino Fujiyama<sup>1\*</sup>

7

8 <sup>1</sup> Laboratory of Neural Circuitry, Graduate School of Brain Science, Doshisha University

9 Kyotanabe 610-0394, Japan

10 <sup>2</sup> Laboratory of Cognitive and Behavioral Neuroscience, Graduate School of Brain Science,

11 Doshisha University

12 Kyotanabe 610-0394, Japan (Current address)

13 <sup>3</sup> Section of Viral Vector Development, National Institute for Physiological Sciences

14 Okazaki 444-8585, Japan

15

16 **\*Correspondence to:** Associate Prof. Fuyuki Karube and Prof. Fumino Fujiyama

17 Laboratory of Neural Circuitry

18 Graduate School of Brain Science, Doshisha University

19 Kyotanabe 610-0394, JAPAN

20 Tel: 81-774-65-7381 (Japan)

21 Fax: 81-774-73-1931

22 E-mail: fkarube@mail.doshisha.ac.jp

23 ffujiyam@mail.doshisha.ac.jp

24

25 **Author contributions**

26 FK designed and performed all experiments and analyzed the data. KK prepared the viral vectors.

27 FK, ST, and FF contributed reagents, experimental devices, and tools. FK, ST, and FF wrote the

28 manuscript.

29

30 **Declarations of interest**

31 The authors declare no competing financial interests.

32

33 **Short title:** A cell type-dependent cortico-pallidal pathway

34

35 **Key words:** cerebral cortex, globus pallidus, striatum, subthalamic nucleus, projection

36

37 **Number of tables:** 1

38

39 **Number of figures:** 10 figures and 4 figure-figure supplements.

40

41 **Number of supplementary materials:** 2 supplementary tables and 2 supplementary figures.

42

43 **Acknowledgement:** The authors thank Dr. Yasuharu Hirai for discussion and comments. We also  
44 thank Dr. Yoon-Mi Oh for technical assistance.

45

46 **Grant information:** This study was funded by Grants-in-Aid from The Ministry of Education,  
47 Culture, Sports, Science, and Technology (MEXT) and Japan Society for the Promotion of Science  
48 (JSPS) for Scientific Research (26350983 and 16H01622 to FK; 16H06543, 16H02840 to ST;  
49 25282247 and 15K12770 to FF) and for Scientific Researches on Innovative Areas “Adaptive Circuit  
50 Shift” (26112001 to FF).

51

52 **Abbreviations:**

53 A/P, anterior/posterior coordinate; ACSF, artificial cerebrospinal fluid; AP5,  
54 5-aminophosphonovaleric acid; BDA, biotinylated dextran amine; CB, calbindin; CC, cingulate  
55 cortex; ChR2, channel rhodopsin 2; CMAc, caudal cingulate motor area; CMAr, rostral cingulate  
56 motor area; CNQX, 6-cyano-7-nitroquinoxaline-2,3-dione; CTB, cholera toxin subunit B; D/V,  
57 dorsal/ventral coordinate; DAB, 3,3' -diaminobenzidine; EP, entopeduncular nucleus; EPSC,  
58 excitatory postsynaptic current; fAHP, fast afterhyperpolarization; FoxP2, forkhead box protein 2;  
59 GABA, gamma aminobutyric acid; GP, globus pallidus external segment in rodents; GP<sub>Bi</sub>,  
60 bi-directionally projecting GP neurons; GP<sub>CPu</sub>, GP neurons projecting to the striatum; GP<sub>STN</sub>, GP  
61 neurons projecting to the STN; ic, internal capsule; LED, light-emitting diode; Lhx6, LIM homeobox  
62 6; LO, lateral orbitofrontal area; M/L, mediolateral coordinate; MOR, mu-opioid receptor; MSN,  
63 medium spiny neuron; N.A., numerical aperture; oEPSC, optically evoked EPSC; OFC, orbitofrontal  
64 cortex; PB, phosphate buffer; PHA-L, Phaseolus vulgaris leucoagglutinin; PT, pyramidal tract; PV,  
65 parvalbumin; ROI, region of interest; RT, room temperature; sAHP, slow afterhyperpolarization;  
66 SMA, supplementary motor area; SN, substantia nigra; SNc, substantia nigra pars compacta; SNr,  
67 substantia nigra pars reticulata; STN, subthalamic nucleus; TBS, Tris buffered saline; TTX,  
68 tetrodotoxin.  
69

## 70 **Abstract**

71 The basal ganglia (BG) are critical for the control of motor behaviors and for reinforcement learning.  
72 Here, we demonstrate in rats that primary and secondary motor areas (M1 and M2) make functional  
73 synaptic connections in the globus pallidus (GP), not usually thought of as an input site of the BG  
74 using optogenetics and morphological analysis. The cortical excitation in the GP was as strong as  
75 that in the STN. GP neurons projecting to the striatum were preferentially innervated by the motor  
76 cortex. Morphological observation revealed that the density of axonal boutons from motor cortices in  
77 the GP was approximately 30% of that in the striatum, but was comparable to that in the STN. M1  
78 and M2 projected differentially to the BG in terms of topography and substructures. These results  
79 suggest that cortico-pallidal innervation is an additional excitatory input to the BG, and can affect  
80 behaviors via the cortex-basal ganglia-thalamus loop.

81

## 82 **Introduction**

83 Parallel loops of neural connections among the cerebral cortex, basal ganglia, and thalamus  
84 contribute to multiple aspects of behavior (Alexander, DeLong, & Strick, 1986; Nambu, 2008; Wei  
85 & Wang, 2016). The functions mediated by these loops depend on relevant cortical areas and brain  
86 regions receiving outputs of the basal ganglia (Hikosaka, 2007; Middleton & Strick, 2000). The loop  
87 containing the motor cortex is crucial for appropriate motor control, action selection, and  
88 movement-related learning. Dysfunction of the motor loop involves movement disorders such as

89 Parkinsonian disease (Albin, Young, & Penney, 1989; DeLong, 1990; Middleton & Strick, 2002;  
90 Nambu, 2008; Nambu et al., 2000; Parent & Hazrati, 1995a; Redgrave et al., 2010; Wichmann &  
91 DeLong, 1996). Cortical projections drive three pathways in the basal ganglia: the direct, the indirect,  
92 and the hyperdirect pathways (Bolam, Hanley, Booth, & Bevan, 2000; Y. Smith, Bevan, Shink, &  
93 Bolam, 1998). The direct and indirect pathways are mediated by two distinct types of striatal  
94 medium spiny neurons (MSNs), termed the direct- and indirect-pathway MSNs (dMSNs and iMSNs).  
95 dMSNs project to the output nuclei of the basal ganglia, namely the substantia nigra (SN) pars  
96 reticulata (SNr), and the globus pallidus internal segment, the latter termed the entopeduncular  
97 nucleus (EP) in rodents. The iMSNs project to the globus pallidus external segment (GP in rodents),  
98 which interconnects with the subthalamic nucleus (STN). In turn, both STN and GP also innervate  
99 the output nuclei. The hyperdirect pathway involves direct cortical projections to the STN (Nambu,  
100 Tokuno, & Takada, 2002), which provides the fastest information flow among the three pathways  
101 (Nambu et al., 2000). The behavioral functions of these pathways are gradually being elucidated,  
102 although recent findings propose refinement and reappraisal of the classical views of the functional  
103 roles of distinct MSNs (Calabresi, Picconi, Tozzi, Ghiglieri, & Di Filippo, 2014; Cui et al., 2013;  
104 Isomura et al., 2013; Vicente, Galvao-Ferreira, Tecuapetla, & Costa, 2016). According to the  
105 traditional model, the direct pathway promotes the execution of desired actions, whereas the indirect  
106 pathway prevents the execution of competing actions (Friend & Kravitz, 2014; Nambu, 2007;  
107 Vicente et al., 2016), and the hyperdirect pathway emergently cancels or switches imminent

108 movements (Frank, Samanta, Moustafa, & Sherman, 2007; Isoda & Hikosaka, 2008; Nambu et al.,  
109 2002; Schmidt, Leventhal, Mallet, Chen, & Berke, 2013). In this regard, basal ganglia activity and  
110 function are likely modulated by the cerebral cortex.

111       The rodent motor cortical area is composed of primary and secondary motor cortices, M1 and  
112 M2, respectively. The rodent M1 codes and conducts movement signals (Barth, Jones, & Schallert,  
113 1990; Brown & Teskey, 2014) via direct projections to the brainstem and spinal cord, analogously to  
114 the primate M1. It has been debated whether the rodent M2, which has various other names such as  
115 the medial agranular cortex and the medial precentral cortex (Ebbesen et al., 2018; Svoboda & Li,  
116 2018), is a functional counterpart of the primate premotor and/or supplementary motor areas (Barthas  
117 & Kwan, 2017; Svoboda & Li, 2018). Recent studies have revealed the functional role and  
118 significance of the rodent M2 (Guo et al., 2014; Hira et al., 2014; Hira et al., 2013; Li, Chen, Guo,  
119 Gerfen, & Svoboda, 2015; Manita et al., 2015; D. Miyamoto et al., 2016; Murakami, Shteingart,  
120 Loewenstein, & Mainen, 2017; Murakami, Vicente, Costa, & Mainen, 2014; Saiki et al., 2014; Soma  
121 et al., 2017; Sul, Jo, Lee, & Jung, 2011). The M2 integrates motor signals and multimodal  
122 sensory/internal state information [for review see Barthas and Kwan (2017)]. The M2 is also  
123 involved in the preparatory and movement phases of behavior (Guo et al., 2014; Heindorf, Arber, &  
124 Keller, 2018; Li et al., 2015; Murakami et al., 2017; Murakami et al., 2014), and learning of motor  
125 tasks (Cao et al., 2015; Kawai et al., 2015). Other frontal cortical areas are also related to motor  
126 behaviors, such as the orbitofrontal cortex and the cingulate motor area (Bissonette, Powell, &

127 Roesch, 2013; Friedman et al., 2015; Nakayama, Yokoyama, & Hoshi, 2015; Passingham & Wise,  
128 2012; Paus, 2001; Schoenbaum, Roesch, Stalnaker, & Takahashi, 2009; Sul, Kim, Huh, Lee, & Jung,  
129 2010). The neural circuitry underlying these functional roles and its effects on the basal ganglia and  
130 other subcortical regions are not fully known.

131 Neuron-type diversity is an important factor to understand the neural circuitry. It has been  
132 established that distinct neural types other than striatal dMSNs and iMSNs are present in the GP  
133 (Abdi et al., 2015; Abrahao & Lovinger, 2018; Cooper & Stanford, 2000; Dodson et al., 2015; Gittis  
134 et al., 2014; Hegeman, Hong, Hernandez, & Chan, 2016; Hernandez et al., 2015; H. Kita, 2007;  
135 Mallet et al., 2012; Mastro, Bouchard, Holt, & Gittis, 2014), EP (Y. Miyamoto & Fukuda, 2015;  
136 Wallace et al., 2017), STN (Baufreton et al., 2003; Xiao et al., 2015), and SN (Kim, Ghazizadeh, &  
137 Hikosaka, 2014; Lerner et al., 2015; Matsumoto & Hikosaka, 2009; Menegas et al., 2015). These  
138 neuronal populations differ in molecular profile, projection targets, and synaptic inputs. In addition,  
139 each nucleus of the basal ganglia contains functional/morphological subdomains (Crittenden &  
140 Graybiel, 2011; Fujiyama, Takahashi, & Karube, 2015; Hontanilla, Parent, de las Heras, &  
141 Gimenez-Amaya, 1998; H. Kita & Kita, 2001; Parent, Fortin, Cote, & Cicchetti, 1996) correlated  
142 with the distribution of glutamatergic innervation (Crittenden & Graybiel, 2011; Eblen & Graybiel,  
143 1995; Fujiyama, Unzai, Nakamura, Nomura, & Kaneko, 2006; Kincaid & Wilson, 1996; J. B. Smith  
144 et al., 2016). Even if innervated by the same set of cortical inputs, each cell type can behave  
145 differently, recruit distinct neural circuitry, and lead to various behavioral outputs. Therefore, any



146 account of the functionality of cortical projections to the basal ganglia must consider cell type and  
147 subregion.

148 Cortico-basal ganglia projections are topographically and somatotopically organized  
149 (Crittenden & Graybiel, 2011; Gabbott, Warner, Jays, Salway, & Busby, 2005; Nambu, 2011; Shipp,  
150 2016; Voorn, Vanderschuren, Groenewegen, Robbins, & Pennartz, 2004). In the rodent, frontal  
151 cortical areas project to the dorsal striatum (Barth et al., 1990; Ebrahimi, Pochet, & Roger, 1992;  
152 Reep & Corwin, 1999; Reep et al., 2008; Rouiller, Moret, & Liang, 1993). Recently, topographical  
153 maps of cortico-striatal projections have been described in detail (Hintiryan et al., 2016; Hunnicutt et  
154 al., 2016; Maily, Aliane, Groenewegen, Haber, & Deniau, 2013). Cortical projections to the striatum  
155 are dependent on the neuron type of origin (Hooks et al., 2018) and individual cortical neurons  
156 generally project to multiple sites (T. Kita & Kita, 2012; Shepherd, 2013; Shibata, Tanaka, Hioki, &  
157 Furuta, 2018; but see also Y. Smith, Wichmann, & DeLong, 2014). Thus, basal ganglia nuclei  
158 innervated by the same or different cortical areas can be affected simultaneously, in turn, their  
159 activities are modulated via the intra-basal ganglia circuitry (Bogacz, Martin Moraud, Abdi, Magill,  
160 & Baufreton, 2016; Wei & Wang, 2016). The aim of the present study was to investigate cortical  
161 projections to multiple nuclei in the basal ganglia from two motor areas, M1 and M2, in a subregion-  
162 and cell type-specific manner. Using a combination of neural tracing with immunofluorescence, we  
163 demonstrate that M1 and M2 project to different subregions of each basal ganglia nucleus, and that  
164 in the GP, cortical axon collaterals and boutons have topographic distributions that depend on the

165 cortical area of origin (Naito & Kita, 1994). Using morphological and electrophysiological  
166 experiments combined with optogenetics, we demonstrate that cortico-pallidal synapses are effective  
167 and specific for post-synaptic GP cell types. We discuss the potential roles of cortico-pallidal  
168 projections in relation to other basal ganglia nuclei.

169

## 170 **Results**

### 171 *Motor cortex innervates the GP.*

172 We observed cortical axon collaterals in the GP using conventional tracers (BDA or PHA-L; Fig. 1A,  
173 1C; Fig. 1-figure supplement. 1) or adenoassociated virus (AAV) vectors (Fig. 2A, 5A; Fig. 1-figure  
174 supplement 2), as reported previously (Naito & Kita, 1994).

175 Cortico-pallidal axon collaterals were exclusively ipsilateral (Fig. 1-figure supplement 2),  
176 implying that the layer 5 (L5) pyramidal tract (PT) type of neuron could be providing this input,  
177 thereby conveying a copy of cortical motor signals. Cortical axons were differentially distributed in  
178 the GP depending on the cortical area of origin. M1 and M2 axons were observed across the broad  
179 extent of the medio-lateral axis (range: M/L 2.4–3.7 mm; see also Fig. 1-figure supplement 1). Axon  
180 collaterals issued from the main axons and often elongated along the dorso-ventral axis (Fig. 1A, Fig.  
181 1-figure supplement 1). Combining with immunofluorescent staining for calbindin D-28k (CB),  
182 motor cortical axons, especially from M1, were preferentially found in CB-negative [CB(-)]  
183 subregions of the GP (Fig. 1A, Fig. 1-figure supplement 1).

184           These axons frequently formed small sized axonal boutons (Fig. 1C, 1D). We compared the  
185 density of cortical axonal boutons in the GP, STN, and striatum. The number of boutons was greater  
186 in the striatum than in the GP or STN (Fig. 1-figure supplement 3). Since the size and efficacy of the  
187 tracer labeling were not uniform across animals, the bouton density in the GP was normalized to that  
188 in the striatum or STN for each injection. Using this normalization, the bouton density in the striatum  
189 was found to be significantly higher than in the GP ( $p = 2.9 \times 10^{-6}$  for M1 and  $p = 2.6 \times 10^{-6}$  for M2  
190 using one-way ANOVA followed by Tukey test) or STN ( $p = 0.0018$  for M1;  $p = 0.0003$  for M2; see  
191 also Fig. 1-figure supplement 3). Bouton densities in the GP and STN were not significantly different  
192 (Fig. 1E;  $p = 0.155$  using one-way ANOVA). GP bouton density did not significantly differ between  
193 M1 and M2 axons ( $p = 0.32$ ).

194           These data suggested that M1 and M2 can affect the GP as strongly as they affect the STN.  
195 However, because bouton density does not directly indicate synaptic efficacy, we evaluated the  
196 electrophysiological features of cortico-pallidal projections.

197

### 198 ***Cortico-GP terminals elicit monosynaptic EPSCs.***

199           To confirm that the observed cortico-pallidal innervation was electrophysiologically functional, we  
200 conducted whole-cell patch clamp recordings combined with optogenetic stimulation of cortical  
201 terminals using *in vitro* slice preparations. Channel rhodopsin 2 (ChR2) was introduced into cortical  
202 neurons using *AAV-hSyn-H134R-mCherry* injection into either M1 or M2 (Fig. 2A). In voltage clamp

203 mode at a holding potential of -60 mV, stimulation with a brief light pulse (5 ms, 470 nm) elicited  
204 inward currents in GP neurons (Fig. 2B1). The response was stable over repetitive stimulation (10  
205 pulses at 2–10 Hz; Fig. 2B1). In current clamp mode, photoactivation elicited action potentials,  
206 although the action potential probability was affected by the spontaneous oscillation of the  
207 membrane potential (Fig. 2B2). To confirm that the photoactivated current that elicited action  
208 potentials was within the physiological range, we measured the minimum current required to induce  
209 action potentials (rheobase current) in GP neurons using 5-ms depolarizing pulses (Fig. 2C, inset). In  
210 half of GP neurons, the rheobase was less than 30 pA, and most GP neurons could emit an action  
211 potential with less than 100 pA of depolarization ( $N = 100$  neurons; Fig. 2C). A depolarized  
212 membrane potential and a high input resistance (Table 1) led to easy induction of action potentials by  
213 small excitation.

214 Not all GP neurons exhibited inward photocurrent. 67/159 and 151/248 neurons did so for M1  
215 and M2 stimulation, respectively (Fig. 2D). The locations of the GP neurons in which inward  
216 currents were observed were plotted (Fig. 2E). Consistent with the distribution of cortical axons,  
217 these locations were frequently around the center of the GP in coronal slices. Responsive neurons  
218 were similarly concentrated around the center of the GP along the rostro-caudal axis. Neurons  
219 responding to M1 terminal stimulation tended to be located in the dorsal GP, whereas those  
220 responding to M2 terminal stimulation were clustered in the ventral GP (Fig. 2E).

221 It is possible that the observed EPSCs were elicited by the STN via a di-synaptic circuit.

222 However, we used coronal slices with an anteroposterior position of 0.6 mm rostral (r0.6) – 2.2 mm  
223 caudal (c2.2) to bregma, which did not include the STN (Paxinos & Watson, 2007). Bath application  
224 of the sodium channel blocker tetrodotoxin (TTX) at 1  $\mu$ M completely prevented inward currents  
225 (Fig. 3A). Additional application of the potassium channel blocker 4-aminopyridine (4AP) at 1 mM  
226 recovered the currents to up to 60% of control on average (Fig. 3A), indicating that the current was  
227 monosynaptic (Gradinaru, Mogri, Thompson, Henderson, & Deisseroth, 2009; Shu, Yu, Yang, &  
228 McCormick, 2007). Moreover, a GABA<sub>A</sub> receptor antagonist (gabazine, 20  $\mu$ M) did not block the  
229 current (Fig. 3A); conversely, glutamate receptor antagonists (CNQX, 10  $\mu$ M and AP-5, 20  $\mu$ M)  
230 almost completely abolished the current (Fig. 3A). Thus, the inward current was mediated by  
231 glutamatergic excitatory postsynaptic currents (EPSCs). The latency (delay) of current onset after the  
232 photic stimulus in GP neurons did not differ from that in STN neurons (Fig. 3B1, 3B2). The 20–80%  
233 rise time and decay constant tended to be longer in GP neurons than in STN neurons (Fig. 3B3, 3B4).  
234 Taken together, these results indicated that the inward current observed in GP neurons was a  
235 monosynaptic, glutamatergic EPSC directly elicited by cortical terminals. Hereinafter, we refer to  
236 this current as an optically evoked EPSC (oEPSC).

237

238 ***M1 and M2 preferentially innervate GP neurons projecting to the striatum than those projecting***  
239 ***to STN.***

240 The results shown in Fig. 2C raised the question whether GP neurons have cell-type specific

241 cortical innervation. To determine whether cortical innervation depends on the GP-neuron projection  
242 type, we conducted *in vitro* whole cell recordings from retrogradely labeled GP<sub>STN</sub> or GP<sub>CPu</sub> neurons.  
243 Occasionally, we recorded large GP neurons with no or very little spontaneous activity ( $N = 6$ ,  $1.20 \pm$   
244  $1.79$  Hz during on-cell recording mode), which possessed a distinct action potential shape. Based on  
245 earlier reports (Bengtson & Osborne, 2000; Hernandez et al., 2015), these were most likely  
246 cholinergic neurons and were excluded from subsequent analysis, although they were found to be  
247 innervated by the cortex ( $N = 5/6$ ). In addition to the molecular profiles, the electrophysiological  
248 properties of GP<sub>CPu</sub> and GP<sub>STN</sub> neurons also differed. GP<sub>STN</sub> neurons usually showed spontaneous  
249 repetitive firing ( $\sim 20$  Hz; Table 1), whereas many GP<sub>CPu</sub> neurons were silent. Firing frequencies  
250 induced by depolarizing current pulses were higher in GP<sub>STN</sub> than in GP<sub>CPu</sub> neurons, and spike width  
251 was narrower in GP<sub>STN</sub> neurons (Fig. 4B; see Table 1 for other electrophysiological parameters and  
252 quantitative comparisons). We discovered that GP<sub>CPu</sub> neurons were more frequently innervated by  
253 motor cortex (51/62) than were GP<sub>STN</sub> neurons (53/126). The oEPSC amplitude was also larger in  
254 GP<sub>CPu</sub> neurons (Fig. 4D, E, F). The distribution of oEPSC amplitudes recorded from GP<sub>CPu</sub> neurons  
255 seemed bimodal; the smaller-amplitude group was similar to GP<sub>STN</sub> neurons (Fig. 4D). For  
256 comparison, MSNs ( $N = 11$ ) and STN neurons ( $N = 18$ ) were recorded. One-way ANOVA followed  
257 by post-hoc Tukey test revealed that the oEPSC amplitude was significantly larger in MSNs than in  
258 STN or GP neurons (for all combinations of comparisons,  $p < 9 \times 10^{-7}$ ). The oEPSC amplitude of STN  
259 neurons was not significantly different from that of GP<sub>STN</sub> ( $p = 0.109$ ) or GP<sub>CPu</sub> neurons ( $p = 0.999$ ).

260 GP<sub>CPu</sub> neurons exhibited significantly greater amplitudes than did GP<sub>STN</sub> neurons ( $p = 0.0021$ ; Fig.  
261 4D). Despite the larger EPSCs, we observed relatively hyperpolarized membrane potentials and  
262 lower membrane input resistances in MSNs compared with GP or STN neurons. The mean  
263 membrane potential ( $V_{\text{mean}}$ ) =  $-73.45 \pm 5.3$  mV and input resistance ( $R_{\text{in}}$ ) =  $79.17 \pm 28.38$  M $\Omega$  for 10  
264 MSNs;  $V_{\text{mean}} = -45.43 \pm 7.47$  mV and  $R_{\text{in}} = 253.14 \pm 156.31$  M $\Omega$  for 15 STN neurons; see Table 1 for  
265 GP neurons). Thus, the ease of induction of action potentials was lower in MSNs than in GP or STN  
266 neurons, at least in slice preparation. Actually, the median of rheobase current was 695 pA for MSNs  
267 ( $N = 10$ ; range, 450–1415 pA), whereas 55 pA for STN neurons ( $N = 30$ ; range, 10–545 pA) and 30  
268 pA for GP neurons ( $N = 100$ ; range, 5–250 pA).

269 GP<sub>CPu</sub> neurons were frequently innervated by either M1 (28/35) or M2 (23/27). In contrast,  
270 only a small fraction of GP<sub>STN</sub> neurons received M1 (17/51) or M2 (36/75) inputs (Fig. 4C). The  
271 amplitude of M1-induced oEPSCs in the GP<sub>CPu</sub> neurons was significantly larger than in the GP<sub>STN</sub>  
272 neurons ( $p = 1.5 \times 10^{-6}$  using the Wilcoxon rank sum test). This was also the case for M2-induced  
273 oEPSCs ( $p = 0.0038$ ). Therefore, both motor areas preferentially innervated GP<sub>CPu</sub> neurons, although  
274 GP<sub>STN</sub> was more effectively innervated by M2 (Fig. 4C, 4F). Indeed, the mean oEPSC amplitude in  
275 GP<sub>STN</sub> was larger with M2 stimulation than with M1 stimulation ( $p = 0.0028$ ), but no significant  
276 difference between cortical sites was observed in GP<sub>CPu</sub> neurons ( $p = 0.9595$ ). M2 stimulation  
277 frequently evoked oEPSCs with initially smaller amplitudes, especially for the first light pulse,  
278 although repetitive light pulses at 10 Hz often augmented the oEPSC amplitude, similar to M1

279 stimulation. The paired-pulse ratio for second-to-first oEPSC in GP<sub>STN</sub> neurons was  $1.27 \pm 0.81$  for  
280 M2 stimulation ( $N = 38$ ) and  $1.45 \pm 1.20$  for M1 stimulation ( $N = 14$ ); in the GP<sub>CPu</sub> neurons, it was  
281  $1.25 \pm 0.62$  for M2 stimulation and  $1.31 \pm 0.79$  for M1 stimulation.

282 To further identify characteristics of GP neuron types, using retrograde labeling of GP neurons  
283 and immunofluorescence against parvalbumin (PV), LIM homeobox 6 (Lhx6), and forkhead box  
284 protein 2 (FoxP2), we examined molecular profiles of GP neuron projection types in Wistar rats  
285 (Fujiyama, Nakano, et al., 2015). We confirmed that GP<sub>CPu</sub> neurons frequently expressed FoxP2 or  
286 Lhx6, but not PV ( $N = 659$  GP<sub>CPu</sub> neurons in three sections from three rats; Fig. 5), in agreement  
287 with previous studies in mice (Dodson et al., 2015; Hernandez et al., 2015; Mastro et al., 2014;  
288 Mizutani, Takahashi, Okamoto, Karube, & Fujiyama, 2017), Long-Evans rats (Oh et al., 2017), and  
289 Sprague-Dawley rats (Abdi et al., 2015; H. Kita & Kita, 2001). The expression of FoxP2 and Lhx6  
290 was almost mutually exclusive. Most PV(+) GP<sub>CPu</sub> neurons co-expressed Lhx6. GP<sub>STN</sub> neurons  
291 lacked expression of FoxP2 but expressed PV and/or Lhx6 ( $N = 727$  GP<sub>STN</sub> neurons in three sections  
292 from three rats; Fig. 5). Triple immunofluorescence combined with a single retrograde tracer  
293 injection into the striatum was conducted to further elucidate the molecular identity of GP<sub>CPu</sub> neurons.  
294 The expression of Lhx6 (333/665) or FoxP2 (328/665) was again almost mutually exclusive. Only a  
295 small fraction (14.7%) of Lhx6-expressing neurons co-expressed PV (49/333) (Fig. 5B).  
296 Occasionally, double-retrogradely labeled neurons, namely bi-directional projecting GP neurons  
297 (GP<sub>Bi</sub>), were observed ( $N = 113$ ). Lhx6 was expressed in most GP<sub>Bi</sub> neurons (61/69), PV less



298 frequently (19/72), and FoxP2 rarely (2/85). GP<sub>Bi</sub> neurons that expressed PV co-expressed Lhx6 in  
299 most cases examined (5/6). Therefore, GP<sub>STN</sub> neurons comprised PV(+) and/or Lhx6(+) prototypic  
300 neurons, whereas GP<sub>CPu</sub> neurons comprised arypallidal neurons expressing FoxP2 and prototypic  
301 neurons expressing Lhx6.(Fujiyama, Nakano, et al., 2015; Mallet et al., 2012). Importantly, these  
302 data insist that selective electrophysiological recording from Lhx6(+) neurons can be accomplished  
303 by targeting GP<sub>Bi</sub> neurons. As a result, we found that GP<sub>Bi</sub> also received cortical inputs (7/10 for M1  
304 and 7/9 for M2;  $N = 3$  rats for each), and most of them exhibited an oEPSCs with small amplitude  
305 (Fig. 5C). Actually, the frequency distributions of oEPSC amplitudes significantly differ between  
306 GP<sub>Bi</sub> and GP<sub>CPu</sub> neurons (Fig. 5D;  $p = 2.2 \times 10^{-16}$  by the Kolmogorov-Smirnov test). It suggests that  
307 arypallidal neurons, which do not send axons to the STN, could be a principle target of  
308 cortico-pallidal innervation.

309

### 310 ***M1 and M2 differentially innervate striatal subregions.***

311 The preceding results suggest that the two cortical motor areas project differentially to the GP. In  
312 rodents, cortical pyramidal cells send axon collaterals to multiple nuclei of the BG which, in turn, are  
313 themselves interconnected. Thus, M1 and M2 projections to nuclei other than the GP should involve  
314 information processing in cortico-basal ganglia circuitry (Lerner et al., 2015). To quantify the  
315 cortical axon distribution onto striatal molecular subregions, we employed AAV vector injection into  
316 the motor area followed by immunostaining for either CB, or  $\mu$ -opioid receptor (MOR) which is a

317 marker of the striosomes (Crittenden & Graybiel, 2011; Kincaid & Wilson, 1996; J. B. Smith et al.,  
318 2016). CB was preferentially expressed in the medial and ventral portion of the striatum and faintly  
319 in the dorsolateral striatum (Fig. 1-figure supplement 1) (H. Kita & Kita, 2001; Wouterlood, Hartig,  
320 Groenewegen, & Voorn, 2012). M1 axons were mostly confined to CB(-) subregions of the striatum  
321 (Fig. 6A), whereas M2 axons innervated both CB(-) and CB(+) striatal subregions (Fig. 6B). We  
322 quantified the axon distribution in CB(+) and CB(-) striatal subregions for both M1 and M2 axons ( $N$   
323 = 3 rats for each subregion; 12 sections for M1 and 13 sections for M2). The proportion of CB(+)  
324 pixels that contained axons was calculated in the striatum. M2 axons were found in  $37.2 \pm 9.0\%$  of  
325 CB(+) pixels, and M1 axons were found in only  $15.3 \pm 7.6\%$  of CB(+) pixels ( $p = 0.000012$  by  
326 Wilcoxon rank sum test; Fig. 6C1). To evaluate the relative strengths of the innervation, the  
327 brightness of the fluorescence in each pixel in the regions of interest (ROIs) were measured. The  
328 median pixel intensity in CB(-) ROIs was normalized to that of CB(+) ROIs. As shown in Fig. 6C2,  
329 the normalized fluorescence intensity in CB(-) striatum was  $\sim 1.6$ -times higher for both M1 ( $1.61 \pm$   
330  $0.39$ ) and M2 ( $1.56 \pm 0.28$ ) axons. These results indicated that M2 axons innervated CB(+) striatum  
331 more frequently than did M1 axons, although CB(-) ROIs were more densely innervated by both M1  
332 and M2 than were CB(+) ROIs.

333 Comparing the data in Fig. 6A and 6B shows that M1 and M2 axons exhibited differing  
334 innervation of the striosome. Based on MOR immunofluorescence, M1 axons appeared to  
335 preferentially innervate the matrix, and axon labeling in the striosomes was faint (Fig. 6D). In

336 contrast, M2 axons were almost equally distributed in both the striosome and matrix (Fig. 6E), as  
337 previously reported for mouse (J. B. Smith et al., 2016). We also observed topographical differences  
338 in striosome preference. In medial sections ( $M/L \leq 2.9$  mm), the striosomes in the ventral part of the  
339 dorsal striatum were not densely innervated by M2 axons (arrowheads in Fig. 6E2; see also Fig.  
340 1-figure supplement 1). We quantified relative preference by normalizing fluorescence intensity in  
341 the matrix to that of the striosomes (Fig. 6F). For M2, the matrix preference was only  $1.17 \pm 0.22$  ( $N$   
342 = 3 rats, 126 ROIs) in lateral sections ( $M/L > 2.9$  mm). In contrast, the matrix preference for M1 was  
343  $1.45 \pm 0.26$  ( $N = 3$  rats, 155 ROIs), a significantly greater preference for the matrix than that of M2  
344 axons ( $p < 2.2 \times 10^{-16}$  by Wilcoxon rank sum test; Fig. 6F1). In medial sections ( $M/L \leq 2.9$  mm), both  
345 M1 and M2 preferred the matrix similarly, i.e.,  $1.37 \pm 0.20$  for M1 ( $N = 60$  ROIs) and  $1.36 \pm 0.31$  for  
346 M2 ( $N = 106$  ROIs; Fig. 6F1). Taken together, these results show that striosomes in the dorsal  
347 striatum were selectively innervated by M2, especially in the lateral striatum.

#### 348

#### 349 *Cortico-subthalamic (STN) projections from frontal cortical areas*

350 Cortico-STN projections are topographically organized depending on cortical area of origin,  
351 especially in primates (Haynes & Haber, 2013; Nambu, Takada, Inase, & Tokuno, 1996; Nambu,  
352 Tokuno, Inase, & Takada, 1997). Retrograde tracer injection into the STN labeled L5 cortical  
353 neurons in a wide range of areas, among them, many neurons were found in M1, M2, and the lateral  
354 orbitofrontal area (LO) in the frontal cortex (Fig. 7-figure supplement 1). We also observed that M1

355 and M2 had different topographies of cortico-STN projection. M1 axons were concentrated in the  
356 central part of the STN along the anteroposterior and dorsoventral axis (Fig. 7A, B). The density of  
357 M1 axons was low around the rostral and caudal STN. The axon distribution in STN was similar  
358 between rostral and caudal M1 areas (Fig. 7A, B). Conversely, M2 axons were densely distributed in  
359 the dorso-anterior and ventro-posterior portions of the STN (Fig. 7C). LO provided dense axonal  
360 input to the rostral part of the STN (Fig. 7D). We quantified the preferential axon distribution in STN  
361 along the anteroposterior (Fig. 7E1) and dorsoventral axes (Fig. 7E2). Significant differences were  
362 observed among M1, M2, and LO ( $p < 0.05$  by the Kruskal-Wallis test followed by multiple  
363 comparisons based on the Fisher Exact test with a Bonferroni correction for multiple comparisons).  
364 Of note, the topographic distribution was not clearly segregated; rather, a substantial overlap of  
365 axons from different frontal cortical areas was observed (Fig. 7F).

366

### 367 *Neural projections among the striatum, GP, and STN*

368 L5 PT-type neurons, candidates for the origin of the cortico-pallidal innervation, are known to  
369 project to multiple brain nuclei including the striatum and STN (T. Kita & Kita, 2012; Shepherd,  
370 2013; Shibata et al., 2018) This suggests that when the GP receives cortical excitation, the striatum  
371 and STN are co-excited by the same source. Therefore, to elucidate the functional relevance of  
372 cortico-pallidal pathways, it is important to examine the relationship between their axon distribution  
373 and that of other, related intra-basal ganglia projections to elucidate functional relevance of

374 cortico-pallidal pathways. For bi-directional projections between GP and the striatum, CB  
375 expressions in the GP and striatum are correlated, such that the CB(+) striatum (medio-ventral  
376 striatum) projects to the outer edges of the GP, where CB immunoreactivity is obvious due to  
377 innervation by CB(+) striatal axon terminals (H. Kita & Kita, 2001). In contrast, the dorsolateral  
378 striatum which has sparse CB expression, innervates the central part of the GP, which lacks CB  
379 immunoreactivity (H. Kita & Kita, 2001; Rajakumar, Elisevich, & Flumerfelt, 1994; Rajakumar,  
380 Rushlow, Naus, Elisevich, & Flumerfelt, 1994). We confirmed these findings using tracer injections  
381 into the striatum (Fujiyama et al., 2011; Kawaguchi, Wilson, & Emson, 1990; Wu, Richard, & Parent,  
382 2000) (Fig. 8). Thus, the central GP can receive direct cortical excitation (Fig. 1, 2; Fig. 1-figure  
383 supplement 1) and iMSN innervation from the dorsolateral striatum, where motor cortex  
384 preferentially projected (Fig. 6). It suggests convergence of motor cortical information. Projections  
385 from the GP to the striatum are likely to obey the same rule (Fig. 8). For GP-to-STN projections, we  
386 found topographic projection patterns as shown in Fig. 9. The rostral GP, expressing CB, projected to  
387 the rostral part of STN, whereas the central GP, lacking CB expression, projected to the central part  
388 of STN. Because the rostral STN received M2 projection and the central STN received M1  
389 projection, again, motor cortical information can converge in the STN subregions.

390

391

392 **Discussion**

393 To summarize, we here report that direct motor cortical innervation of GP neurons is as dense  
394 as that of STN neurons. Pallidostriatal neurons were more frequently and heavily innervated by the  
395 cortex than were pallidosubthalamic neurons. We also investigated the distribution of cortical  
396 projections onto basal ganglia subregions, which likely affects the functions of the cortico-pallidal  
397 pathway, as discussed subsequently (see Fig. 10 for the schematic). To date, fast excitation observed  
398 in GP following cortical stimulation has been considered disynaptic excitation via the STN (Nambu  
399 et al., 2000). This does not fully contradict the present findings, since a larger population of GP  
400 neurons, GP<sub>STN</sub> (or prototypic neurons), was not the main target of the motor cortex. In addition, it is  
401 possible that traditional extracellular unit recordings are biased towards neurons with relatively  
402 higher firing frequency, which include GP<sub>STN</sub> neurons (Table 1). A question that remains is whether  
403 cortico-pallidal projections exist in primates including humans, as suggested (Milardi et al., 2015; Y.  
404 Smith & Wichmann, 2015).

405

#### 406 *Innervation of the basal ganglia by the frontal cortex*

407 Topographic cortical projections are well established for the striatum and STN (Heilbronner, Meyer,  
408 Choi, & Haber, 2018; Hooks et al., 2018; Janssen et al., 2017; Mathai & Smith, 2011; Nambu, 2011;  
409 J. B. Smith et al., 2016). We also demonstrated topographic differentiation of cortico-striatal  
410 projections between M1 and M2 with distinct molecular-subdomain preferences (Fig. 6). For other  
411 frontal or associative areas, we observed that LO innervated the ventromedial part of the striatum

412 with preference for the striosomes, whereas the cingulate cortex (Cg) projected to the dorsomedial  
413 striatum and avoided the striosomes, consistent with an earlier report (Friedman et al., 2015). For  
414 cortico-STN projections, M1 and M2 projected densely to the central-to-caudal portions of the STN,  
415 whereas LO and Cg projected to the rostromedial and caudomedial STN, respectively  
416 (Supplementary Fig. 1, 2). Cortico-pallidal projections were also topographically organized; M1 and  
417 M2 axons were densely distributed in the CB(-) central part of the GP (Fig. 1-figure supplement 1).  
418 Cg axons projected to the GP in a similar manner. In contrast, LO provided fewer pallidal collaterals  
419 (Fig. 1, Supplementary Fig. 1, 2). Thus, each frontal cortical area likely has its own regions of  
420 interest in each BG nucleus. In addition, CB(-) GP was interconnected with CB(-) striatum (Fig. 8;  
421 Fujiyama et al., 2011; H. Kita & Kita, 2001), and projected to the central part of the STN (Fig. 9),  
422 which received projections from motor cortices, especially M1. Similar topographic interconnections  
423 between STN and GP have been reported in primates (Shink, Bevan, Bolam, & Smith, 1996) and  
424 rodents (Baufreton et al., 2009; but see also Canteras, Shammah-Lagnado, Silva, & Ricardo, 1990;  
425 van Dijk et al., 2016). Moreover, thalamic inputs also differentiate between CB(+) and CB(-) GP (Y.  
426 Smith, Raju, Pare, & Sidibe, 2004), and GP neurons form topographic pallido-pallidal connections  
427 dependent on the location of the cell bodies (Sadek, Magill, & Bolam, 2007). Therefore, topographic  
428 interconnections among the cortex-striatum-GP-STN likely contribute to differential integration of  
429 neural signals.

430

431 ***Possible effects of cortical innervation in GP***

432 Our findings may explain the heterogeneous activity of GP neurons during movement (Arkadir,  
433 Morris, Vaadia, & Bergman, 2004; DeLong, 1971; Dodson et al., 2015; Goldberg & Bergman, 2011;  
434 Mink & Thach, 1991a, 1991b; Turner & Anderson, 1997). The firing phases of prototypic neurons  
435 (GP<sub>STN</sub>) and arkypallidal neurons corresponding to FoxP2(+) GP<sub>CPu</sub> differ with regard to cortical  
436 activity (Abdi et al., 2015; Mallet et al., 2012; Mallet et al., 2016). This may be due to biased cortical  
437 innervation of GP<sub>CPu</sub> (Fig. 4C, D, E, F). The axon terminal density of cortico-pallidal projections was  
438 sparser than cortico-striatal ones, but as dense as cortico-subthalamic ones. The neural connection in  
439 the basal ganglia is usually sparse; for example, even in the connection between STN and GP, which  
440 is clearly functional, only 1–2% of all GP neurons converge onto a single STN neuron and vice versa  
441 (Baufreton et al., 2009; Goldberg & Bergman, 2011). Moreover, even if excitatory synaptic inputs  
442 did not reach action potential threshold, the timing of subsequent action potentials is still altered  
443 (Ermentrout, 1996; Schultheiss, Edgerton, & Jaeger, 2010). Expression of sodium channels  
444 characteristic of GP neurons can boost excitatory synaptic inputs (Edgerton, Hanson, Gunay, &  
445 Jaeger, 2010; Hanson, Smith, & Jaeger, 2004). Thus, the relatively sparse cortical innervation to the  
446 GP<sub>STN</sub> neurons could nevertheless affect a small but specific component of the basal ganglia  
447 circuitry.

448 Most neighboring GP neuron pairs do not exhibit real correlation (Bar-Gad, Heimer, Ritov, &  
449 Bergman, 2003; Goldberg & Bergman, 2011; Stanford, 2003), even for pause periods (Elias et al.,



450 2007). Excitatory inputs may synchronize GP neurons more effectively, as GP neurons tend to align  
451 with STN inputs rather than with striatal inputs (Goldberg, Kats, & Jaeger, 2003). Cortico-pallidal  
452 inputs probably precede STN-GP inputs and thus strengthen STN-GP coupling (Bevan, Magill,  
453 Hallworth, Bolam, & Wilson, 2002; Bevan, Magill, Terman, Bolam, & Wilson, 2002; Parent &  
454 Hazrati, 1995b), thereby affecting the oscillatory phase and synchronization of GP neurons.

455

#### 456 *Potential roles of the cortico-pallidal pathway*

457 Mallet et al. (2012) reported that both MSNs and interneurons are innervated by arky-pallidal neurons.  
458 Npas1(+) neurons, which overlap with Lhx6(+) and FoxP2(+) GP<sub>CPu</sub> neurons, synapse onto iMSNs  
459 and dMSNs. The average inhibitory postsynaptic current amplitude is significantly larger in iMSNs  
460 (Glajch et al., 2016). In turn, iMSNs inhibit all GP neuron types equally (Hernandez et al., 2015).  
461 GP<sub>STN</sub> is also activated by M2 terminals. A substantial difference among GP<sub>STN</sub> cell types has been  
462 reported for innervation of the SNc (Mastro et al., 2014; Oh et al., 2017). Based on our results  
463 suggesting that M2 but not M1 project to the dorsolateral striosomes (Fig. 6) and the fact that  
464 striosomal dMSNs innervate the SNc (Fujiyama et al., 2011; Gerfen, 1985), M2-driven pathways  
465 may modulate dopamine signaling via the striatum and GP<sub>STN</sub>. Recently, Viana-Magno et al. (Viana  
466 Magno et al., 2019) revealed that M2 activation can relieve the motor dysfunction of Parkinson's  
467 disease in mice. The neural circuitry proposed here is highly likely to contribute to such an effect.

468 As shown in Fig. 1-figure supplement 2, the cortico-pallidal pathway likely originates from PT

469 neurons, which also issue axon collaterals to STN (Shepherd, 2013; Shibata et al., 2018). In addition,  
470 dense labeling of L5 neurons following injection of retrograde tracer in STN (Fig. 7-figure  
471 supplement 1) suggested that STN-projecting neurons are unlikely to form a specific population of  
472 PT neurons in rodents (Shibata et al., 2018). Thus, once M1 activates, cortical signals are transmitted  
473 to the striatum, STN, and GP (Fig. 10). Due to their membrane properties, STN and GP neurons will  
474 be activated more effectively and earlier than striatal neurons (Jaeger & Kita, 2011). Since  $GP_{CPU}$   
475 neurons are activated by direct M1 inputs, they may exhibit more activity than  $GP_{STN}$  neurons and be  
476 more in phase with cortical excitation. In contrast,  $GP_{STN}$  neurons are not strongly activated by M1.  
477 The M1-pallidal pathway therefore is unlikely to counteract hyperdirect inputs onto STN neurons.  
478 Because the latency and strength of oEPSCs in  $GP_{CPU}$  neurons were almost equal to those in STN  
479 neurons (Fig. 6, 11), STN and GP neurons may be excited simultaneously. Inhibition of MSNs by  
480  $GP_{CPU}$  could counteract corticostriatal excitation and weaken iMSN activity. Decreased iMSN  
481 activity may reduce inhibition of GP neurons, thereby augmenting the inhibition of STN, EP, and  
482 SNr. Operation of this trisynaptic circuit may require a long duration; thus, the M1 cortico-pallidal  
483 pathway may act as a delayed terminator of the hyperdirect pathway.  $GP_{CPU}$  can also inhibit dMSNs,  
484 which in turn disinhibit the EP/SNr. If iMSN activity is suppressed by  $GP_{CPU}$ , what controls  
485 cortico- $GP_{CPU}$  excitation? The most parsimonious explanation is that decreased cortico-pallidal  
486 activity can weaken GP excitation. In addition,  $GP_{CPU}$  inputs onto iMSNs will not completely block  
487 cortico-striatal excitation, but may delay it. It is noteworthy that striatal neurons receive contralateral

488 cortical excitation as well as ipsilateral input (Wilson, 1986, 1987), whereas the GP and STN receive  
489 only ipsilateral excitation (Fig. 1-figure supplement 2). It is also possible that axon collaterals of  
490 dMSNs inhibit the GP (Fujiyama et al., 2011; Kawaguchi et al., 1990; Lévesque, Bédard, Cossette, &  
491 Parent, 2003; Wu et al., 2000). In addition, pallidostriatal inhibition of striatal interneurons can  
492 possibly disinhibit MSN activity. Finally, via local boutons of GP neurons (Fujiyama, Nakano, et al.,  
493 2015; Mallet et al., 2012), mutual inhibition (Bugaysen, Bar-Gad, & Korngreen, 2013; Mastro et al.,  
494 2017; Sadek et al., 2007) may work to terminate transient excitation of the GP.

495 In the case of M2 input to GP, the GP<sub>STN</sub> pathway can also be activated, as well as the GP<sub>CPu</sub>  
496 pathway described above (Fig. 10B). M2-GP<sub>STN</sub> circuitry may be more sensitive to timing, because  
497 the GP and STN form bidirectional connections, and the cortico-pallidal pathway can act as fast as  
498 the hyperdirect pathway. These two pathways may compete: if GP<sub>STN</sub> is activated first, it will  
499 suppress STN; if STN is activated first, GP will be excited directly by the cortex and via the STN, in  
500 turn inhibiting the STN. Taken together, the results suggest that the net effect of M2-GP<sub>STN</sub> pathway  
501 activity is likely to be suppression of the STN. However, basal ganglia activity may be strongly  
502 affected by competition between M2-pallidal and hyperdirect pathways. Because the hyperdirect  
503 pathway contributes to cessation of ongoing actions, the cortico-pallidal pathway may cancel this  
504 cessation signal. Mallet et al. (2015) proposed a two-step model for cancellation via cooperation  
505 between the STN and GP, especially arkypallidal neurons. Our current findings shed light on the  
506 linking of complex stop/cancel sequences.

507

508 ***Functional differentiation between M1 and M2***

509 The overall effect of cortico-pallidal innervation may be suppression of the hyperdirect  
510 pathway, and its timing and efficacy related to the selective cortical innervation of GP cell-type(s).  
511 Therefore, our first assumption concerning the origin of the cortico-pallidal pathway should be  
512 revisited here. A paper reported that PT neurons issuing axon collaterals in the STN did not provide  
513 collaterals to the GP (T. Kita & Kita, 2012). If the hyperdirect and cortico-pallidal pathways originate  
514 from distinct neurons, the timing of activity will be substantially affected.

515 The findings of recent *in vivo* experiments in rodents are contradictory regarding the presence  
516 of functional differentiation between M1 and M2 during movement tasks, implying task-dependency  
517 (Makino, Hwang, Hedrick, & Komiyama, 2016). On one hand, M2 contributes to the preparatory  
518 function (Svoboda & Li, 2018), as observed in primates (Wise, 1985), or increases its influence on  
519 other cortical areas during the preparatory phase (Makino et al., 2017). PT neurons have been  
520 strongly implicated in preparatory processes as well as movement (Li et al., 2015). GP neurons are  
521 also suggested to compute action selection (Bogacz et al., 2016; Goldberg & Bergman, 2011), which  
522 likely relates to preparation of movement; and the M2-pallidal pathway may therefore contribute. It  
523 has been suggested that M2 is involved in the integration of movement with sensory or internal  
524 information (Barthas & Kwan, 2017; Saiki et al., 2014), including posture coding (Mimica, Dunn,  
525 Tombaz, Bojja, & Whitlock, 2018). It is possible that M2-GP innervation reflects sensory signal  
526 information, and contributes to the fine tuning of ongoing movement such as the adaptation of

527 chosen behaviors. Along with possibly involving the dopamine system, the M2-GP pathway may  
528 relate more plastic and integrated phases of movement, which may require sensitive control using  
529 two GP cell types. Natural action is a highly complex system, which involves the cerebrum, brain  
530 stem, spinal cord, and midbrain nuclei (Arber & Costa, 2018; Bostan, Dum, & Strick, 2013; Kelly &  
531 Strick, 2004). Concurrent and similar activities of M1 and M2 neurons have been reported, at least  
532 for certain movements (Saiki et al., 2014; Soma et al., 2017). Parallel connections between M1 and  
533 M2 also affect the aforementioned neural circuitry (Ueta, Hirai, Otsuka, & Kawaguchi, 2013; Ueta,  
534 Otsuka, Morishima, Ushimaru, & Kawaguchi, 2013). To conclude, the functional relevance of  
535 cortico-pallidal projections, M1/M2, and Cg differentiation for both behavioral output and neural  
536 circuitry remain to be resolved in detail.

537

## 538 **Materials and methods**

539 Animal experiments were approved and performed in accordance with the guidelines for the care and  
540 use of laboratory animals established by the Committee for Animal Care and Use and the Committee  
541 for Recombinant DNA Study of Doshisha University. All efforts were made to minimize animal  
542 suffering and the number of animals used.

543

### 544 *Animal surgery for injection of neural tracers and viral vectors*

545 Wistar SLC rats (Japan SLC Inc., Hamamatsu, Japan;  $N = 65$  of both sexes for electrophysiological

546 experiments and  $N = 30$  male rats for morphological experiments) were anesthetized with  
547 intramuscular injection of a mixture of ketamine (Ketalar; Daiichi-Sankyo, Tokyo, Japan; 40 mg/kg)  
548 and xylazine (Bayer HealthCare, Tokyo, Japan; 4 mg/kg). A small amount (0.05 mL) of the mixture  
549 was additionally injected every 15 min during any prolonged surgery ( $>1$  h). Body temperature was  
550 monitored and controlled at  $37^{\circ}\text{C}$  with the aid of a heating device (World Precision Instruments  
551 [WPI], Sarasota, FL, USA). Craniotomy was performed with a drill at an appropriate position on the  
552 skull based on the rat brain atlas (Paxinos & Watson, 2007). A glass pipette (tip diameter, 30–60  $\mu\text{m}$ )  
553 was used for all injections. For anterograde tracers, biotinylated dextran amine (BDA, 10 kDa; 10%  
554 solution dissolved in PB; Thermo Fisher Scientific, Waltham, MA, USA) was injected using either a  
555 brief air pulse (10–20 psi for 40–100 ms) controlled with a coordinated valve system (PV 820, WPI)  
556 or using electrophoresis (0.5–2  $\mu\text{A}$  of positive current, 7 s ON/7 s OFF for 80 cycles) with a current  
557 controller (WPI). PHA-L (Vector Laboratories, Burlingame, CA, USA; 2.5% dissolved in 10 mM  
558  $\text{Na}_2\text{HPO}_4$ , pH 8.0) was injected using electrophoresis (1–5  $\mu\text{A}$  positive current, 7 s ON/7 s OFF for  
559 80 cycles). To reduce number of rats, BDA and PHA-L were injected into different cortical areas in  
560 individual rats, and brain sections derived from each rat were used for quantitative morphological  
561 analysis in GP, CPu, and STN (Fig. 1, .7, Supplementary Fig. 1). AAV vectors encoding fluorophores  
562 were injected using air pressure ( $1.5 \times 10^{10}$  vg [vector genomes]/ $\mu\text{L}$ ,  
563 *AAVdj-hSyn-hChR2(H134R)-mCherry*; the plasmid a gift from Karl Deisseroth; Addgene plasmid  
564 #26976; <http://n2t.net/addgene:26976>; RRID: Addgene\_26976). For retrograde tracers, cholera toxin

565 subunit B (CTB) conjugated with Alexa Fluor 488 or 555 (Thermo Fisher Scientific) and  
566 fluorophore-labeled beads (Green Retrobeads IX, LumaFluor Inc., Durham, NC, USA; FluoSphere  
567 Orange 0.04  $\mu\text{m}$ , Thermo Fisher Scientific) were injected using air pressure. For labeling cortical  
568 neurons, injections were performed at two to three depths typically at 400  $\mu\text{m}$ -intervals. The  
569 stereotaxic coordinates (Paxinos & Watson, 2007) of injections in the centers of each cortical area  
570 were as follows (the actual injection locations were normalized based on skull size using the distance  
571 between bregma and lambda): for rostral M1, 2.0 mm rostral from bregma (A/P r2.0) and 2.5 mm  
572 lateral from the midline (M/L 2.5), depth 0.5–1.2 mm from cortical surface; for caudal M1: A/P 0.0,  
573 M/L 2.6, depth 0.5–1.2; for M2: A/P r4.2, M/L 1.9, depth 0.5–1.2 at a 30° angle rostral from vertical;  
574 for lateral orbitofrontal area (LO): A/P r3.4, M/L 2.9, depth 4.0. Because the Cg is located at the  
575 medial surface of the frontal cortex and is enclosed by M2, contamination of M2 following vertical  
576 injections into the Cg would have been unavoidable. Therefore, for injections into the Cg, the  
577 contralateral medial frontal area was removed using an aspiration needle and vacuum pump to  
578 expose the medial surface of the frontal cortex of the targeted hemisphere. An injection electrode was  
579 then inserted into the Cg at an angle of 45° (A/P r1.8, M/L 0.5) and the contents of the electrode  
580 ejected into the Cg at two depths (0.5 and 1.0) using air pressure. Tracer injections into the striatum  
581 were performed in two ways. To visualize striatum subregion-specific projections (Fig. 8),  
582 iontophoresis was applied at a single location at A/P r1.0, M/L 3.5, depth 4.2, for injection into  
583 CB-negative dorsolateral striatum, and at A/P 0.8 mm caudal to bregma (c0.8), M/L 4.0, depth 3.9

584 for CB-positive areas. For efficient retrograde labeling of GP neurons projecting to the dorsal  
585 striatum, pressure injection was applied in three tracks (two depths for each track) at A/P r2.0, M/L  
586 2.5, depth 3.8; A/P r1.0, M/L 3.5, depth 4.2; and A/P 0.0, M/L 3.7, depth 4.0. Micro-iontophoretic  
587 injections into subregions of the GP were located at A/P c1.2 for the rostral GP, A/P c1.6 for the  
588 central GP, and A/P c2.0 for the caudal GP. For these injections, the M/L and depth positions were  
589 3.2 and 6.2, respectively. Tracers were injected into the STN at A/P c3.5, M/L 2.5, and depth 7.5  
590 using air pressure. After injections, the skin was sutured and 2.5 mg/kg of butorphanol (Vetorphale,  
591 Meiji Seika Pharma, Tokyo, Japan) was subcutaneously injected as an analgesic. The animals were  
592 allowed to recover before further experimentation. We allowed 2–4 d of survival time for BDA or  
593 retrograde tracers, 5–8 d for PHA-L, and 2–4 weeks for AAV. The age of rats ranged 7 to 12 weeks  
594 for morphological experiments.

595

### 596 ***Immunohistochemistry***

597 After the survival period, rats were deeply anesthetized with an intraperitoneal injection of sodium  
598 pentobarbital (100 mg/kg; Kyoritsu Seiyaku Corporation, Tokyo, Japan) and perfused with  
599 pre-fixative (sucrose 8.5% w/v, MgCl<sub>2</sub> 5 mM; dissolved in 20 mM PB) followed by fixative (2 or 4%  
600 paraformaldehyde and 0.2% picric acid with or without 0.05% glutaraldehyde in 0.1 M PB, pH 7.4)  
601 through the cardiac artery. The brains were post-fixed *in situ* for 2–3 h, and then removed and  
602 washed with PB several times. Sagittal or coronal sections 50- $\mu$ m thick were cut using a vibratome



603 (Leica VT1000, Leica Instruments, Wetzlar, Germany) or freezing microtome (Leica SM 2000R),  
604 and stored in PB containing 0.02% NaN<sub>3</sub> until further use.

605 For immunoreaction, sections were incubated with primary antibody diluted in incubation  
606 buffer consisting of 10% normal goat serum, 2% bovine serum albumin, and 0.5% Triton X in 0.05  
607 M Tris buffered saline (TBS) overnight at room temperature (RT) or for 2–3 d at 4°C. For  
608 immunofluorescence, after rinsing with TBS three times, the sections were incubated with the  
609 secondary antibodies conjugated with fluorophores for 3 h at RT. After three rinses, the sections were  
610 dried on glass slides and coverslipped with antifade mounting medium (ProLong Gold, Vector). For  
611 brightfield specimens, the sections were incubated with a biotinylated secondary antibody followed  
612 by rinses and then reacted with ABC solution (1:200 dilution; Vector Elite) for 3 h at RT, and  
613 visualized with 3,3'-diaminobenzidine (DAB), Ni-DAB or Tris-aminophenyl-methane (TAPM). The  
614 sections were dehydrated with a graded series of ethanol, delipidated with xylene, and finally  
615 embedded with M·X (Matsunami Glass Ind., Ltd., Osaka, Japan). The primary and secondary  
616 antibodies used in this study are listed in Supplementary Tables 1 and 2.

617

### 618 ***Image acquisition***

619 Photomicrographs of brightfield specimens were captured using a CCD camera (DP-73, Olympus,  
620 Tokyo, JAPAN) equipped with a BX-53 microscope (Olympus) using 4× (numerical aperture [N.A.]  
621 0.13), 10× (N.A. 0.3), 40× (N.A. 0.75), 60× (N.A. 0.9) or 100× (N.A. 1.4; oil-immersion) objectives.

622 Photomicrographs were analyzed using Fiji (a distribution of Image J) (Schindelin et al., 2012), and  
623 Adobe photoshop (Adobe Systems Incorporated, Sam Jose, CA, USA). The brightness of digitized  
624 images was adjusted using the adjust-level function of these applications. To obtain a multifocus  
625 image, images were captured with 1- $\mu$ m steps and processed with the “extended depth of focus” Fiji  
626 plugin. Fluorescent images were captured using an Orca Spark CMOS camera (Hamamatsu  
627 photonics, Hamamatsu, Japan) or a DP-73 camera equipped with a BX-53 microscope. To quantify  
628 the molecular expression patterns of GP neuron types, immunofluorescent images were acquired  
629 using a confocal microscope (FV1200, Olympus) with 40 $\times$  (N.A. 0.95) or 100 $\times$  (N.A. 1.35; silicon  
630 oil immersion) objectives.

631

### 632 *in vitro slice recordings*

633 Basal ganglia neurons were recorded using *in vitro* whole cell patch clamp. Rats of both sexes ( $N =$   
634 65; postnatal 30–65 d) were deeply anesthetized with isoflurane and perfused with 25 mL of ice-cold  
635 modified artificial cerebrospinal fluid (ACSF; N-methyl-D-glucamine, 93; KCl, 2.5; NaH<sub>2</sub>PO<sub>4</sub>, 1.2;  
636 NaHCO<sub>3</sub>, 30; HEPES, 20; glucose, 25; sodium ascorbate, 5; thiourea, 2; sodium pyruvate, 3; MgCl<sub>2</sub>,  
637 10; and CaCl<sub>2</sub>, 0.5; all in mM; pH was adjusted to 7.3 with HCl). All ACSFs were continuously  
638 aerated with 95/5% O<sub>2</sub>/CO<sub>2</sub>. Brains were removed and immersed in ice-cold modified ACSF for 2  
639 min. Coronal slices 300- $\mu$ m thick were cut using a vibratome (7000smz-2, Campden, Leicestershire,  
640 UK) and incubated with modified ACSF at 32°C for 15 min. The slices were transferred to normal

641 ACSF (NaCl, 125; KCl, 2.5; CaCl<sub>2</sub>, 2.4; MgCl<sub>2</sub>, 1.2; NaHCO<sub>3</sub>, 25; glucose, 15; NaH<sub>2</sub>PO<sub>4</sub>, 1.25;  
642 pyruvic acid, 2; lactic acid, 4; all in mM) at RT. After 1 h of recovery, slices were moved into a  
643 recording chamber thermostatted at 30°C. A whole-cell glass pipette of 4–6 MΩ was filled with  
644 intracellular solution (K-gluconate, 130; KCl, 2; Na<sub>2</sub>ATP, 3; NaGTP, 0.3; MgCl<sub>2</sub>, 2; Na<sub>4</sub>EGTA, 0.6;  
645 HEPES, 10; biocytin, 20.1; all in mM). The pH was adjusted to 7.3 with KOH, and the osmolality  
646 was adjusted to ~290 mOsm. Target brain regions were identified with the aid of a fluorescence  
647 microscope (BX-51WI, Olympus) using a ×40 water-immersed objective lens. Current clamp  
648 recordings were low-pass filtered at 10 kHz and recorded using EPC10 (HEKA Elektronik Dr.  
649 Schulze GmbH, Lambrecht/Pfalz, Germany) with a sampling rate of 20 kHz. The series resistance  
650 was examined by applying a brief voltage pulse of -10 mV for 10 ms and was confirmed to be less  
651 than 25 MΩ during recording. Shortly (less than 1 min) after achieving whole cell configuration, the  
652 firing responses to 1-s depolarizing current pulses (maximum intensity was 1000 pA, increasing in  
653 50-pA steps) were recorded in current clamp mode. Passive membrane properties were monitored as  
654 responses to 1-s hyperpolarizing current pulses.

655 For photoactivation of ChR2, a 470-nm light-emitting diode (LED; BLS-LCS-0470-50-22,  
656 Mightex Systems, Pleasanton, CA, USA) was used at full field illumination through a 40× water  
657 immersion objective. Five-millisecond blue light pulses were applied at a maximum total power of  
658 ~4 mW, at which neuronal responses were saturated. In some experiments, low concentrations of  
659 TTX, 1 μM, and 4-amino pyridine (100 μM) were added to the ACSF to isolate monosynaptic

660 currents (Petreanu, Mao, Sternson, & Svoboda, 2009; Shu et al., 2007). CNQX (10  $\mu$ M) and AP5 (50  
661  $\mu$ M) were applied to inhibit glutamatergic synaptic currents ( $N = 10$ ), and SR95531 (gabazine; 20  
662  $\mu$ M) was applied ( $N = 10$ ) to prevent GABA<sub>A</sub> receptor-mediated synaptic currents. All  
663 pharmacological reagents were purchased from Tocris Bioscience (Bristol, UK).

664 Slices were then fixed with a mixture of 4% paraformaldehyde, 0.05% glutaraldehyde, and  
665 0.2% picric acid in 0.1 M PB overnight at 4°C. Fixed slices were rinsed with PB (3  $\times$  10 min), and  
666 then re-sectioned into 50- $\mu$ m-thick sections. The sections were incubated with 1% H<sub>2</sub>O<sub>2</sub> in 0.05 M  
667 TBS for 30 min at RT to deplete endogenous peroxidases, then rinsed with TBS three times. The  
668 sections were incubated with CF350-conjugated streptavidin for 2 h (1:3000; Biotium, Inc., Fremont,  
669 CA) for fluorescent investigation of biocytin filled neurons. For brightfield microscopy, the sections  
670 were incubated with ABC (1:200; Elite, Vector) overnight at 4°C. Biocytin-filled neurons were  
671 visualized for light microscopy with Ni-DAB using H<sub>2</sub>O<sub>2</sub> at a final concentration of 0.01%. The  
672 sections were dried on a glass slide and coverslipped with EcoMount (Biocare Medical, LLC,  
673 Concord, CA).

674

## 675 *Data analysis*

### 676 *Quantification of corticostriatal axon density*

677 To quantify the distribution of cortical axons in the striosome and matrix, regions of interest (ROI)  
678 were first set as square fields of approximately 10  $\times$  10 pixels and located in a striosome component

679 expressing MOR. The size of the ROI was adjusted according to the size of the striosome. The  
680 fluorescence intensity of each pixel in the ROI was measured, and the median was used as the  
681 representative intensity for that ROI. Next, an ROI of the same size was set in the matrix close to the  
682 striosome, and the median fluorescence intensity of the matrix ROI was obtained. Each striosome  
683 ROI was accompanied by one matrix ROI. During ROI placement, areas containing axon bundles of  
684 passage were excluded. To reduce the variance of the injection size and number of labeled neurons,  
685 the fluorescence intensity of the matrix ROI was normalized to that of the striosome ROI. Thus, if  
686 axons were equally distributed in the striosome and matrix, the normalized intensity would be 1.0. To  
687 quantify axon density in CB-positive striatum, images of CB immunofluorescence were binarized,  
688 and the number of pixels containing cortical axons were counted. The median value of pixel intensity  
689 was used for representing projection strength.

690

### 691 *Quantification of cortico-pallidal axon density*

692 Many thick cortical axon bundles with strong fluorescence passed through the GP, which largely  
693 disrupted proportional relationships between fluorescence intensity and axon varicosity (or bouton)  
694 density. Therefore, we manually counted axonal varicosities in each ROI using brightfield  
695 microscopic images. ROIs of  $233 \times 173 \mu\text{m}$  were selected as the locations of densest axon terminals.  
696 Because cortical boutons were observed in the striatum and STN of the same animal, these were also  
697 counted, and the resultant bouton density was compared with those of the GP to decrease the effect

698 of variability of tracer injections.

699

### 700 *Tracing and quantification of labeled cortical or pallidal axons in the STN*

701 Axons in serial sagittal sections were manually traced on paper using a drawing tube equipped with a

702 microscope (OPTIPHOT, Nikon Instech Co., Ltd, Tokyo, Japan) with a  $\times 40$  objective (N.A. 0.7).

703 The tracings were scanned and saved as digital data. The resolution of a digitized image was 0.48

704  $\mu\text{m}/\text{px}$ . For quantification using Fiji, the digitized data were converted into a binary image and the

705 presence of axons was determined pixelwise. For comparisons of spatial axon distributions in the

706 STN among cortical areas of origin, the STN was divided into 10 equal parts along the A/P axis or

707 into six equal parts along the dorsoventral axis. In each division, the numbers of pixels with and

708 without cortical axons were counted, and the proportion of axon-containing pixels to all pixels was

709 calculated for each division. The proportion data was also normalized to the maximum value for each

710 injection. The mean values of 2 M/L plane sections (M/L, 2.3 mm and 2.7 mm) are indicated in Fig.

711 7E ( $N = 3$  rats for M1,  $N = 2$  for M2, and  $N = 2$  for LO).

712

### 713 *Analysis of electrophysiological data*

714 Our analysis method has been previously described (Mizutani et al., 2017; Oh et al., 2017). Briefly,

715 slice recording data were analyzed using Igor Pro 7 (Wave metrics Inc., Portland, OR) with the aid of

716 the Neuromatic plugin (<http://www.neuromatic.thinkrandom.com>)(Rothman & Silver, 2018) and

717 handmade procedures. Neurons in the striatum, basal nucleus of Meynert, and GP possessed distinct  
718 firing properties and were readily distinguished. In the GP, GABAergic projection neurons and  
719 putative cholinergic neurons were distinguishable by cell morphology and firing properties. Putative  
720 cholinergic neurons were excluded from the present data. The locations of recorded cells were  
721 visualized with biocytin and manually plotted on a digital image.

722

### 723 *Statistical comparisons*

724 Averaged data are provided as mean  $\pm$  standard deviation unless otherwise noted. Data comparison  
725 among more than two groups was performed using one-way ANOVA followed by a post hoc Tukey  
726 test, using R software (<http://www.r-project.org/>; R Project for Statistical Computing, Vienna,  
727 Austria). Data comparison between two groups was performed using the Wilcoxon rank sum test. For  
728 comparison of proportion values, Fisher's exact test was used. For comparison of cumulative  
729 histograms, the Kolmogorov-Smirnov test was applied. Differences in data values were considered  
730 significant if  $p < 0.05$ . Significant differences are indicated using asterisks (\*,  $p < 0.05$ ; \*\*,  $p < 0.01$ ;  
731 \*\*\*,  $p < 0.001$ ). All  $p$ -values are reported.

732

733

734 **Table 1.**

735 Electrophysiological properties of globus pallidus (GP) neurons

|                                                  | GP <sub>STN</sub> ( <i>N</i> = 108) | GP <sub>CPu</sub> ( <i>N</i> = 65) | <i>p</i> value            |
|--------------------------------------------------|-------------------------------------|------------------------------------|---------------------------|
| Mean membrane potential (mV)                     | -46.63 ± 4.95<br>(-34.2– -61.53)    | -46.36 ± 5.9<br>(-33.59– -60.53)   | 0.682                     |
| Input resistance (MΩ)                            | 232.35 ± 131.87<br>(33.1–887.45)    | 329.97 ± 168.19<br>(32.8–828.3)    | 6.8×10 <sup>-05</sup> *** |
| Time constant (ms)                               | 12.94 ± 10.23<br>(2.25–79.75)       | 21.92 ± 13.11<br>(2.42–55.67)      | 2.1×10 <sup>-07</sup> *** |
| Sag potential (mV)                               | 7.23 ± 4.52<br>(1.25–22.02)         | 8.71 ± 7<br>(0.63–35.18)           | 0.3432                    |
| Spike frequency at 100 pA depolarization<br>(Hz) | 48.46 ± 22.94<br>(0–103)            | 35.81 ± 19.6<br>(2–85)             | 0.00041 ***               |
| Spike frequency at 500 pA depolarization<br>(Hz) | 99.14 ± 66.87<br>(1–244)            | 35.24 ± 39.24<br>(1–172)           | 1.8×10 <sup>-09</sup> *** |
| Maximum spike frequency (Hz)                     | 135.04 ± 65.42<br>(11–263)          | 72.14 ± 36.12<br>(2–172)           | 1.0×10 <sup>-09</sup> *** |
| Current at maximum spike frequency (pA)          | 578.63 ± 277.97<br>(50–1000)        | 345.24 ± 219<br>(50–1000)          | 6.9×10 <sup>-08</sup> *** |



|                                                      |                                   |                                  |                           |
|------------------------------------------------------|-----------------------------------|----------------------------------|---------------------------|
| Spike height (mV)                                    | 74.06 ± 9.77<br>(47.04–96.98)     | 76.55 ± 11.69<br>(38.84–95.97)   | 0.051                     |
| Spike width (ms)                                     | 0.95 ± 0.29<br>(0.63–2.29)        | 1.19 ± 0.32<br>0.7–2.17          | 1.6×10 <sup>-09</sup> *** |
| Spike threshold (mV)                                 | -37.57 ± 4.79<br>(-24.09– -48.11) | -37.7 ± 5.32<br>(-23.14– -46.03) | 0.5351                    |
| fAHP amplitude (mV)                                  | 21.16 ± 5.14<br>(9.1–38.72)       | 18.09 ± 4.57<br>(11.88–36.34)    | 1.3×10 <sup>-05</sup> *** |
| fAHP delay after spike peak (ms)                     | 0.98 ± 0.39<br>(0.55–2.7)         | 1.31 ± 0.55<br>(0.6–3.8)         | 3.4×10 <sup>-07</sup> *** |
| sAHP amplitude (mV)                                  | 18.26 ± 4.2<br>(9.47–32.87)       | 16.54 ± 4.71<br>(10.38–29.78)    | 0.0035 **                 |
| sAHP delay after spike peak (ms)                     | 9.63 ± 3.32<br>(2.25–16.95)       | 22.58 ± 13.54<br>(2.25–65.5)     | 4.5×10 <sup>-12</sup> *** |
| On cell mode spontaneous firing frequency<br>(Hz)    | 20.79 ± 18.74<br>(0–90.53)        | 5.47 ± 9.22<br>(0–35.68)         | 1.2×10 <sup>-08</sup> *** |
| Whole cell mode spontaneous firing<br>frequency (Hz) | 19.02 ± 13.74<br>(0–61.74)        | 9.41 ± 9.44<br>(0–31.85)         | 4.0×10 <sup>-06</sup> *** |

736 GP<sub>STN</sub>, GP neurons projecting to the subthalamic nucleus; GP<sub>CPu</sub>, GP neurons projecting to the  
737 striatum; fAHP, fast afterhyperpolarization; sAHP, slow afterhyperpolarization; \*\*,  $p < 0.01$ ; \*\*\*,  $p$   
738  $< 0.001$ . Statistical significance was examined using the Wilcoxon rank sum test. The range of each  
739 parameter is shown in parentheses.

740

741 **References**

- 742 Abdi, A., Mallet, N., Mohamed, F. Y., Sharott, A., Dodson, P. D., Nakamura, K. C., . . . Magill, P. J. (2015).  
743 Prototypic and arkypallidal neurons in the dopamine-intact external globus pallidus. *J Neurosci*,  
744 *35*(17), 6667-6688. doi:10.1523/JNEUROSCI.4662-14.2015
- 745 Abrahao, K. P., & Lovinger, D. M. (2018). Classification of GABAergic neuron subtypes from the globus  
746 pallidus using wild-type and transgenic mice. *J Physiol*, *596*(17), 4219-4235.  
747 doi:10.1113/JP276079
- 748 Albin, R. L., Young, A. B., & Penney, J. B. (1989). The functional anatomy of basal ganglia disorders.  
749 *Trends Neurosci*, *12*(10), 366-375.
- 750 Alexander, G. E., DeLong, M. R., & Strick, P. L. (1986). Parallel organization of functionally segregated  
751 circuits linking basal ganglia and cortex. *Annu Rev Neurosci*, *9*, 357-381.  
752 doi:10.1146/annurev.ne.09.030186.002041
- 753 Arber, S., & Costa, R. M. (2018). Connecting neuronal circuits for movement. *Science*, *360*(6396),  
754 1403-1404. doi:10.1126/science.aat5994
- 755 Arkadir, D., Morris, G., Vaadia, E., & Bergman, H. (2004). Independent coding of movement direction and  
756 reward prediction by single pallidal neurons. *J Neurosci*, *24*(45), 10047-10056.  
757 doi:10.1523/JNEUROSCI.2583-04.2004
- 758 Bar-Gad, I., Heimer, G., Ritov, Y., & Bergman, H. (2003). Functional correlations between neighboring  
759 neurons in the primate globus pallidus are weak or nonexistent. *J Neurosci*, *23*(10), 4012-4016.
- 760 Barth, T. M., Jones, T. A., & Schallert, T. (1990). Functional subdivisions of the rat somatic sensorimotor  
761 cortex. *Behav Brain Res*, *39*(1), 73-95.
- 762 Barthas, F., & Kwan, A. C. (2017). Secondary Motor Cortex: Where 'Sensory' Meets 'Motor' in the Rodent  
763 Frontal Cortex. *Trends Neurosci*, *40*(3), 181-193. doi:10.1016/j.tins.2016.11.006
- 764 Baufreton, J., Garret, M., Rivera, A., de la Calle, A., Gonon, F., Dufy, B., . . . Taupignon, A. (2003). D5 (not  
765 D1) dopamine receptors potentiate burst-firing in neurons of the subthalamic nucleus by  
766 modulating an L-type calcium conductance. *J Neurosci*, *23*(3), 816-825.
- 767 Baufreton, J., Kirkham, E., Atherton, J. F., Menard, A., Magill, P. J., Bolam, J. P., & Bevan, M. D. (2009).  
768 Sparse but selective and potent synaptic transmission from the globus pallidus to the subthalamic  
769 nucleus. *J Neurophysiol*, *102*(1), 532-545. doi:10.1152/jn.00305.2009
- 770 Bengtson, C. P., & Osborne, P. B. (2000). Electrophysiological properties of cholinergic and noncholinergic  
771 neurons in the ventral pallidal region of the nucleus basalis in rat brain slices. *J Neurophysiol*,  
772 *83*(5), 2649-2660. doi:10.1152/jn.2000.83.5.2649
- 773 Bevan, M. D., Magill, P. J., Hallworth, N. E., Bolam, J. P., & Wilson, C. J. (2002). Regulation of the timing  
774 and pattern of action potential generation in rat subthalamic neurons in vitro by GABA-A IPSPs.  
775 *J Neurophysiol*, *87*(3), 1348-1362.
- 776 Bevan, M. D., Magill, P. J., Terman, D., Bolam, J. P., & Wilson, C. J. (2002). Move to the rhythm:  
777 oscillations in the subthalamic nucleus-external globus pallidus network. *Trends Neurosci*, *25*(10),  
778 525-531.

- 779 Bissonette, G. B., Powell, E. M., & Roesch, M. R. (2013). Neural structures underlying set-shifting: roles of  
780 medial prefrontal cortex and anterior cingulate cortex. *Behav Brain Res*, *250*, 91-101.  
781 doi:10.1016/j.bbr.2013.04.037
- 782 Bogacz, R., Martin Moraud, E., Abdi, A., Magill, P. J., & Baufreton, J. (2016). Properties of Neurons in  
783 External Globus Pallidus Can Support Optimal Action Selection. *PLoS Comput Biol*, *12*(7),  
784 e1005004. doi:10.1371/journal.pcbi.1005004
- 785 Bolam, J. P., Hanley, J. J., Booth, P. A., & Bevan, M. D. (2000). Synaptic organisation of the basal ganglia.  
786 *J Anat*, *196 (Pt 4)*, 527-542.
- 787 Bostan, A. C., Dum, R. P., & Strick, P. L. (2013). Cerebellar networks with the cerebral cortex and basal  
788 ganglia. *Trends Cogn Sci*, *17*(5), 241-254. doi:10.1016/j.tics.2013.03.003
- 789 Brown, A. R., & Teskey, G. C. (2014). Motor cortex is functionally organized as a set of spatially distinct  
790 representations for complex movements. *J Neurosci*, *34*(41), 13574-13585.  
791 doi:10.1523/JNEUROSCI.2500-14.2014
- 792 Bugaysen, J., Bar-Gad, I., & Korngreen, A. (2013). Continuous modulation of action potential firing by a  
793 unitary GABAergic connection in the globus pallidus in vitro. *J Neurosci*, *33*(31), 12805-12809.  
794 doi:10.1523/JNEUROSCI.1970-13.2013
- 795 Calabresi, P., Picconi, B., Tozzi, A., Ghiglieri, V., & Di Filippo, M. (2014). Direct and indirect pathways of  
796 basal ganglia: a critical reappraisal. *Nat Neurosci*, *17*(8), 1022-1030. doi:10.1038/nn.3743
- 797 Canteras, N. S., Shammah-Lagnado, S. J., Silva, B. A., & Ricardo, J. A. (1990). Afferent connections of the  
798 subthalamic nucleus: a combined retrograde and anterograde horseradish peroxidase study in the  
799 rat. *Brain Res*, *513*(1), 43-59.
- 800 Cao, V. Y., Ye, Y., Mastwal, S., Ren, M., Coon, M., Liu, Q., . . . Wang, K. H. (2015). Motor Learning  
801 Consolidates Arc-Expressing Neuronal Ensembles in Secondary Motor Cortex. *Neuron*, *86*(6),  
802 1385-1392. doi:10.1016/j.neuron.2015.05.022
- 803 Cooper, A. J., & Stanford, I. M. (2000). Electrophysiological and morphological characteristics of three  
804 subtypes of rat globus pallidus neurone in vitro. *J Physiol*, *527 Pt 2*, 291-304.
- 805 Crittenden, J. R., & Graybiel, A. M. (2011). Basal Ganglia disorders associated with imbalances in the  
806 striatal striosome and matrix compartments. *Front Neuroanat*, *5*, 59.  
807 doi:10.3389/fnana.2011.00059
- 808 Cui, G., Jun, S. B., Jin, X., Pham, M. D., Vogel, S. S., Lovinger, D. M., & Costa, R. M. (2013). Concurrent  
809 activation of striatal direct and indirect pathways during action initiation. *Nature*, *494*(7436),  
810 238-242. doi:10.1038/nature11846
- 811 DeLong, M. R. (1971). Activity of pallidal neurons during movement. *J Neurophysiol*, *34*(3), 414-427.  
812 doi:10.1152/jn.1971.34.3.414
- 813 DeLong, M. R. (1990). Primate models of movement disorders of basal ganglia origin. *Trends Neurosci*, *13*,  
814 281-285.
- 815 Dodson, P. D., Larvin, J. T., Duffell, J. M., Garas, F. N., Doig, N. M., Kessar, N., . . . Magill, P. J. (2015).  
816 Distinct developmental origins manifest in the specialized encoding of movement by adult

- 817 neurons of the external globus pallidus. *Neuron*, *86*(2), 501-513. doi:10.1016/j.neuron.2015.03.007
- 818 Ebbesen, C. L., Insanally, M. N., Kopec, C. D., Murakami, M., Saiki, A., & Erlich, J. C. (2018). More than  
819 Just a "Motor": Recent Surprises from the Frontal Cortex. *J Neurosci*, *38*(44), 9402-9413.  
820 doi:10.1523/JNEUROSCI.1671-18.2018
- 821 Eblen, F., & Graybiel, A. M. (1995). Highly restricted origin of prefrontal cortical inputs to striosomes in  
822 the macaque monkey. *J Neurosci*, *15*(9), 5999-6013.
- 823 Ebrahimi, A., Pochet, R., & Roger, M. (1992). Topographical organization of the projections from  
824 physiologically identified areas of the motor cortex to the striatum in the rat. *Neurosci Res*, *14*(1),  
825 39-60.
- 826 Edgerton, J. R., Hanson, J. E., Gunay, C., & Jaeger, D. (2010). Dendritic sodium channels regulate  
827 network integration in globus pallidus neurons: a modeling study. *J Neurosci*, *30*(45),  
828 15146-15159. doi:10.1523/JNEUROSCI.2662-10.2010
- 829 Elias, S., Joshua, M., Goldberg, J. A., Heimer, G., Arkadir, D., Morris, G., & Bergman, H. (2007).  
830 Statistical properties of pauses of the high-frequency discharge neurons in the external segment  
831 of the globus pallidus. *J Neurosci*, *27*(10), 2525-2538. doi:10.1523/JNEUROSCI.4156-06.2007
- 832 Ermentrout, B. (1996). Type I membranes, phase resetting curves, and synchrony. *Neural Comput*, *8*(5),  
833 979-1001.
- 834 Frank, M. J., Samanta, J., Moustafa, A. A., & Sherman, S. J. (2007). Hold your horses: impulsivity, deep  
835 brain stimulation, and medication in parkinsonism. *Science*, *318*(5854), 1309-1312.  
836 doi:10.1126/science.1146157
- 837 Friedman, A., Homma, D., Gibb, L. G., Amemori, K., Rubin, S. J., Hood, A. S., . . . Graybiel, A. M. (2015). A  
838 Corticostriatal Path Targeting Striosomes Controls Decision-Making under Conflict. *Cell*, *161*(6),  
839 1320-1333. doi:10.1016/j.cell.2015.04.049
- 840 Friend, D. M., & Kravitz, A. V. (2014). Working together: basal ganglia pathways in action selection.  
841 *Trends Neurosci*, *37*(6), 301-303. doi:10.1016/j.tins.2014.04.004
- 842 Fujiyama, F., Nakano, T., Matsuda, W., Furuta, T., Udagawa, J., & Kaneko, T. (2015). A single-neuron  
843 tracing study of arky pallidal and prototypic neurons in healthy rats. *Brain Struct Funct*.  
844 doi:10.1007/s00429-015-1152-2
- 845 Fujiyama, F., Sohn, J., Nakano, T., Furuta, T., Nakamura, K. C., Matsuda, W., & Kaneko, T. (2011).  
846 Exclusive and common targets of neostriatofugal projections of rat striosome neurons: a single  
847 neuron-tracing study using a viral vector. *Eur J Neurosci*, *33*(4), 668-677.  
848 doi:10.1111/j.1460-9568.2010.07564.x
- 849 Fujiyama, F., Takahashi, S., & Karube, F. (2015). Morphological elucidation of basal ganglia circuits  
850 contributing reward prediction. *Front Neurosci*, *9*, 6. doi:10.3389/fnins.2015.00006
- 851 Fujiyama, F., Unzai, T., Nakamura, K., Nomura, S., & Kaneko, T. (2006). Difference in organization of  
852 corticostriatal and thalamostriatal synapses between patch and matrix compartments of rat  
853 neostriatum. *Eur J Neurosci*, *24*(10), 2813-2824. doi:10.1111/j.1460-9568.2006.05177.x
- 854 Gabbott, P. L., Warner, T. A., Jays, P. R., Salway, P., & Busby, S. J. (2005). Prefrontal cortex in the rat:

- 855 projections to subcortical autonomic, motor, and limbic centers. *J Comp Neurol*, *492*(2), 145-177.  
856 doi:10.1002/cne.20738
- 857 Gerfen, C. R. (1985). The neostriatal mosaic. I. Compartmental organization of projections from the  
858 striatum to the substantia nigra in the rat. *J Comp Neurol*, *236*(4), 454-476.  
859 doi:10.1002/cne.902360404
- 860 Gittis, A. H., Berke, J. D., Bevan, M. D., Chan, C. S., Mallet, N., Morrow, M. M., & Schmidt, R. (2014).  
861 New roles for the external globus pallidus in basal ganglia circuits and behavior. *J Neurosci*,  
862 *34*(46), 15178-15183. doi:10.1523/JNEUROSCI.3252-14.2014
- 863 Glajch, K. E., Kelper, D. A., Hegeman, D. J., Cui, Q., Xenias, H. S., Augustine, E. C., . . . Chan, C. S. (2016).  
864 Npas1+ Pallidal Neurons Target Striatal Projection Neurons. *J Neurosci*, *36*(20), 5472-5488.  
865 doi:10.1523/JNEUROSCI.1720-15.2016
- 866 Goldberg, J. A., & Bergman, H. (2011). Computational physiology of the neural networks of the primate  
867 globus pallidus: function and dysfunction. *Neuroscience*, *198*, 171-192.  
868 doi:10.1016/j.neuroscience.2011.08.068
- 869 Goldberg, J. A., Kats, S. S., & Jaeger, D. (2003). Globus pallidus discharge is coincident with striatal  
870 activity during global slow wave activity in the rat. *J Neurosci*, *23*(31), 10058-10063.  
871 doi:10.1523/JNEUROSCI.23-31-10058.2003
- 872 Gradinaru, V., Mogri, M., Thompson, K. R., Henderson, J. M., & Deisseroth, K. (2009). Optical  
873 deconstruction of parkinsonian neural circuitry. *Science*, *324*(5925), 354-359.  
874 doi:10.1126/science.1167093
- 875 Guo, Z. V., Li, N., Huber, D., Ophir, E., Gutnisky, D., Ting, J. T., . . . Svoboda, K. (2014). Flow of cortical  
876 activity underlying a tactile decision in mice. *Neuron*, *81*(1), 179-194.  
877 doi:10.1016/j.neuron.2013.10.020
- 878 Hanson, J. E., Smith, Y., & Jaeger, D. (2004). Sodium channels and dendritic spike initiation at excitatory  
879 synapses in globus pallidus neurons. *J Neurosci*, *24*(2), 329-340.  
880 doi:10.1523/JNEUROSCI.3937-03.2004
- 881 Haynes, W. I., & Haber, S. N. (2013). The organization of prefrontal-subthalamic inputs in primates  
882 provides an anatomical substrate for both functional specificity and integration: implications for  
883 Basal Ganglia models and deep brain stimulation. *J Neurosci*, *33*(11), 4804-4814.  
884 doi:10.1523/JNEUROSCI.4674-12.2013
- 885 Hegeman, D. J., Hong, E. S., Hernandez, V. M., & Chan, C. S. (2016). The external globus pallidus:  
886 progress and perspectives. *Eur J Neurosci*, *43*(10), 1239-1265. doi:10.1111/ejn.13196
- 887 Heilbronner, S. R., Meyer, M. A. A., Choi, E. Y., & Haber, S. N. (2018). How do cortico-striatal projections  
888 impact on downstream pallidal circuitry? *Brain Struct Funct*, *223*(6), 2809-2821.  
889 doi:10.1007/s00429-018-1662-9
- 890 Heindorf, M., Arber, S., & Keller, G. B. (2018). Mouse Motor Cortex Coordinates the Behavioral Response  
891 to Unpredicted Sensory Feedback. *Neuron*, *99*(5), 1040-1054 e1045.  
892 doi:10.1016/j.neuron.2018.07.046

- 893 Hernandez, V. M., Hegeman, D. J., Cui, Q., Kolver, D. A., Fiske, M. P., Glajch, K. E., . . . Chan, C. S. (2015).  
894 Parvalbumin+ Neurons and Npas1+ Neurons Are Distinct Neuron Classes in the Mouse External  
895 Globus Pallidus. *J Neurosci*, *35*(34), 11830-11847. doi:10.1523/JNEUROSCI.4672-14.2015
- 896 Hikosaka, O. (2007). GABAergic output of the basal ganglia. *Prog Brain Res*, *160*, 209-226.
- 897 Hintiryan, H., Foster, N. N., Bowman, I., Bay, M., Song, M. Y., Gou, L., . . . Dong, H. W. (2016). The mouse  
898 cortico-striatal projectome. *Nat Neurosci*, *19*(8), 1100-1114. doi:10.1038/nn.4332
- 899 Hira, R., Ohkubo, F., Masamizu, Y., Ohkura, M., Nakai, J., Okada, T., & Matsuzaki, M. (2014).  
900 Reward-timing-dependent bidirectional modulation of cortical microcircuits during optical  
901 single-neuron operant conditioning. *Nat Commun*, *5*, 5551. doi:10.1038/ncomms6551
- 902 Hira, R., Ohkubo, F., Ozawa, K., Isomura, Y., Kitamura, K., Kano, M., . . . Matsuzaki, M. (2013).  
903 Spatiotemporal dynamics of functional clusters of neurons in the mouse motor cortex during a  
904 voluntary movement. *J Neurosci*, *33*(4), 1377-1390. doi:10.1523/JNEUROSCI.2550-12.2013
- 905 Hontanilla, B., Parent, A., de las Heras, S., & Gimenez-Amaya, J. M. (1998). Distribution of calbindin  
906 D-28k and parvalbumin neurons and fibers in the rat basal ganglia. *Brain Res Bull*, *47*(2),  
907 107-116.
- 908 Hooks, B. M., Papale, A. E., Paletzki, R. F., Feroze, M. W., Eastwood, B. S., Couey, J. J., . . . Gerfen, C. R.  
909 (2018). Topographic precision in sensory and motor corticostriatal projections varies across cell  
910 type and cortical area. *Nat Commun*, *9*(1), 3549. doi:10.1038/s41467-018-05780-7
- 911 Hunnicutt, B. J., Jongbloets, B. C., Birdsong, W. T., Gertz, K. J., Zhong, H., & Mao, T. (2016). A  
912 comprehensive excitatory input map of the striatum reveals novel functional organization. *Elife*, *5*.  
913 doi:10.7554/eLife.19103
- 914 Isoda, M., & Hikosaka, O. (2008). Role for subthalamic nucleus neurons in switching from automatic to  
915 controlled eye movement. *J Neurosci*, *28*(28), 7209-7218. doi:10.1523/JNEUROSCI.0487-08.2008
- 916 Isomura, Y., Takekawa, T., Harukuni, R., Handa, T., Aizawa, H., Takada, M., & Fukai, T. (2013).  
917 Reward-modulated motor information in identified striatum neurons. *J Neurosci*, *33*(25),  
918 10209-10220. doi:10.1523/JNEUROSCI.0381-13.2013
- 919 Jaeger, D., & Kita, H. (2011). Functional connectivity and integrative properties of globus pallidus  
920 neurons. *Neuroscience*, *198*, 44-53. doi:10.1016/j.neuroscience.2011.07.050
- 921 Janssen, M. L. F., Temel, Y., Delaville, C., Zwartjes, D. G. M., Heida, T., De Deurwaerdere, P., . . .  
922 Benazzouz, A. (2017). Cortico-subthalamic inputs from the motor, limbic, and associative areas in  
923 normal and dopamine-depleted rats are not fully segregated. *Brain Struct Funct*, *222*(6),  
924 2473-2485. doi:10.1007/s00429-016-1351-5
- 925 Kawaguchi, Y., Wilson, C. J., & Emson, P. C. (1990). Projection subtypes of rat neostriatal matrix cells  
926 revealed by intracellular injection of biocytin. *J Neurosci*, *10*(10), 3421-3438.
- 927 Kawai, R., Markman, T., Poddar, R., Ko, R., Fantana, A. L., Dhawale, A. K., . . . Olveczky, B. P. (2015).  
928 Motor cortex is required for learning but not for executing a motor skill. *Neuron*, *86*(3), 800-812.  
929 doi:10.1016/j.neuron.2015.03.024
- 930 Kelly, R. M., & Strick, P. L. (2004). Macro-architecture of basal ganglia loops with the cerebral cortex: use

- 931 of rabies virus to reveal multisynaptic circuits. *Prog Brain Res*, *143*, 449-459.
- 932 Kim, H. F., Ghazizadeh, A., & Hikosaka, O. (2014). Separate groups of dopamine neurons innervate  
933 caudate head and tail encoding flexible and stable value memories. *Front Neuroanat*, *8*, 120.  
934 doi:10.3389/fnana.2014.00120
- 935 Kincaid, A. E., & Wilson, C. J. (1996). Corticostriatal innervation of the patch and matrix in the rat  
936 neostriatum. *J Comp Neurol*, *374*(4), 578-592.  
937 doi:10.1002/(SICI)1096-9861(19961028)374:4<578::AID-CNE7>3.0.CO;2-Z
- 938 Kita, H. (2007). Globus pallidus external segment. *Prog Brain Res*, *160*, 111-133.
- 939 Kita, H., & Kita, T. (2001). Number, origins, and chemical types of rat pallidostriatal projection neurons. *J*  
940 *Comp Neurol*, *437*(4), 438-448.
- 941 Kita, T., & Kita, H. (2012). The subthalamic nucleus is one of multiple innervation sites for long-range  
942 corticofugal axons: a single-axon tracing study in the rat. *J Neurosci*, *32*(17), 5990-5999.  
943 doi:10.1523/JNEUROSCI.5717-11.2012
- 944 Lévesque, M., Bédard, A., Cossette, M., & Parent, A. (2003). Novel aspects of the chemical anatomy of the  
945 striatum and its efferents projections. *J Chem Neuroanat*, *26*(4), 271-281.  
946 doi:10.1016/j.jchemneu.2003.07.001
- 947 Lerner, T. N., Shilyansky, C., Davidson, T. J., Evans, K. E., Beier, K. T., Zalocusky, K. A., . . . Deisseroth, K.  
948 (2015). Intact-Brain Analyses Reveal Distinct Information Carried by SNc Dopamine Subcircuits.  
949 *Cell*, *162*(3), 635-647. doi:10.1016/j.cell.2015.07.014
- 950 Li, N., Chen, T. W., Guo, Z. V., Gerfen, C. R., & Svoboda, K. (2015). A motor cortex circuit for motor  
951 planning and movement. *Nature*, *519*(7541), 51-56. doi:10.1038/nature14178
- 952 Mailly, P., Aliane, V., Groenewegen, H. J., Haber, S. N., & Deniau, J. M. (2013). The rat prefrontostriatal  
953 system analyzed in 3D: evidence for multiple interacting functional units. *J Neurosci*, *33*(13),  
954 5718-5727. doi:10.1523/JNEUROSCI.5248-12.2013
- 955 Makino, H., Hwang, E. J., Hedrick, N. G., & Komiyama, T. (2016). Circuit Mechanisms of Sensorimotor  
956 Learning. *Neuron*, *92*(4), 705-721. doi:10.1016/j.neuron.2016.10.029
- 957 Makino, H., Ren, C., Liu, H., Kim, A. N., Kondapaneni, N., Liu, X., . . . Komiyama, T. (2017).  
958 Transformation of Cortex-wide Emergent Properties during Motor Learning. *Neuron*, *94*(4),  
959 880-890 e888. doi:10.1016/j.neuron.2017.04.015
- 960 Mallet, N., Micklem, B. R., Henny, P., Brown, M. T., Williams, C., Bolam, J. P., . . . Magill, P. J. (2012).  
961 Dichotomous organization of the external globus pallidus. *Neuron*, *74*(6), 1075-1086.  
962 doi:10.1016/j.neuron.2012.04.027
- 963 Mallet, N., Schmidt, R., Leventhal, D., Chen, F., Amer, N., Boraud, T., & Berke, J. D. (2016). Arky pallidal  
964 Cells Send a Stop Signal to Striatum. *Neuron*. doi:10.1016/j.neuron.2015.12.017
- 965 Manita, S., Suzuki, T., Homma, C., Matsumoto, T., Odagawa, M., Yamada, K., . . . Murayama, M. (2015). A  
966 Top-Down Cortical Circuit for Accurate Sensory Perception. *Neuron*, *86*(5), 1304-1316.  
967 doi:10.1016/j.neuron.2015.05.006
- 968 Mastro, K. J., Bouchard, R. S., Holt, H. A., & Gittis, A. H. (2014). Transgenic mouse lines subdivide



- 969 external segment of the globus pallidus (GPe) neurons and reveal distinct GPe output pathways. *J*  
970 *Neurosci*, *34*(6), 2087-2099. doi:10.1523/JNEUROSCI.4646-13.2014
- 971 Mastro, K. J., Zitelli, K. T., Willard, A. M., Leblanc, K. H., Kravitz, A. V., & Gittis, A. H. (2017).  
972 Cell-specific pallidal intervention induces long-lasting motor recovery in dopamine-depleted mice.  
973 *Nat Neurosci*, *20*(6), 815-823. doi:10.1038/nn.4559
- 974 Mathai, A., & Smith, Y. (2011). The corticostriatal and corticosubthalamic pathways: two entries, one  
975 target. So what? *Front Syst Neurosci*, *5*, 64. doi:10.3389/fnsys.2011.00064
- 976 Matsumoto, M., & Hikosaka, O. (2009). Two types of dopamine neuron distinctly convey positive and  
977 negative motivational signals. *Nature*, *459*(7248), 837-841. doi:10.1038/nature08028
- 978 Menegas, W., Bergan, J. F., Ogawa, S. K., Isogai, Y., Umadevi Venkataraju, K., Osten, P., . . .  
979 Watabe-Uchida, M. (2015). Dopamine neurons projecting to the posterior striatum form an  
980 anatomically distinct subclass. *Elife*, *4*, e10032. doi:10.7554/eLife.10032
- 981 Middleton, F. A., & Strick, P. L. (2000). Basal ganglia and cerebellar loops: motor and cognitive circuits.  
982 *Brain Res Brain Res Rev*, *31*(2-3), 236-250.
- 983 Middleton, F. A., & Strick, P. L. (2002). Basal-ganglia 'projections' to the prefrontal cortex of the primate.  
984 *Cereb Cortex*, *12*(9), 926-935.
- 985 Milardi, D., Gaeta, M., Marino, S., Arrigo, A., Vaccarino, G., Mormina, E., . . . Quartarone, A. (2015). Basal  
986 ganglia network by constrained spherical deconvolution: a possible cortico-pallidal pathway? *Mov*  
987 *Disord*, *30*(3), 342-349. doi:10.1002/mds.25995
- 988 Mimica, B., Dunn, B. A., Tombaz, T., Bojja, V., & Whitlock, J. R. (2018). Efficient cortical coding of 3D  
989 posture in freely behaving rats. *Science*, *362*(6414), 584-589. doi:10.1126/science.aau2013
- 990 Mink, J. W., & Thach, W. T. (1991a). Basal ganglia motor control. I. Nonexclusive relation of pallidal  
991 discharge to five movement modes. *J Neurophysiol*, *65*(2), 273-300. doi:10.1152/jn.1991.65.2.273
- 992 Mink, J. W., & Thach, W. T. (1991b). Basal ganglia motor control. II. Late pallidal timing relative to  
993 movement onset and inconsistent pallidal coding of movement parameters. *J Neurophysiol*, *65*(2),  
994 301-329. doi:10.1152/jn.1991.65.2.301
- 995 Miyamoto, D., Hirai, D., Fung, C. C., Inutsuka, A., Odagawa, M., Suzuki, T., . . . Murayama, M. (2016).  
996 Top-down cortical input during NREM sleep consolidates perceptual memory. *Science*, *352*(6291),  
997 1315-1318. doi:10.1126/science.aaf0902
- 998 Miyamoto, Y., & Fukuda, T. (2015). Immunohistochemical study on the neuronal diversity and  
999 three-dimensional organization of the mouse entopeduncular nucleus. *Neurosci Res*, *94*, 37-49.  
1000 doi:10.1016/j.neures.2015.02.006
- 1001 Mizutani, K., Takahashi, S., Okamoto, S., Karube, F., & Fujiyama, F. (2017). Substance P effects  
1002 exclusively on prototypic neurons in mouse globus pallidus. *Brain Struct Funct*, *222*(9), 4089-4110.  
1003 doi:10.1007/s00429-017-1453-8
- 1004 Murakami, M., Shteingart, H., Loewenstein, Y., & Mainen, Z. F. (2017). Distinct Sources of Deterministic  
1005 and Stochastic Components of Action Timing Decisions in Rodent Frontal Cortex. *Neuron*, *94*(4),  
1006 908-919 e907. doi:10.1016/j.neuron.2017.04.040

- 1007 Murakami, M., Vicente, M. I., Costa, G. M., & Mainen, Z. F. (2014). Neural antecedents of self-initiated  
1008 actions in secondary motor cortex. *Nat Neurosci*, *17*(11), 1574-1582. doi:10.1038/nn.3826
- 1009 Nakayama, Y., Yokoyama, O., & Hoshi, E. (2015). Distinct neuronal organizations of the caudal cingulate  
1010 motor area and supplementary motor area in monkeys for ipsilateral and contralateral hand  
1011 movements. *J Neurophysiol*, *113*(7), 2845-2858. doi:10.1152/jn.00854.2014
- 1012 Naito, A., & Kita, H. (1994). The cortico-pallidal projection in the rat: an anterograde tracing study with  
1013 biotinylated dextran amine. *Brain Res*, *653*(1-2), 251-257.
- 1014 Nambu, A. (2007). Globus pallidus internal segment. . *Prog Brain Res*, *160*(135-150).
- 1015 Nambu, A. (2008). Seven problems on the basal ganglia. *Curr Opin Neurobiol*, *18*(6), 595-604.  
1016 doi:10.1016/j.conb.2008.11.001
- 1017 Nambu, A. (2011). Somatotopic organization of the primate Basal Ganglia. *Front Neuroanat*, *5*, 26.  
1018 doi:10.3389/fnana.2011.00026
- 1019 Nambu, A., Takada, M., Inase, M., & Tokuno, H. (1996). Dual somatotopical representations in the  
1020 primate subthalamic nucleus: evidence for ordered but reversed body-map transformations from  
1021 the primary motor cortex and the supplementary motor area. *J Neurosci*, *16*(8), 2671-2683.
- 1022 Nambu, A., Tokuno, H., Hamada, I., Kita, H., Imanishi, M., Akazawa, T., . . . Hasegawa, N. (2000).  
1023 Excitatory cortical inputs to pallidal neurons via the subthalamic nucleus in the monkey. *J*  
1024 *Neurophysiol*, *84*(1), 289-300.
- 1025 Nambu, A., Tokuno, H., Inase, M., & Takada, M. (1997). Corticosubthalamic input zones from forelimb  
1026 representations of the dorsal and ventral divisions of the premotor cortex in the macaque monkey:  
1027 comparison with the input zones from the primary motor cortex and the supplementary motor  
1028 area. *Neurosci Lett*, *239*(1), 13-16.
- 1029 Nambu, A., Tokuno, H., & Takada, M. (2002). Functional significance of the cortico-subthalamo-pallidal  
1030 'hyperdirect' pathway. *Neurosci Res*, *43*(2), 111-117.
- 1031 Oh, Y. M., Karube, F., Takahashi, S., Kobayashi, K., Takada, M., Uchigashima, M., . . . Fujiyama, F. (2017).  
1032 Using a novel PV-Cre rat model to characterize pallidonigral cells and their terminations. *Brain*  
1033 *Struct Funct*, *222*(5), 2359-2378. doi:10.1007/s00429-016-1346-2
- 1034 Parent, A., Fortin, M., Cote, P. Y., & Cicchetti, F. (1996). Calcium-binding proteins in primate basal  
1035 ganglia. *Neurosci Res*, *25*(4), 309-334.
- 1036 Parent, A., & Hazrati, L. N. (1995a). Functional anatomy of the basal ganglia. I. The cortico-basal  
1037 ganglia-thalamo-cortical loop. *Brain Res Brain Res Rev*, *20*(1), 91-127.
- 1038 Parent, A., & Hazrati, L. N. (1995b). Functional anatomy of the basal ganglia. II. The place of subthalamic  
1039 nucleus and external pallidum in basal ganglia circuitry. *Brain Res Brain Res Rev*, *20*(1), 128-154.
- 1040 Passingham, R. E., & Wise, S. P. (2012). *The neurobiology of prefrontal cortex. Anatomy, evolution, and*  
1041 *the origin of insight*. Oxford: Oxford University Press.
- 1042 Paus, T. (2001). Primate anterior cingulate cortex: where motor control, drive and cognition interface. *Nat*  
1043 *Rev Neurosci*, *2*(6), 417-424. doi:10.1038/35077500
- 1044 Paxinos, G., & Watson, C. (2007). *The rat brain in stereotaxic coordinates* (6th ed.). San Diego, USA:

1045 Academic Press.

- 1046 Petreanu, L., Mao, T., Sternson, S. M., & Svoboda, K. (2009). The subcellular organization of neocortical  
1047 excitatory connections. *Nature*, *457*(7233), 1142-1145. doi:10.1038/nature07709
- 1048 Rajakumar, N., Elisevich, K., & Flumerfelt, B. A. (1994). The pallidostriatal projection in the rat: a  
1049 recurrent inhibitory loop? *Brain Res*, *651*(1-2), 332-336.
- 1050 Rajakumar, N., Rushlow, W., Naus, C. C., Elisevich, K., & Flumerfelt, B. A. (1994). Neurochemical  
1051 compartmentalization of the globus pallidus in the rat: an immunocytochemical study of  
1052 calcium-binding proteins. *J Comp Neurol*, *346*(3), 337-348. doi:10.1002/cne.903460303
- 1053 Redgrave, P., Rodriguez, M., Smith, Y., Rodriguez-Oroz, M. C., Lehericy, S., Bergman, H., . . . Obeso, J. A.  
1054 (2010). Goal-directed and habitual control in the basal ganglia: implications for Parkinson's  
1055 disease. *Nat Rev Neurosci*, *11*(11), 760-772. doi:10.1038/nrn2915
- 1056 Reep, R. L., & Corwin, J. V. (1999). Topographic organization of the striatal and thalamic connections of  
1057 rat medial agranular cortex. *Brain Res*, *841*(1-2), 43-52.
- 1058 Reep, R. L., Wu, J. H., Cheatwood, J. L., Corwin, J. V., Kartje, G. L., & Mir, A. (2008). Quantification of  
1059 synaptic density in corticostriatal projections from rat medial agranular cortex. *Brain Res*, *1233*,  
1060 27-34. doi:10.1016/j.brainres.2008.07.059
- 1061 Rothman, J. S., & Silver, R. A. (2018). NeuroMatic: An Integrated Open-Source Software Toolkit for  
1062 Acquisition, Analysis and Simulation of Electrophysiological Data. *Front Neuroinform*, *12*, 14.  
1063 doi:10.3389/fninf.2018.00014
- 1064 Rouiller, E. M., Moret, V., & Liang, F. (1993). Comparison of the connectional properties of the two  
1065 forelimb areas of the rat sensorimotor cortex: support for the presence of a premotor or  
1066 supplementary motor cortical area. *Somatosens Mot Res*, *10*(3), 269-289.
- 1067 Sadek, A. R., Magill, P. J., & Bolam, J. P. (2007). A single-cell analysis of intrinsic connectivity in the rat  
1068 globus pallidus. *J Neurosci*, *27*(24), 6352-6362. doi:10.1523/JNEUROSCI.0953-07.2007
- 1069 Saiki, A., Kimura, R., Samura, T., Fujiwara-Tsukamoto, Y., Sakai, Y., & Isomura, Y. (2014). Different  
1070 modulation of common motor information in rat primary and secondary motor cortices. *PLoS One*,  
1071 *9*(6), e98662. doi:10.1371/journal.pone.0098662
- 1072 Schindelin, J., Arganda-Carreras, I., Frise, E., Kaynig, V., Longair, M., Pietzsch, T., . . . Cardona, A. (2012).  
1073 Fiji: an open-source platform for biological-image analysis. *Nat Methods*, *9*(7), 676-682.  
1074 doi:10.1038/nmeth.2019
- 1075 Schmidt, R., Leventhal, D. K., Mallet, N., Chen, F., & Berke, J. D. (2013). Canceling actions involves a  
1076 race between basal ganglia pathways. *Nat Neurosci*, *16*(8), 1118-1124. doi:10.1038/nn.3456
- 1077 Schoenbaum, G., Roesch, M. R., Stalnaker, T. A., & Takahashi, Y. K. (2009). A new perspective on the role  
1078 of the orbitofrontal cortex in adaptive behaviour. *Nat Rev Neurosci*, *10*(12), 885-892.  
1079 doi:10.1038/nrn2753
- 1080 Schultheiss, N. W., Edgerton, J. R., & Jaeger, D. (2010). Phase response curve analysis of a full  
1081 morphological globus pallidus neuron model reveals distinct perisomatic and dendritic modes of  
1082 synaptic integration. *J Neurosci*, *30*(7), 2767-2782. doi:10.1523/JNEUROSCI.3959-09.2010

- 1083 Shepherd, G. M. (2013). Corticostriatal connectivity and its role in disease. *Nat Rev Neurosci*, *14*(4),  
1084 278-291. doi:10.1038/nrn3469
- 1085 Shibata, K.-I., Tanaka, T., Hioki, H., & Furuta, T. (2018). Projection Patterns of Corticofugal Neurons  
1086 Associated with Vibrissa Movement. *eNeuro*, *5*(5), ENEURO.0190-0118.2018.  
1087 doi:10.1523/eneuro.0190-18.2018
- 1088 Shink, E., Bevan, M. D., Bolam, J. P., & Smith, Y. (1996). The subthalamic nucleus and the external  
1089 pallidum: two tightly interconnected structures that control the output of the basal ganglia in the  
1090 monkey. *Neuroscience*, *73*(2), 335-357.
- 1091 Shink, E., & Smith, Y. (1995). Differential synaptic innervation of neurons in the internal and external  
1092 segments of the globus pallidus by the GABA<sup>-</sup> and glutamate-containing terminals in the squirrel  
1093 monkey. *J Comp Neurol*, *358*(1), 119-141. doi:10.1002/cne.903580108
- 1094 Shipp, S. (2016). The functional logic of corticostriatal connections. *Brain Struct Funct*.  
1095 doi:10.1007/s00429-016-1250-9
- 1096 Shu, Y., Yu, Y., Yang, J., & McCormick, D. A. (2007). Selective control of cortical axonal spikes by a slowly  
1097 inactivating K<sup>+</sup> current. *Proc Natl Acad Sci U S A*, *104*(27), 11453-11458.  
1098 doi:10.1073/pnas.0702041104
- 1099 Smith, J. B., Klug, J. R., Ross, D. L., Howard, C. D., Hollon, N. G., Ko, V. I., . . . Jin, X. (2016).  
1100 Genetic-Based Dissection Unveils the Inputs and Outputs of Striatal Patch and Matrix  
1101 Compartments. *Neuron*, *91*(5), 1069-1084. doi:10.1016/j.neuron.2016.07.046
- 1102 Smith, Y., Bevan, M. D., Shink, E., & Bolam, J. P. (1998). Microcircuitry of the direct and indirect  
1103 pathways of the basal ganglia. *Neuroscience*, *86*(2), 353-387.
- 1104 Smith, Y., Raju, D. V., Pare, J. F., & Sidibe, M. (2004). The thalamostriatal system: a highly specific  
1105 network of the basal ganglia circuitry. *Trends Neurosci*, *27*(9), 520-527.  
1106 doi:10.1016/j.tins.2004.07.004
- 1107 Smith, Y., & Wichmann, T. (2015). The cortico-pallidal projection: an additional route for cortical  
1108 regulation of the basal ganglia circuitry. *Mov Disord*, *30*(3), 293-295. doi:10.1002/mds.26095
- 1109 Smith, Y., Wichmann, T., & DeLong, M. R. (2014). Corticostriatal and mesocortical dopamine systems: do  
1110 species differences matter? *Nat Rev Neurosci*, *15*(1), 63. doi:10.1038/nrn3469-c1
- 1111 Soma, S., Saiki, A., Yoshida, J., Rios, A., Kawabata, M., Sakai, Y., & Isomura, Y. (2017). Distinct Laterality  
1112 in Forelimb-Movement Representations of Rat Primary and Secondary Motor Cortical Neurons  
1113 with Intratelencephalic and Pyramidal Tract Projections. *J Neurosci*, *37*(45), 10904-10916.  
1114 doi:10.1523/JNEUROSCI.1188-17.2017
- 1115 Stanford, I. M. (2003). Independent neuronal oscillators of the rat globus pallidus. *J Neurophysiol*, *89*(3),  
1116 1713-1717. doi:10.1152/jn.00864.2002
- 1117 Sul, J. H., Jo, S., Lee, D., & Jung, M. W. (2011). Role of rodent secondary motor cortex in value-based  
1118 action selection. *Nat Neurosci*, *14*(9), 1202-1208. doi:10.1038/nn.2881
- 1119 Sul, J. H., Kim, H., Huh, N., Lee, D., & Jung, M. W. (2010). Distinct roles of rodent orbitofrontal and  
1120 medial prefrontal cortex in decision making. *Neuron*, *66*(3), 449-460.

- 1121 doi:10.1016/j.neuron.2010.03.033
- 1122 Svoboda, K., & Li, N. (2018). Neural mechanisms of movement planning: motor cortex and beyond. *Curr*  
1123 *Opin Neurobiol*, *49*, 33-41. doi:10.1016/j.conb.2017.10.023
- 1124 Tsumori, T., Yokota, S., Kishi, T., Qin, Y., Oka, T., & Yasui, Y. (2006). Insular cortical and amygdaloid  
1125 fibers are in contact with posterolateral hypothalamic neurons projecting to the nucleus of the  
1126 solitary tract in the rat. *Brain Res*, *1070*(1), 139-144. doi:10.1016/j.brainres.2005.11.040
- 1127 Turner, R. S., & Anderson, M. E. (1997). Pallidal discharge related to the kinematics of reaching  
1128 movements in two dimensions. *J Neurophysiol*, *77*(3), 1051-1074. doi:10.1152/jn.1997.77.3.1051
- 1129 Ueta, Y., Hirai, Y., Otsuka, T., & Kawaguchi, Y. (2013). Direction- and distance-dependent interareal  
1130 connectivity of pyramidal cell subpopulations in the rat frontal cortex. *Front Neural Circuits*, *7*,  
1131 164. doi:10.3389/fncir.2013.00164
- 1132 Ueta, Y., Otsuka, T., Morishima, M., Ushimaru, M., & Kawaguchi, Y. (2013). Multiple Layer 5 Pyramidal  
1133 Cell Subtypes Relay Cortical Feedback from Secondary to Primary Motor Areas in Rats. *Cereb*  
1134 *Cortex*. doi:10.1093/cercor/bht088
- 1135 van Dijk, K. J., Janssen, M. L., Zwartjes, D. G., Temel, Y., Visser-Vandewalle, V., Veltink, P. H., . . . Heida,  
1136 T. (2016). Spatial Localization of Sources in the Rat Subthalamic Motor Region Using an Inverse  
1137 Current Source Density Method. *Front Neural Circuits*, *10*, 87. doi:10.3389/fncir.2016.00087
- 1138 Viana Magno, L. A., Tenza-Ferrer, H., Collodetti, M., Felipe Guimaraes Aguiar, M., Paula Carneiro  
1139 Rodrigues, A., Souza da Silva, R., . . . Aurelio Romano-Silva, M. (2019). Optogenetic stimulation of  
1140 the M2 cortex reverts motor dysfunction in a mouse model of Parkinson's Disease. *J Neurosci*.  
1141 doi:10.1523/JNEUROSCI.2277-18.2019
- 1142 Vicente, A. M., Galvao-Ferreira, P., Tecuapetla, F., & Costa, R. M. (2016). Direct and indirect dorsolateral  
1143 striatum pathways reinforce different action strategies. *Curr Biol*, *26*(7), R267-269.  
1144 doi:10.1016/j.cub.2016.02.036
- 1145 Voorn, P., Vanderschuren, L. J., Groenewegen, H. J., Robbins, T. W., & Pennartz, C. M. (2004). Putting a  
1146 spin on the dorsal-ventral divide of the striatum. *Trends Neurosci*, *27*(8), 468-474.  
1147 doi:10.1016/j.tins.2004.06.006
- 1148 Wallace, M. L., Saunders, A., Huang, K. W., Philson, A. C., Goldman, M., Macosko, E. Z., . . . Sabatini, B. L.  
1149 (2017). Genetically Distinct Parallel Pathways in the Entopeduncular Nucleus for Limbic and  
1150 Sensorimotor Output of the Basal Ganglia. *Neuron*, *94*(1), 138-152 e135.  
1151 doi:10.1016/j.neuron.2017.03.017
- 1152 Wei, W., & Wang, X. J. (2016). Inhibitory Control in the Cortico-Basal Ganglia-Thalamocortical Loop:  
1153 Complex Regulation and Interplay with Memory and Decision Processes. *Neuron*, *92*(5),  
1154 1093-1105. doi:10.1016/j.neuron.2016.10.031
- 1155 Wichmann, T., & DeLong, M. R. (1996). Functional and pathophysiological models of the basal ganglia.  
1156 *Curr Opin Neurobiol*, *6*(6), 751-758.
- 1157 Wilson, C. J. (1986). Postsynaptic potentials evoked in spiny neostriatal projection neurons by stimulation  
1158 of ipsilateral and contralateral neocortex. *Brain Res*, *367*(1-2), 201-213.

- 1159 Wilson, C. J. (1987). Morphology and synaptic connections of crossed corticostriatal neurons in the rat. *J*  
1160 *Comp Neurol*, *263*(4), 567-580. doi:10.1002/cne.902630408
- 1161 Wise, S. P. (1985). The primate premotor cortex: past, present, and preparatory. *Annu Rev Neurosci*, *8*,  
1162 1-19. doi:10.1146/annurev.ne.08.030185.000245
- 1163 Wouterlood, F. G., Hartig, W., Groenewegen, H. J., & Voorn, P. (2012). Density gradients of vesicular  
1164 glutamate- and GABA transporter-immunoreactive boutons in calbindin and mu-opioid  
1165 receptor-defined compartments in the rat striatum. *J Comp Neurol*, *520*(10), 2123-2142.  
1166 doi:10.1002/cne.23031
- 1167 Wu, Y., Richard, S., & Parent, A. (2000). The organization of the striatal output system: a single-cell  
1168 juxtacellular labeling study in the rat. *Neurosci Res*, *38*(1), 49-62.
- 1169 Xiao, C., Miwa, J. M., Henderson, B. J., Wang, Y., Deshpande, P., McKinney, S. L., & Lester, H. A. (2015).  
1170 Nicotinic receptor subtype-selective circuit patterns in the subthalamic nucleus. *J Neurosci*, *35*(9),  
1171 3734-3746. doi:10.1523/JNEUROSCI.3528-14.2015
- 1172
- 1173

1174 **Figure legends**

1175 **Fig. 1.** Motor cortical axons project to the globus pallidus (GP).

1176 (A) A representative image of axons in the GP originated from the secondary motor cortex (M2),  
1177 labeled with biotinylated dextran amine (BDA; visualized in black). Axon collaterals in the GP are  
1178 predominantly distributed in the calbindin (CB)-negative subregions. CB is visualized in brown. (B)  
1179 Images and drawings of BDA injection sites into the primary and secondary motor areas (M1 and M2,  
1180 respectively). Tracer was deposited across the entire thickness of the cortex. (C) Images of axon  
1181 distributions in the GP, striatum, and subthalamic nucleus (STN) from M1 and M2. The sections  
1182 were counter-stained with an anti-parvalbumin (PV) antibody, visualized in brown. (D) Magnified  
1183 views of cortical axon varicosities (arrowheads) in the GP; **left**, M1 axons; **right**, M2 axons. The  
1184 images are composites from multiple focal planes, and show that the PV neurons are unlikely to be  
1185 contacted by axon varicosities. (E) Comparison of axon varicosity density in GP with that in the STN  
1186 and striatum ( $N = 3$  rats). The axon varicosity density in the GP as normalized values to that in the  
1187 STN (E1), or to that in the striatum (E2).

1188

1189 **Fig. 2.** Photoactivation of motor cortical terminals evokes excitation in GP neurons.

1190 (A) Schematic (**top**) of AAV encoding channel rhodopsin 2 and mCherry injection into the motor  
1191 cortex for *ex vivo* recordings using coronal slices. Examples of AAV injection sites are shown in the  
1192 **middle** panels (red). Images of immunofluorescence for neurofilament 200 kDa (N200, **bottom**),

1193 used for identification of the M1/M2 border (white dotted lines). (B1) A representative voltage clamp  
1194 trace (held at -60 mV) showing inward currents in GP neurons elicited by 5-ms blue light pulses (470  
1195 nm). (B2) A representative current clamp trace showing photoinduced action potentials and  
1196 excitatory postsynaptic potentials (EPSPs, arrowheads). (C) Cumulative histogram of the rheobase  
1197 current of GP neurons. Note that 25 to 30 pA is sufficient to elicit action potentials in half of GP  
1198 neurons ( $N = 100$ ). (D) Proportion of GP neurons innervated by M1 or M2 terminals. The number of  
1199 neurons is shown in bars. M2 more frequently innervated the GP than did M1. (E) Location of GP  
1200 neurons innervated by M1 (red circle) or M2 (blue circle). Note the topographic distribution of M1  
1201 and M2 innervation. The size of circles represents the amplitude of optically evoked currents,

1202

1203 **Fig. 3.** Cortico-pallidal connections are monosynaptic and glutamatergic.

1204 (A) The current induced by optogenetic stimulation of cortical terminals is monosynaptic and  
1205 glutamatergic. (A1) Representative traces of pharmacological effects on the light-induced inward  
1206 current. **Top**, no treatment; **Middle**, effects of TTX, 4AP, and gabazine; **Bottom**, effects of additional  
1207 application of glutamate receptor antagonists (CNQX, AP5). (A2) A summary plot of  
1208 pharmacological treatments ( $N = 10$  GP neurons from 4 rats). (B) Comparison of the time courses of  
1209 optogenetically evoked EPSCs (oEPSCs). (B1) Representative traces recorded from STN (black) and  
1210 GP (red) neurons. The GP and STN neurons were not recorded simultaneously. (B2-4) Summary  
1211 plots of oEPSC time courses in STN and GP neurons. (B2) The latency from light onset to oEPSC



1212 onset does not differ between STN and GP neurons (both  $N = 15$  neurons from 6 rats). The rise time  
1213 (B3) and the decay constant (B4) of oEPSCs ( $N = 15$  GP neurons and 12 STN neurons). Statistical  
1214 significance was examined by the Wilcoxon rank sum test. The STN and GP neurons were recorded  
1215 from the different brain slices of the same animal.

1216

1217 **Fig. 4.** Cell type-dependent cortical innervation of pallidal neurons

1218 (A) Schematic of *ex vivo* recordings from retrogradely labeled GP neurons to investigate the effect of  
1219 GP neuron projection type on cortical innervation. (B) Electrophysiological differences between GP  
1220 neurons projecting to the striatum ( $GP_{CPu}$ ) and STN ( $GP_{STN}$ ) (see also Table 1). (C) The proportion of  
1221 GP neurons innervated by M1 or M2 is correlated with projection type.  $GP_{CPu}$  neurons were more  
1222 often innervated by either M1 or M2 than were  $GP_{STN}$ . Significance was examined using Fisher's  
1223 exact test with a Bonferroni correction for multiple comparisons (\*\*\*,  $p < 0.00025$ ; \*\*,  $p < 0.0025$ ; \*,  
1224  $p < 0.0125$ ). (D) Amplitudes of oEPSCs in GP, STN, and striatal neurons. The amplitude in  $GP_{CPu}$   
1225 neurons is similar to that in STN neurons but smaller than that in striatal medium spiny neurons  
1226 (MSNs). From each rat, CPu, GP and STN neurons were recorded in the same experimental session.  
1227 Data obtained from M1 and M2 stimulation are summed. (E) Cumulative histograms of oEPSC  
1228 amplitude in  $GP_{CPu}$  and  $GP_{STN}$  neurons.  $GP_{CPu}$  neurons exhibit a greater optically evoked EPSC  
1229 (oEPSC) amplitude. (F) **Left**, amplitudes of oEPSCs induced in GP neurons by M1 terminal  
1230 stimulation. The  $GP_{CPu}$  group shows larger oEPSC amplitudes than the  $GP_{STN}$  group. **Right**,

1231 amplitudes of oEPSCs induced by M2 terminal stimulation. Significantly larger oEPSCs were again  
1232 recorded in the GP<sub>CPu</sub> group ( $p = 0.034$ ), but the difference is small. The neurons represented in Fig.  
1233 4 are not the same population as shown in Fig. 2, except for in Fig. 2C.

1234

1235 **Fig. 5.** Cortical inputs on bi-directional projection GP neurons (GP<sub>Bi</sub>)

1236 Two distinct retrograde tracers were injected into the STN and striatum (CPu), respectively. (A)  
1237 Three combinations of double immunofluorescence (PV/Lhx6, PV/FoxP2, and Lhx6/FoxP2) were  
1238 applied ( $N = 3$  rats). CPu-projecting GP neurons (GP<sub>CPu</sub>) expressed either FoxP2 or Lhx6  
1239 exclusively (A1), whereas STN-projecting GP neurons (GP<sub>STN</sub>) were mainly composed of PV- and/or  
1240 Lhx6- expressing neurons (A2). (A3) GP neurons projecting to both the CPu and STN (GP<sub>Bi</sub>)  
1241 frequently expressed Lhx6, but not FoxP2. (B) Triple immunofluorescence for GP<sub>CPu</sub> neurons ( $N = 2$ .  
1242 rats). Only a single retrograde tracer was injected into the striatum. (C) oEPSC amplitude of GP<sub>Bi</sub>  
1243 neurons ( $N = 3$  rats for each M1 and M2 labeling). Most of GP<sub>Bi</sub> exhibited small amplitude of  
1244 oEPSCs. Green and red retrobeads were injected into the CPu and STN, respectively. Confocal  
1245 images of a biocytin filled GP<sub>Bi</sub> neuron (arrowheads) are shown. AAV-labeled cortical axons also  
1246 show red fluorescence. (D) Cumulative histograms of oEPSC amplitude in GP<sub>Bi</sub> and GP<sub>CPu</sub> neurons.  
1247 The distributions are significantly different ( $p = 2.2 \times 10^{-16}$  by the Kolmogorov-Smirnov test). The  
1248 histogram of GP<sub>CPu</sub> neurons is the same as shown in Fig. 4E.

1249

1250 **Fig. 6.** Distribution of cortico-striatal axons in striatal subregions

1251 (A) Distribution of M1 cortico-striatal axons (magenta) in relation to calbindin (CB) expression

1252 (green). Sagittal sections at two mediolateral (M/L) coordinates are shown (A1, M/L 3.7 mm; A2,

1253 M/L 3.2 mm). Note that M1 axons were densely distributed in the dorsolateral striatum, where CB

1254 expression was weak. (B) M2 corticostriatal axons. M2 axons were distributed in the CB(+) and

1255 dorsal CB(-) subregions at M/L 3.7 mm (B1) and M/L 3.2 mm (B2). (C) Quantitative comparison of

1256 axon distributions between M1 and M2 (for each  $N = 3$  rats). (C1) Proportion of axon-containing

1257 pixels in the CB(+) striatum. M2 axons more frequently innervated the CB(+) striatum than did M1

1258 axons. (C2) Normalized fluorescence intensity in the CB(-) striatum, which reflects axon density,

1259 was not significantly different between M1 and M2. The dotted line at 1.0 indicates axon density in

1260 the CB(+) striatum. (D) Distribution of M1 axons in the striosome/matrix subregions of the striatum.

1261 Upper panel, M1 axons (magenta) are overlaid with  $\mu$ -opioid receptor (MOR) immunofluorescence

1262 (green). Dotted area in the panel is magnified in the bottom two panels. The fluorescence of M1

1263 axons (**bottom left**) and MOR (**bottom right**) is shown in grayscale. MOR immunopositive

1264 striosomes are contoured by white dotted lines. Note that M1 axons seemingly avoided the

1265 striosomes in both lateral (D1, M/L 3.4 mm) and medial (D2, M/L 2.8 mm) sections. (E) Distribution

1266 of M2 axons in the striatum, as described in (D). Note that in lateral sections (M/L 3.4 mm, E1), M2

1267 axons were uniformly distributed in both matrix and striosome, whereas in medial sections (M/L 2.8

1268 mm, E2), M2 axons were observed in dorsal but not ventral striosomes (arrowheads). (F) Normalized

1269 fluorescence intensity in the matrix ( $N = 3$  rats for each M1 and M2 labeling). M1 axons were more  
1270 densely distributed in the matrix in lateral sections ( $M/L > 2.9$  mm, F1), whereas both M1 and M2  
1271 preferentially innervated the matrix in medial sections ( $M/L \leq 2.9$  mm, F2). The dotted black line  
1272 represents axon density in the striosomes. The sections from the same rat were used for either CB or  
1273 MOR immunostaining.

1274

1275 **Fig. 7.** Distribution of cortico-subthalamic axons

1276 Images and drawings of BDA injection sites into rostral M1 (A1), caudal M1 (B1), M2 (C1), and  
1277 lateral orbitofrontal area (LO). LO injections often extended to the insular area. However, additional  
1278 experiments revealed that the insular cortex did not send many axons to the STN, as previously  
1279 reported (Tsumori et al., 2006). Cortical axons in STN are represented in two sagittal planes ( $M/L$  2.3  
1280 and 2.7 mm) for M1 (A2, B2), M2 (C2), and LO (D2). The gray dotted line indicates the boundary of  
1281 the STN. (E) Normalized distribution of cortical axons in the STN along the A/P (E1) or D/V axis  
1282 (E2). Data from sections  $M/L$  2.3 mm and 2.7 mm are pooled ( $N = 3$  rats for M1,  $N = 2$  for M2, and  
1283  $N = 2$  for LO). (F) Merged traces of axons from M1, M2, and LO ( $N = 2$  rats for each cortex). M1  
1284 (black) terminated in the central part of the STN, whereas M2 axons (green) were dense in the  
1285 posterior-ventral portion.

1286

1287 **Fig. 8.** Reciprocal projections between the striatum and GP

1288 Cholera toxin subunit B conjugated with Alexa-Fluor-488 (CTB488) was injected into the striatum  
1289 (CPu), either the CB(+) (A1) or CB(-) (B1) subregions. CTB488 can be transported in both  
1290 anterograde and retrograde directions. In the GP, anterogradely labeled terminals of medium spiny  
1291 neurons (MSNs) (arrowheads in A2 and B2) and labeled GP neurons projecting to the CPu  
1292 (arrowheads in A3 and B3) were observed. Reciprocal projections between CPu and GP correlated  
1293 with CB expression. Dotted lines show the boundary of the striatum (A1, B1), the GP (B2, C2), and  
1294 CB(+)/CB(-) subregions of the GP (A3, B3). Representative images from one rat for each are shown.

1295

1296 **Fig. 9.** Projections from GP to STN

1297 (A), (B), (C) **Left**, Images of BDA injection sites in the GP subregions. Sections containing the  
1298 injection core (arrowheads) were counterstained for CB (magenta). Thick dotted lines indicate the  
1299 borders of the GP, and thin dotted lines indicate the borders of CB(+) and CB(-) subregions of the GP.

1300 **Right**, Drawings of labeled GP axons in the STN. Labeled axons (black) in the STN were traced  
1301 over STN contours (green). Rostral GP projected to rostral STN (A;  $N = 3$  rats) and central GP to  
1302 central STN (B;  $N = 6$  rats). (C) In one case, we observed caudal GP projections to caudal STN ( $N =$

1303 1 rat). (D) Injection around the border between the GP and the internal capsule ( $N = 1$  rat). Axons in  
1304 the STN are uniformly distributed in the STN, probably due to labeling of fibers of passage from the  
1305 entire GP. Four to eight STN sections are overlaid for each case. Scales shown in A pertain also to B

1306 and C. The labeled axons do not include striatal MSN axons because the striatum does not project to

1307 the STN. Passing fibers of cortico-STN projections may also be labeled with tracer injections into the  
1308 GP; however, this is unlikely in our experiments because the morphology of axonal boutons in the  
1309 STN differed between cortical and GP injections (E), as reported in monkeys (Shink & Smith, 1995).

1310

1311 **Fig. 10.** Schematic drawings of the cortex-basal ganglia circuitry

1312 Diagram of cortico-basal ganglia-thalamus circuitry. The dotted lines represent the relatively weak  
1313 innervation reported in this study for cortex to GP<sub>STN</sub>, and for GP<sub>CPu</sub> to dMSNs (Glajch et al., 2016).

1314 The numbers in circles indicate estimated conduction times in millisecond (ms) (Jaeger & Kita,

1315 2011). (A) M1 activation induces excitation in the striatum, STN, and GP<sub>CPu</sub>. Due to the

1316 electrophysiological properties of the neurons, STN and GP may be activated faster than striatal

1317 neurons. (B) M2 activation conveys additional excitation to the GP<sub>STN</sub> neurons. Possible information

1318 flow related to the present study is shown by red lines. Note that inhibition from the GP is here

1319 considered faster (1 ms) than excitation from the STN (2–3 ms) (Jaeger & Kita, 2011). The actual

1320 timing of spike activity depends on neuron type, and excitation/inhibition interactions are complex.

1321 (C) Schematic of connections among the basal ganglia nuclei with relation to M1 and M2

1322 innervation.

1323

1324

1325 **Figure-figure supplement legends**

1326 **Fig. 1-figure supplement 1.** Example images of M2 projections to the striatum and GP (related to  
1327 Fig. 1).

1328 Using BDA injections into M2, labeled axons are visualized in black and CB immunoactivity in  
1329 brown. Axons are densely distributed in the striatum lateral to the midline (M/L 2.1–4.3 mm). In  
1330 more lateral sections, axons were denser in CB(-) subregions, and were also found in striosomes  
1331 (small CB[-] subregions) throughout the entire projection field (open arrowheads). In medial sections,  
1332 M2 axons were observed in both CB(+) and CB(-) subregions. M2 axons were only faintly detected  
1333 in ventral striosomes (filled arrowheads), whereas they were relatively dense in dorsal striosomes  
1334 (open arrowheads). Note also the presence of M2 axons in CB(-) portions of the GP (arrows).

1335

1336 **Fig. 1-figure supplement 2.** Cortico-pallidal projections are restricted to the ipsilateral hemisphere  
1337 (related to Fig. 1).

1338 Representative images of AAV-labeled cortical axons in the basal ganglia originating in M2, in both  
1339 hemispheres. **Left**, M2 axons were observed in the ipsilateral GP (**upper**) and STN (**lower**). In  
1340 contrast, no fluorescent signal was observed in contralateral GP (**upper**) or STN (**lower**). The images  
1341 in the contralateral hemisphere were captured with high exposures to better visualize brain structures,  
1342 because no fluorescent signal was detected there. GP, globus pallidus; STN subthalamic nucleus; ic,  
1343 internal capsule.

1344

1345 **Fig. 1-figure supplement 3.** Number of cortical boutons in the striatum, STN, and GP originating  
1346 from M1, M2, and LO (related to Fig. 1, also related to Fig. 5 and Supplementary Fig. 1).

1347

1348 **Fig. 7-figure supplement 1.** Representative distribution of STN-projecting cortical neurons (related  
1349 to Fig. 5).

1350 (A) **Left**, retrogradely labeled cortical neurons projecting to the STN. Note that many L5A neurons  
1351 were labeled in the frontal cortical area. **Right**, calbindin (CB) immunofluorescence (green) in the  
1352 same section. Cortical layers are indicated with Roman numerals. (B) Plots of STN-projecting  
1353 cortical neurons (black dots). Most labeled neurons are located in the frontal area including AI (the  
1354 anterior insular area), the Cg (cingulate area), the LO (lateral orbitofrontal area), M1 (primary motor  
1355 area), M2 (secondary motor area), and the VO (ventral orbitofrontal area). Some neurons are also  
1356 located in S1 (primary somatosensory area) and the RSD (retrosplenial dysgranular area). (C)  
1357 CTB555 was injected into the STN. ic, internal capsule; ZI, zona incerta. The effects of faint tracer  
1358 leak to cortex and thalamus are considered negligible because very few labeled neurons are observed  
1359 in L2/3 or L6, respectively.

1360



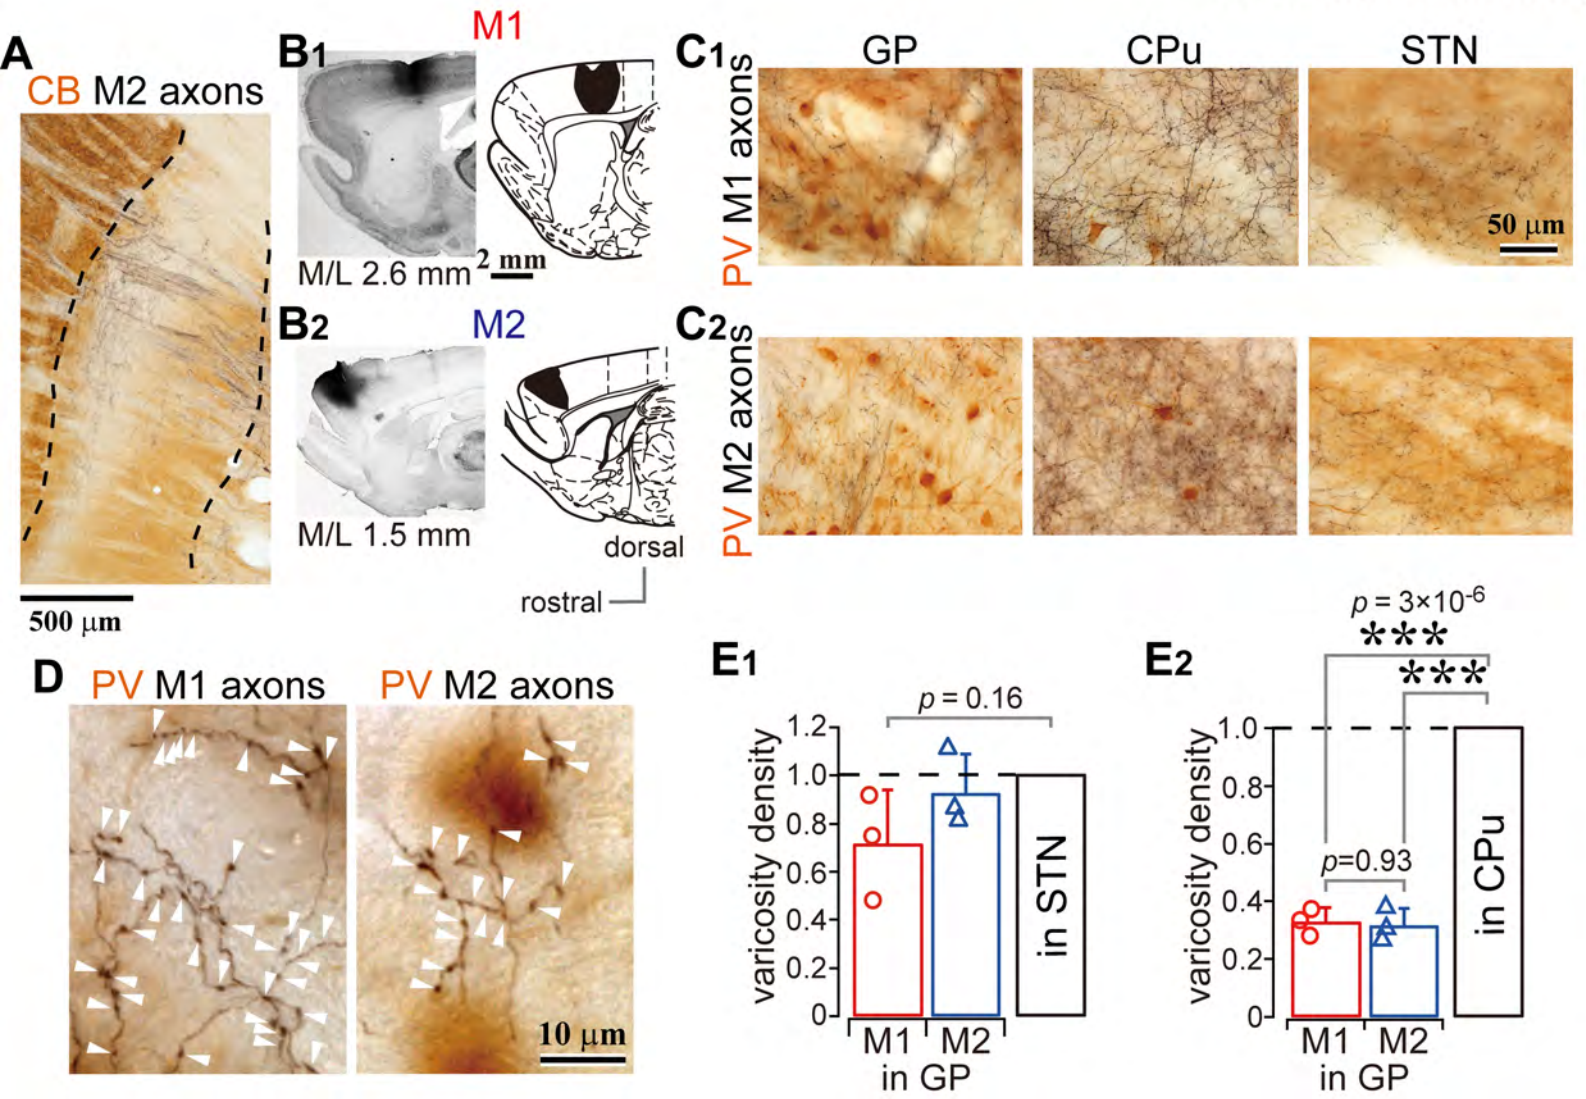

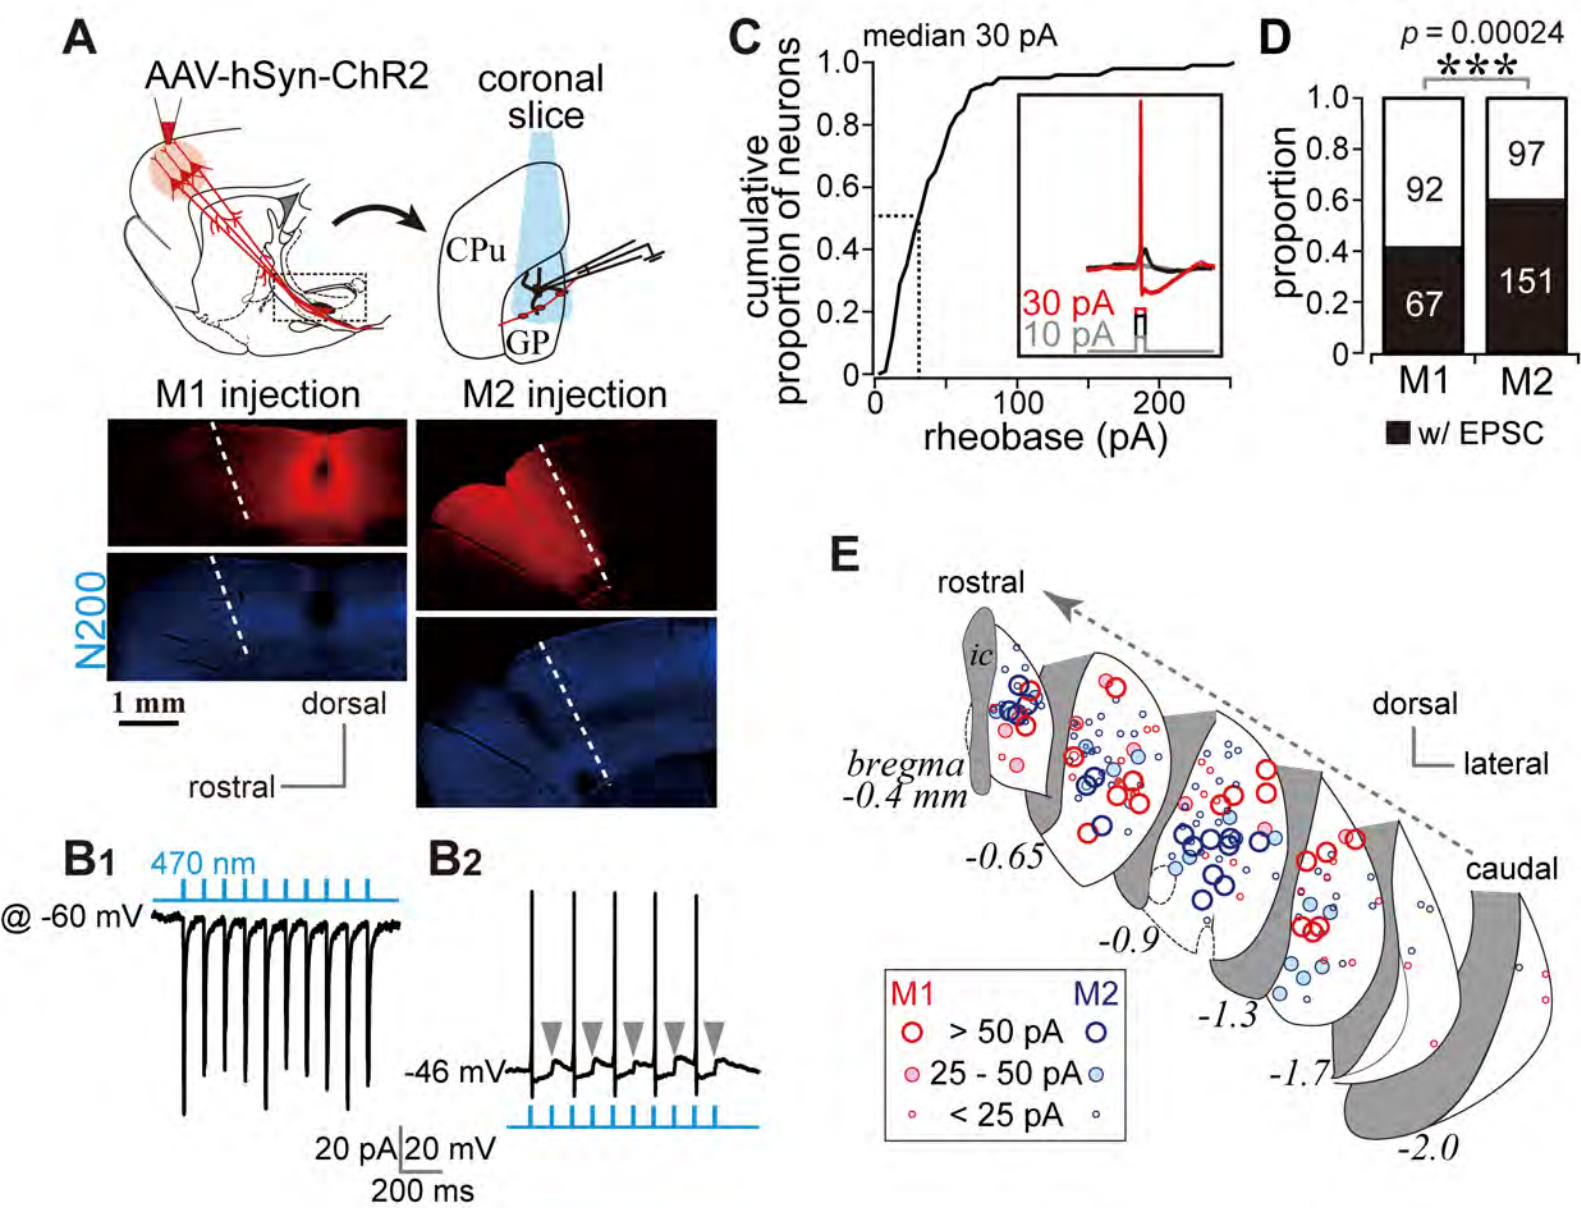

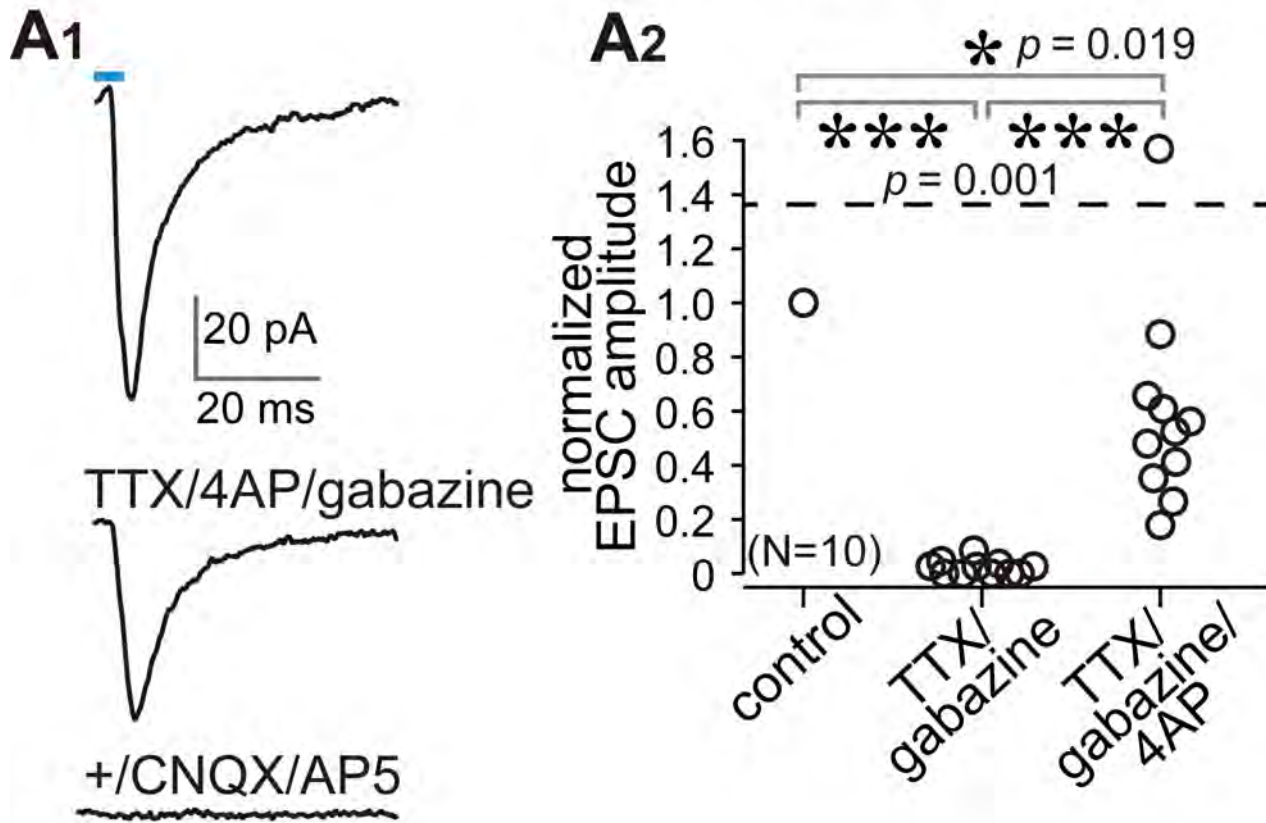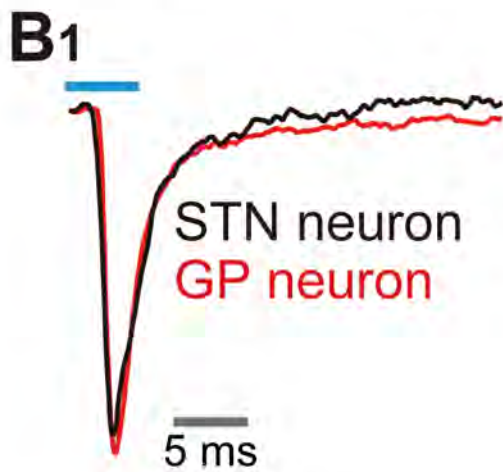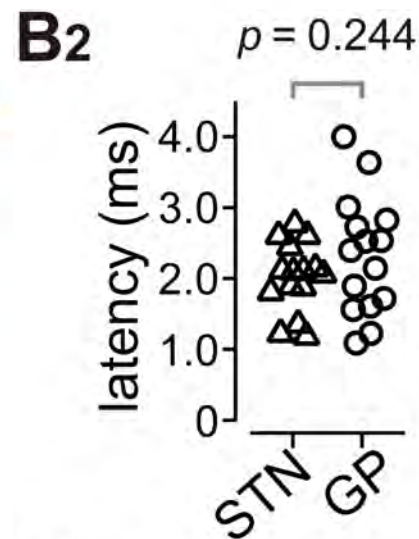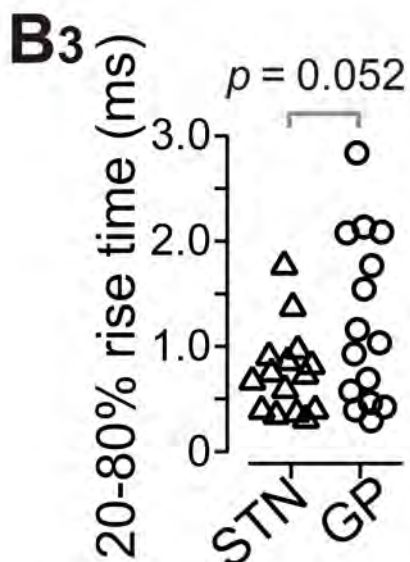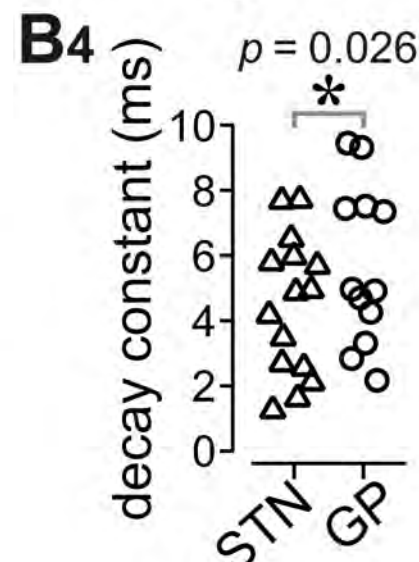

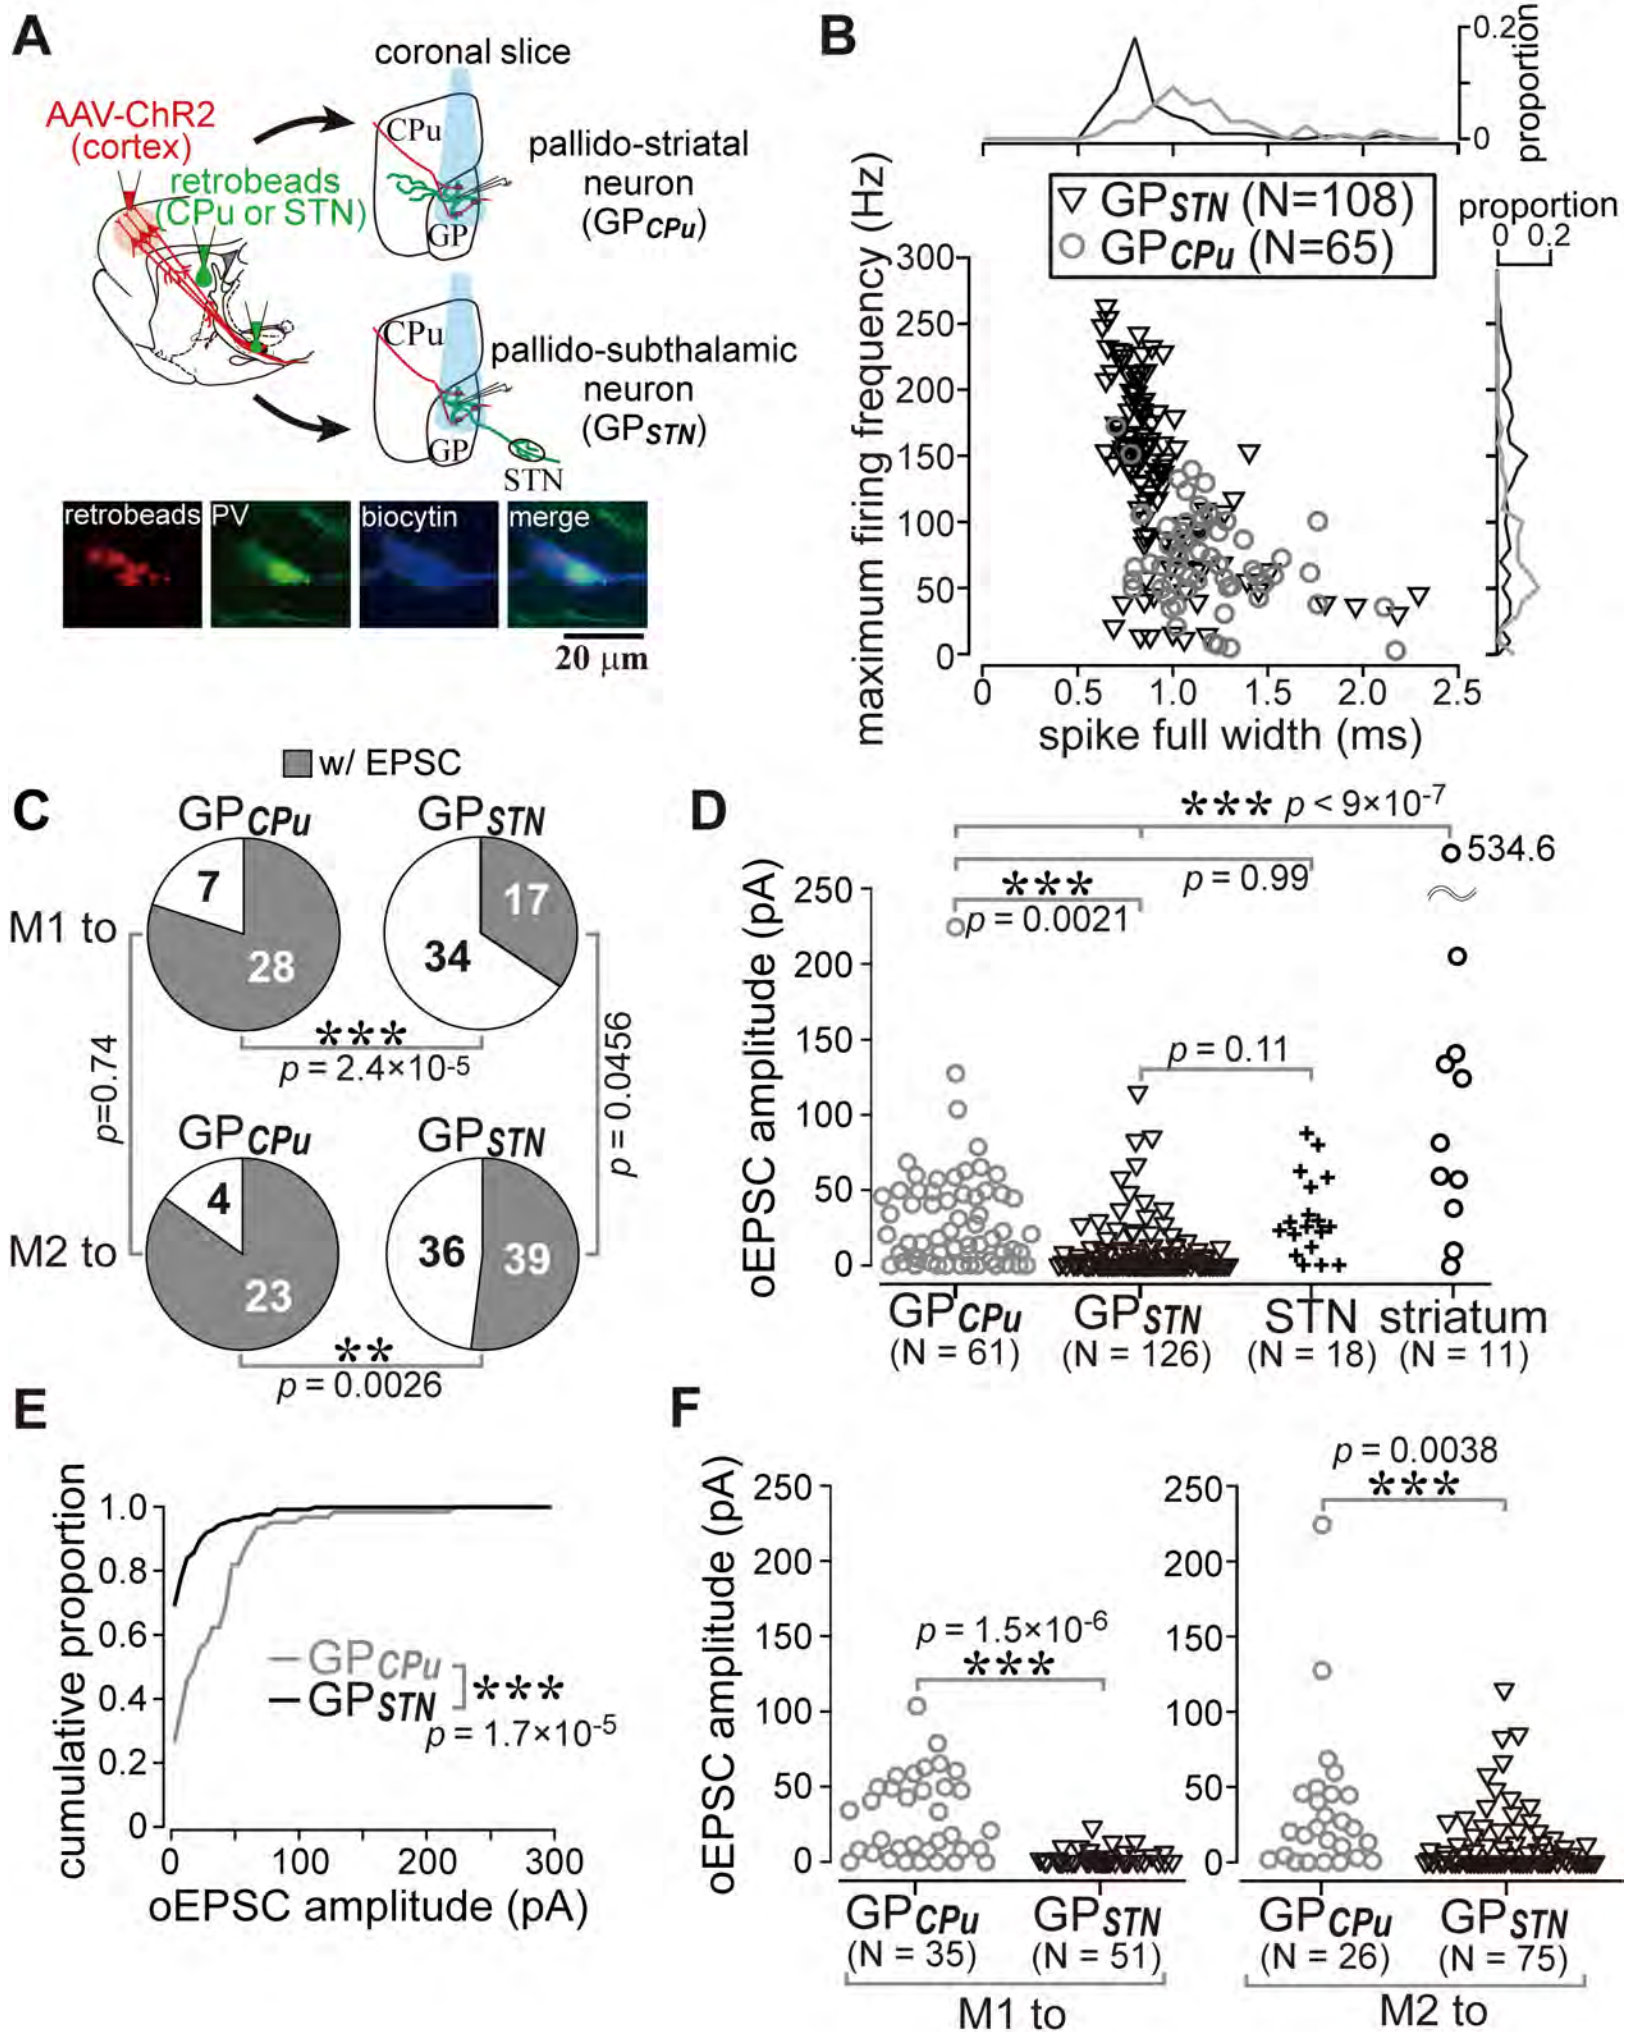

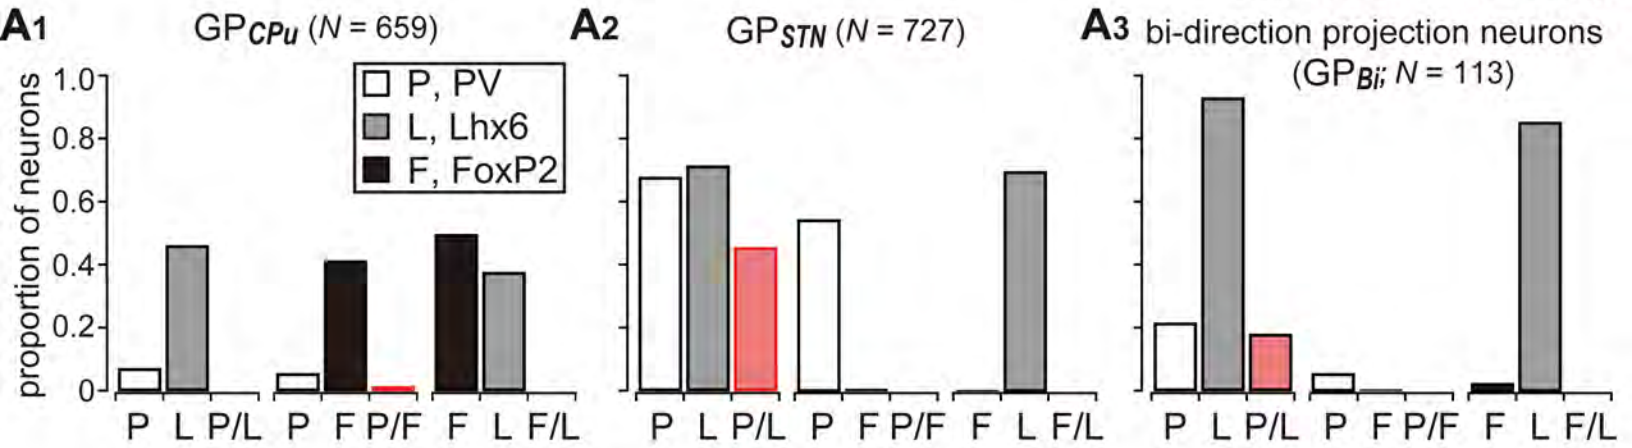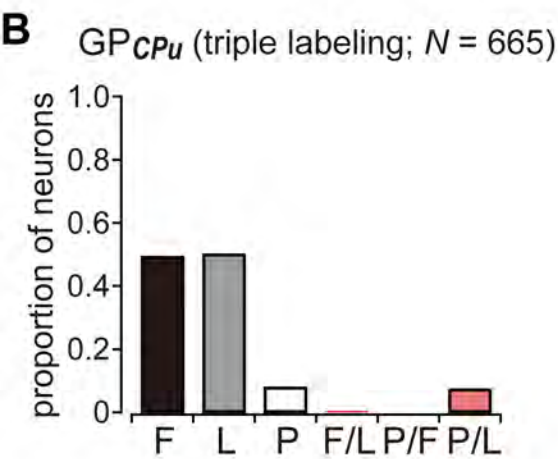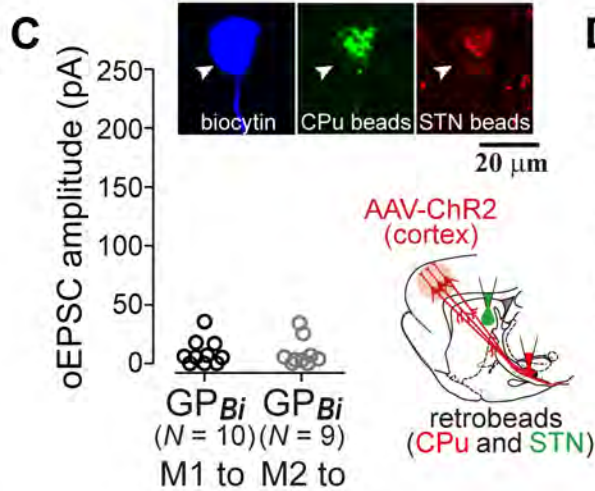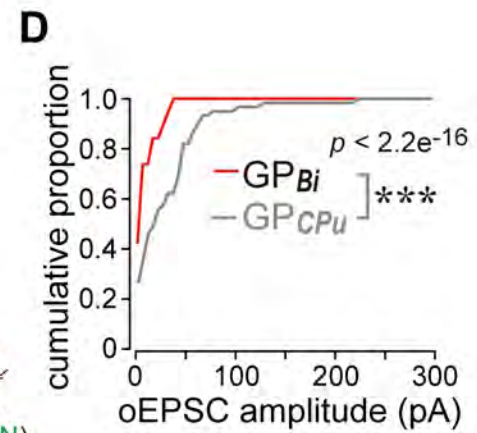

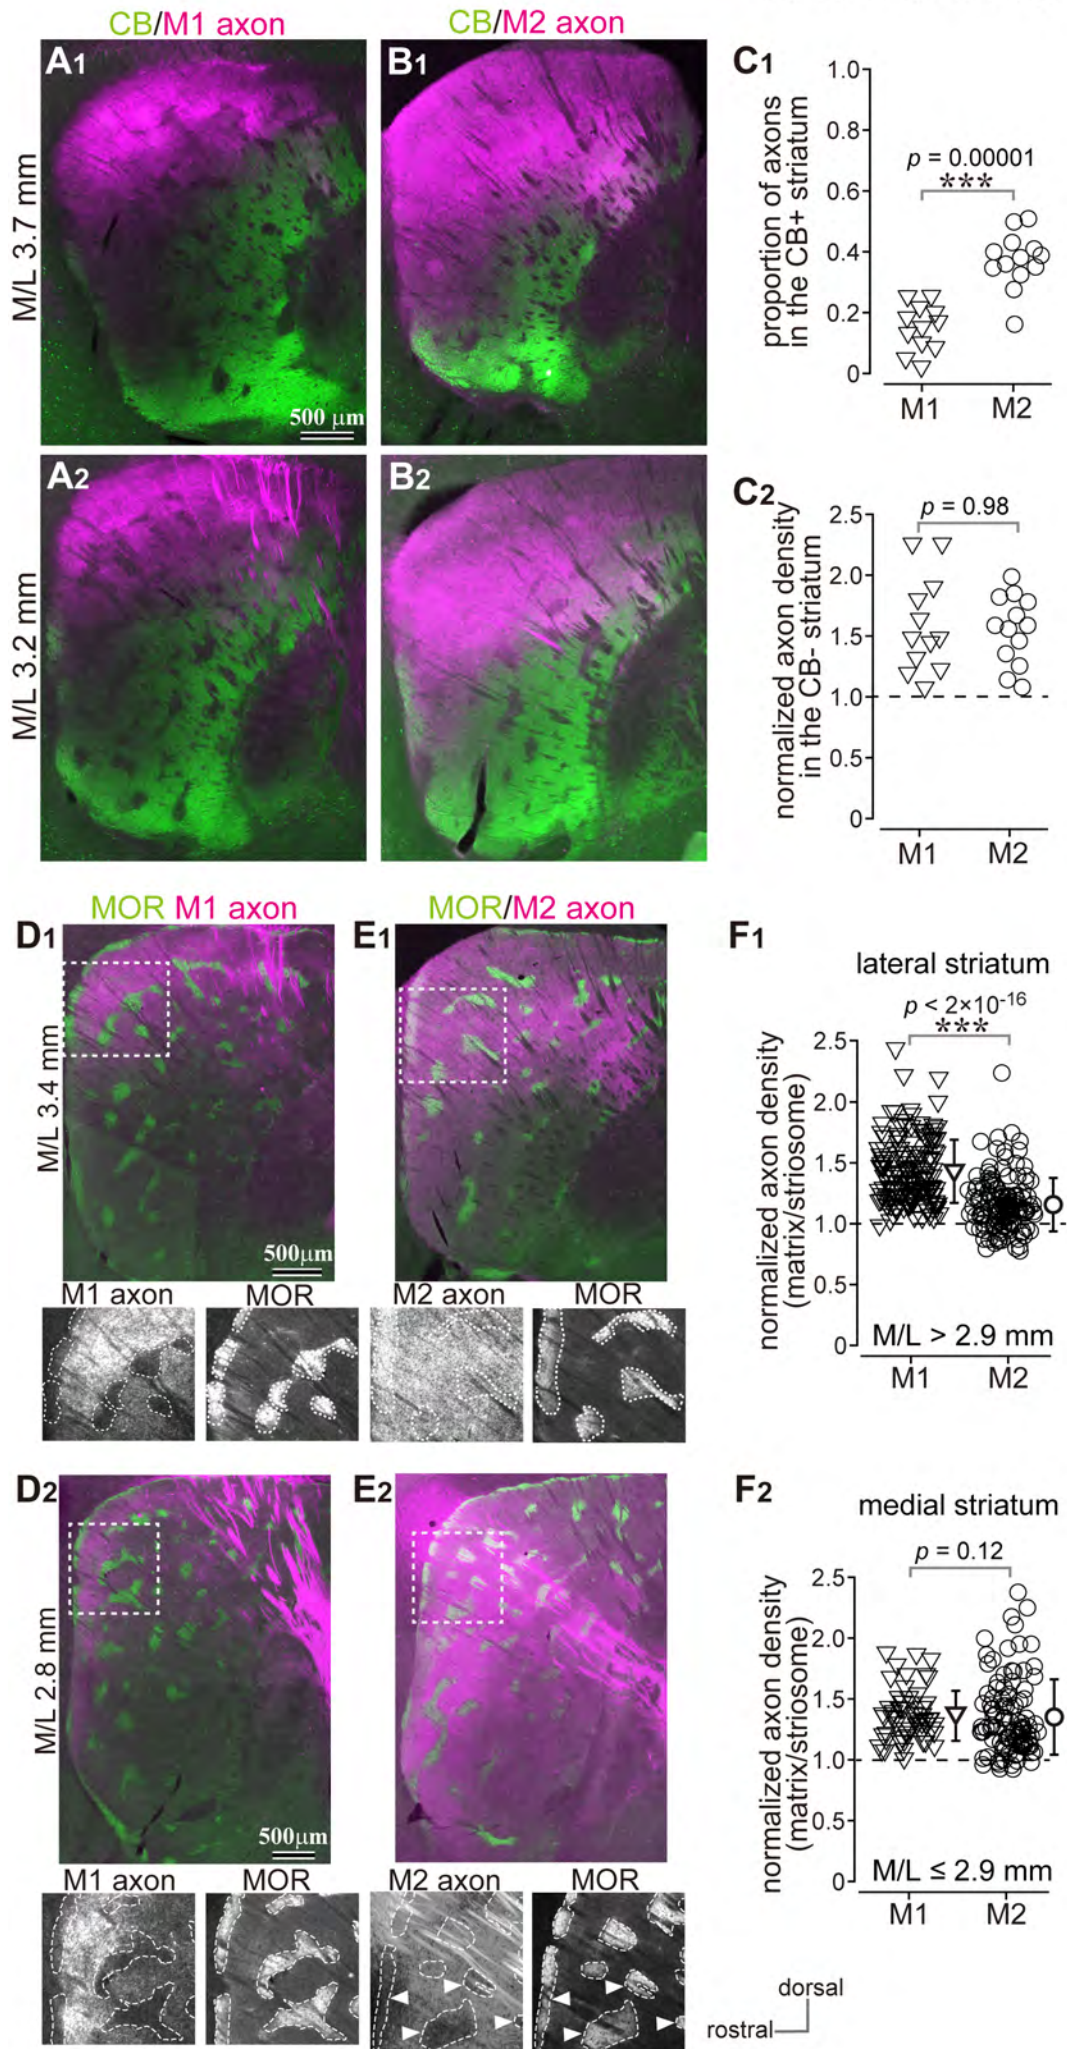

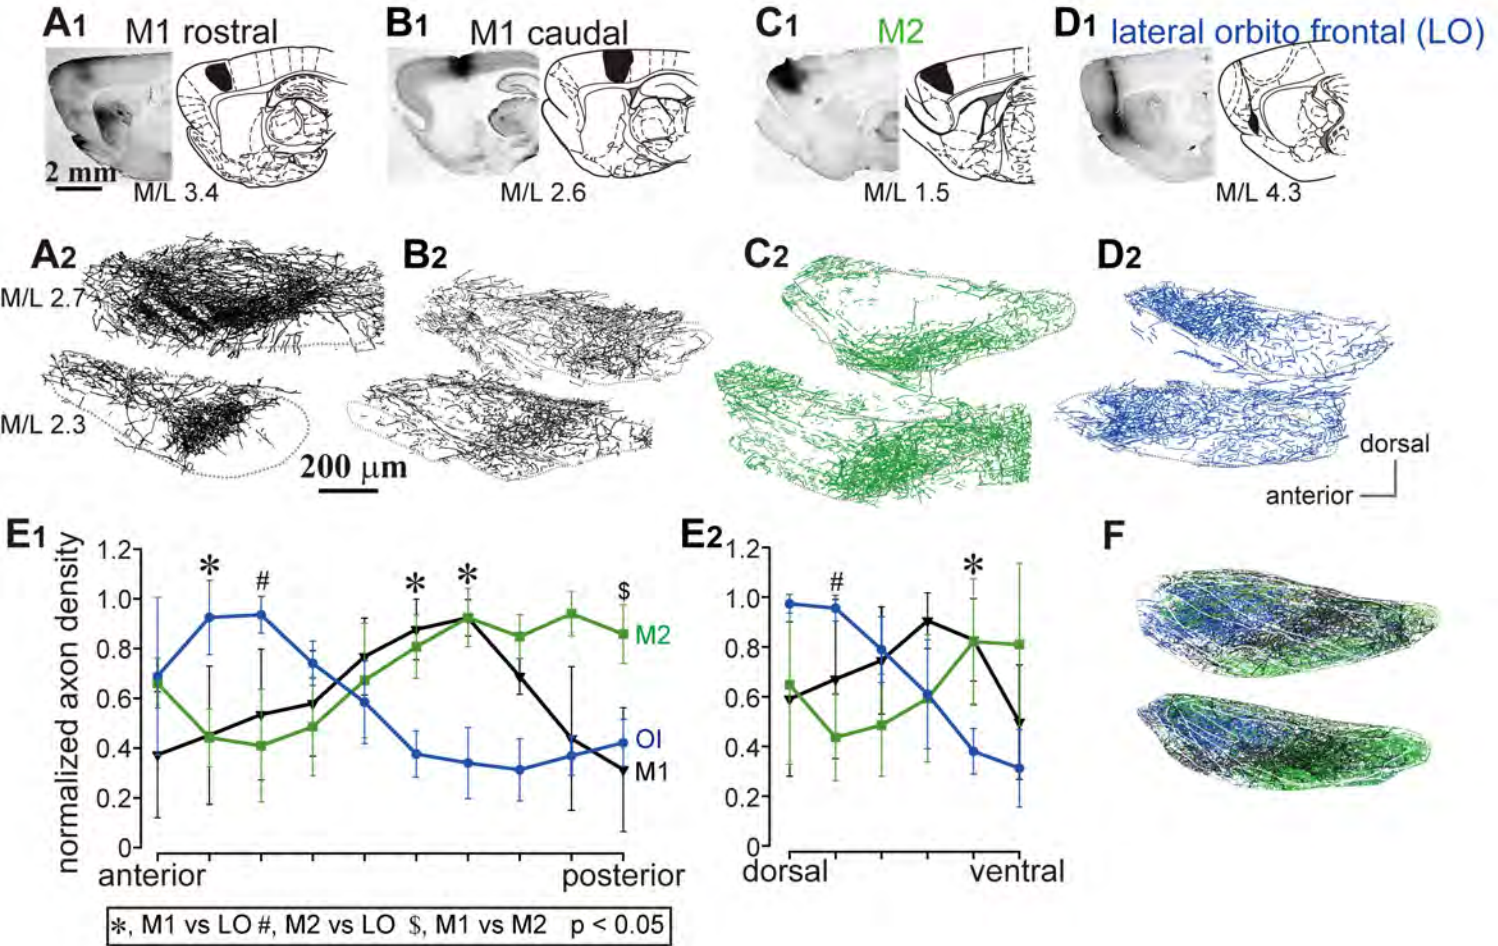

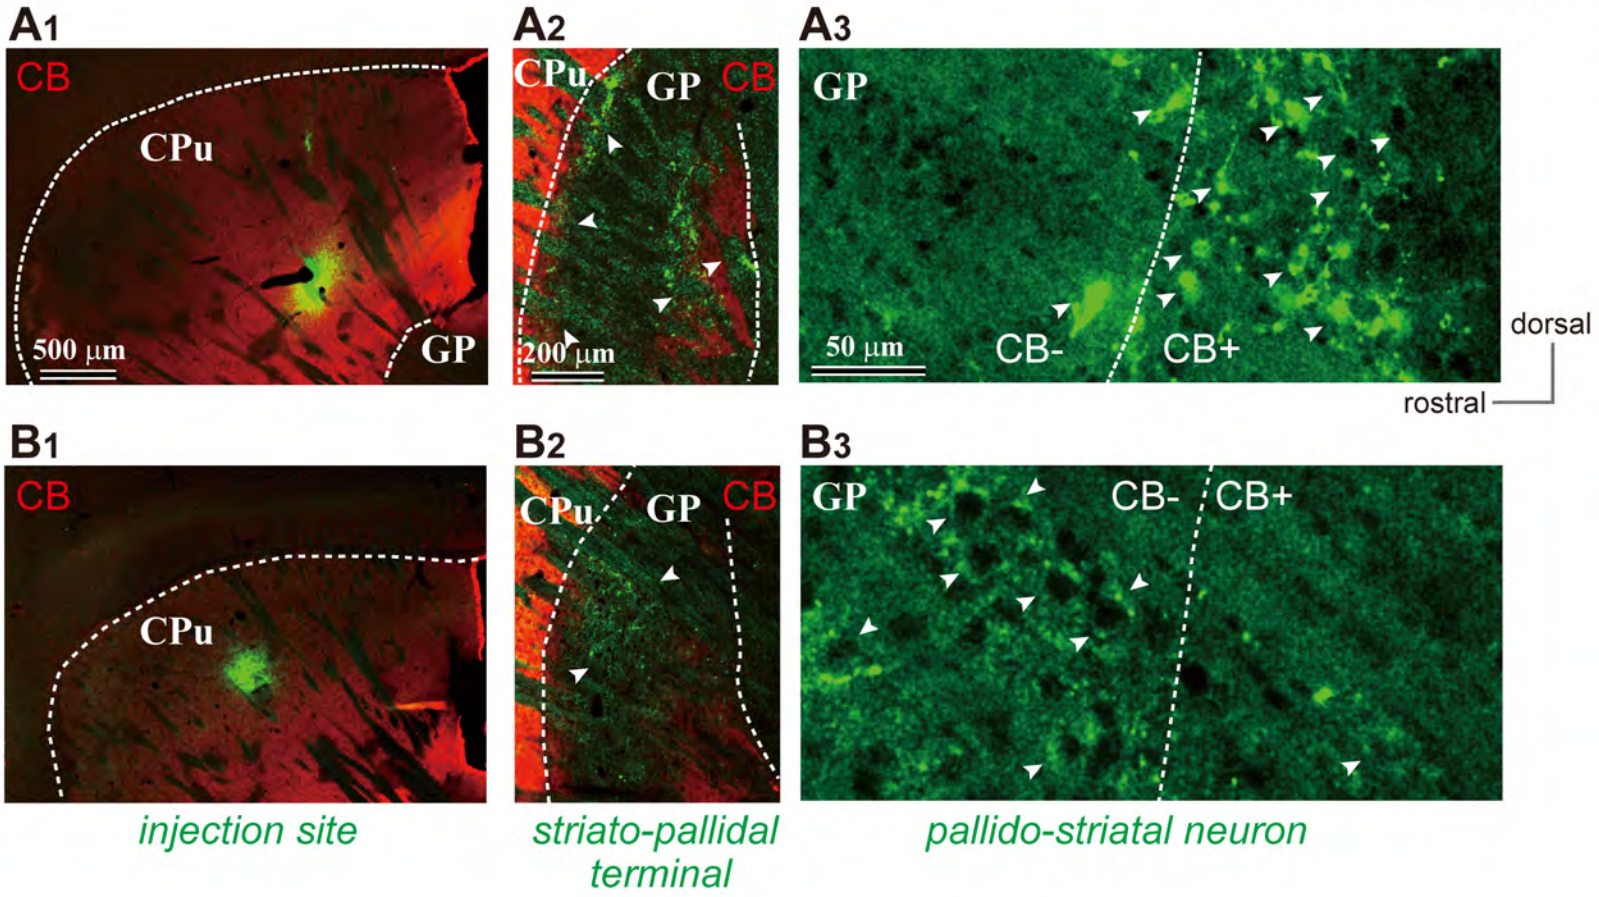



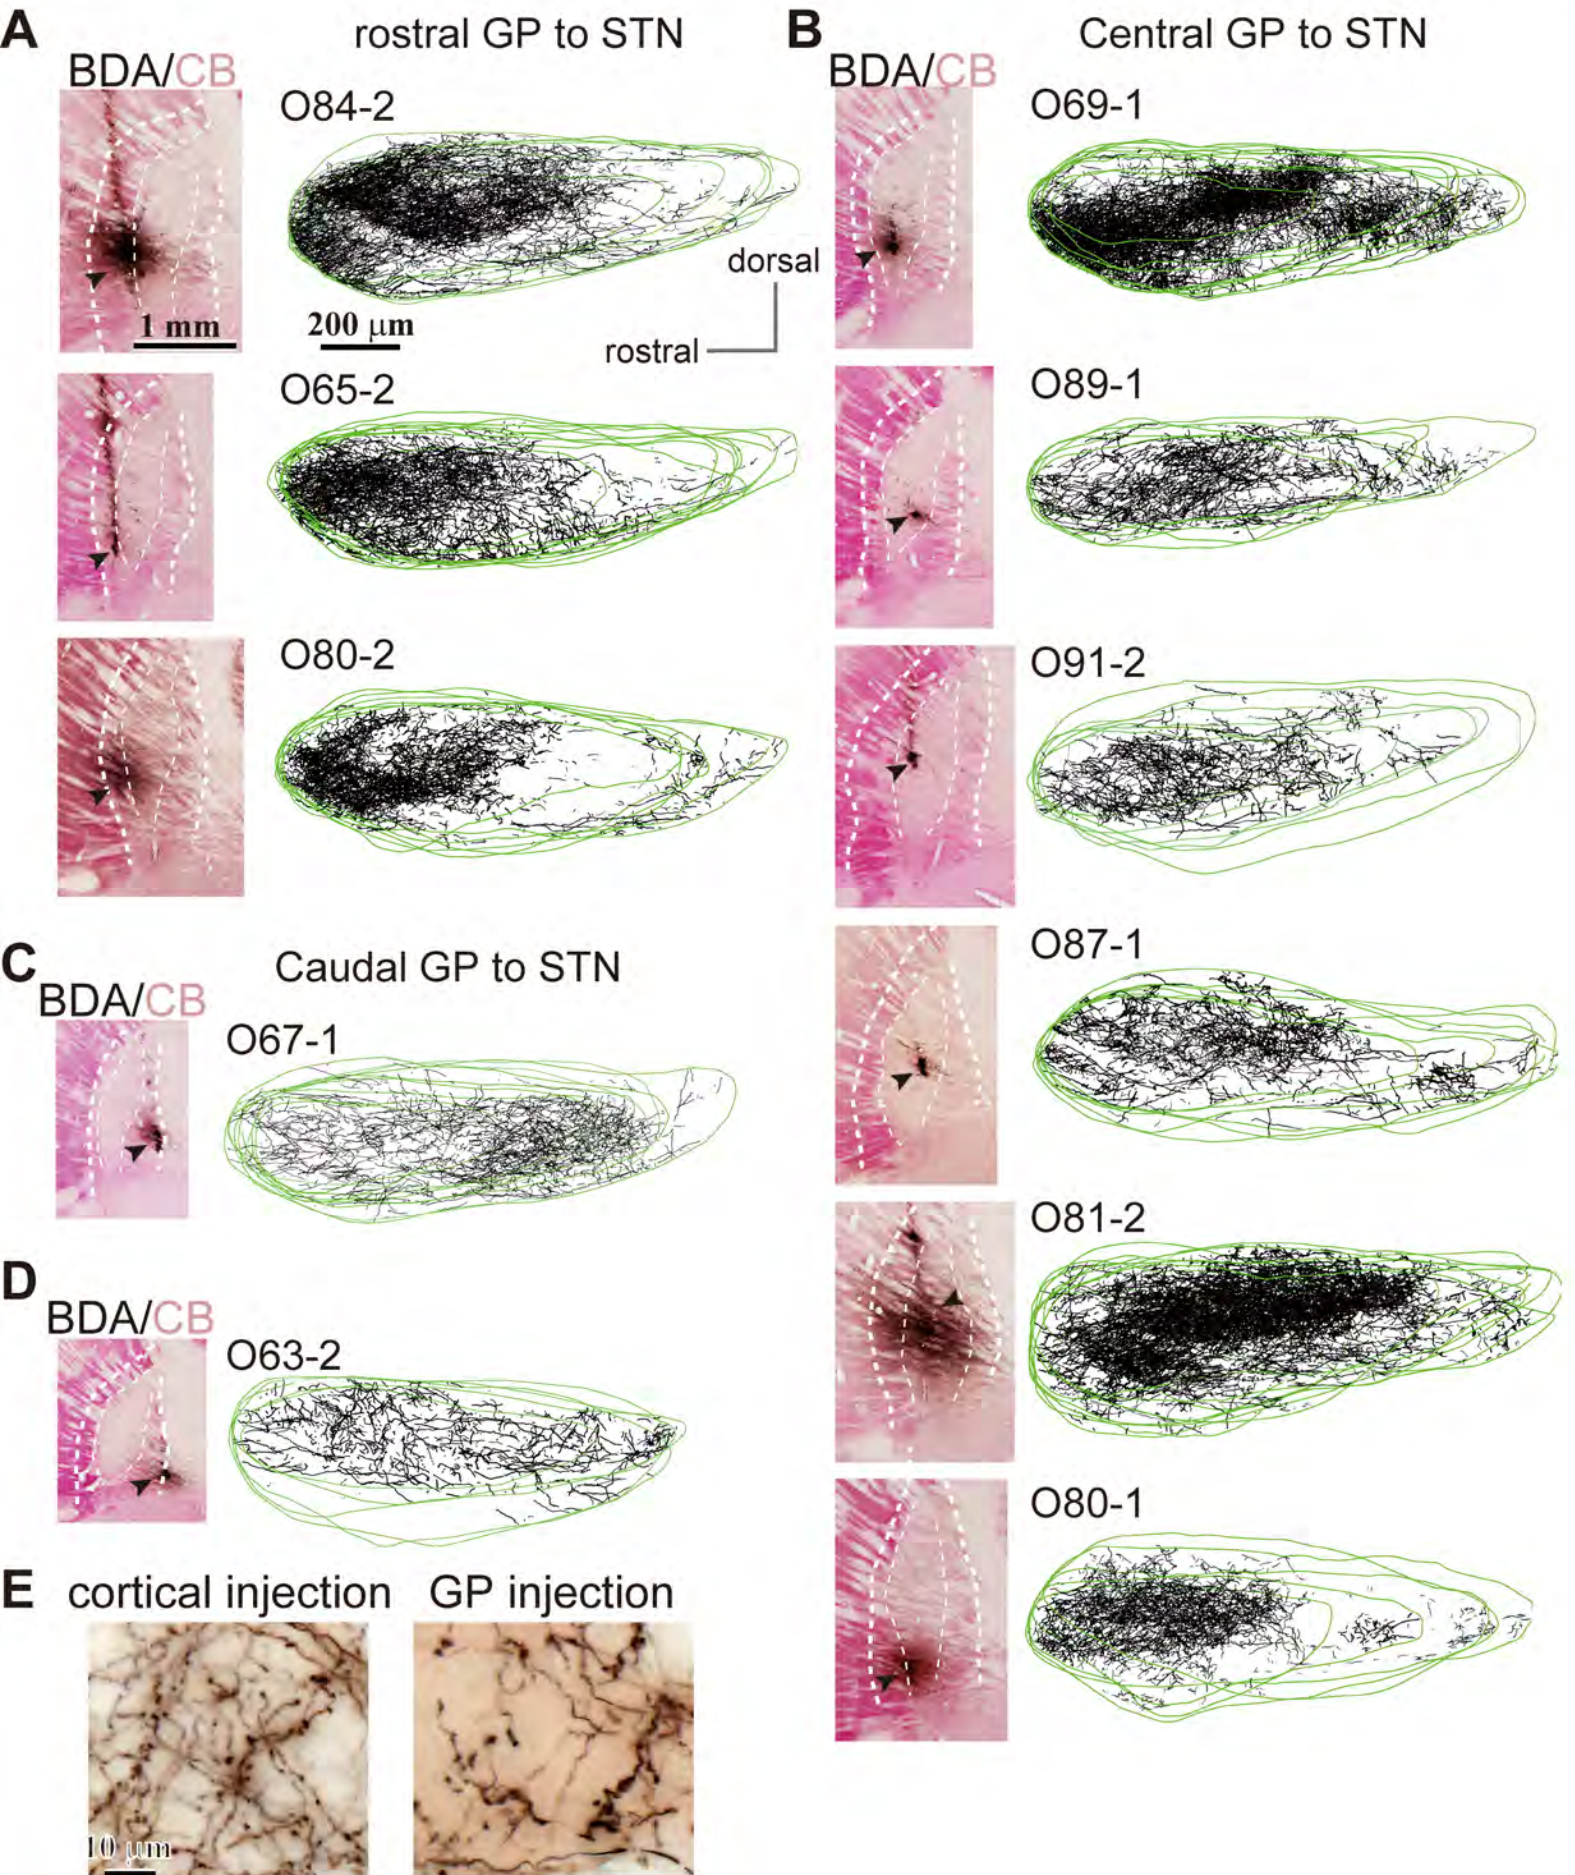

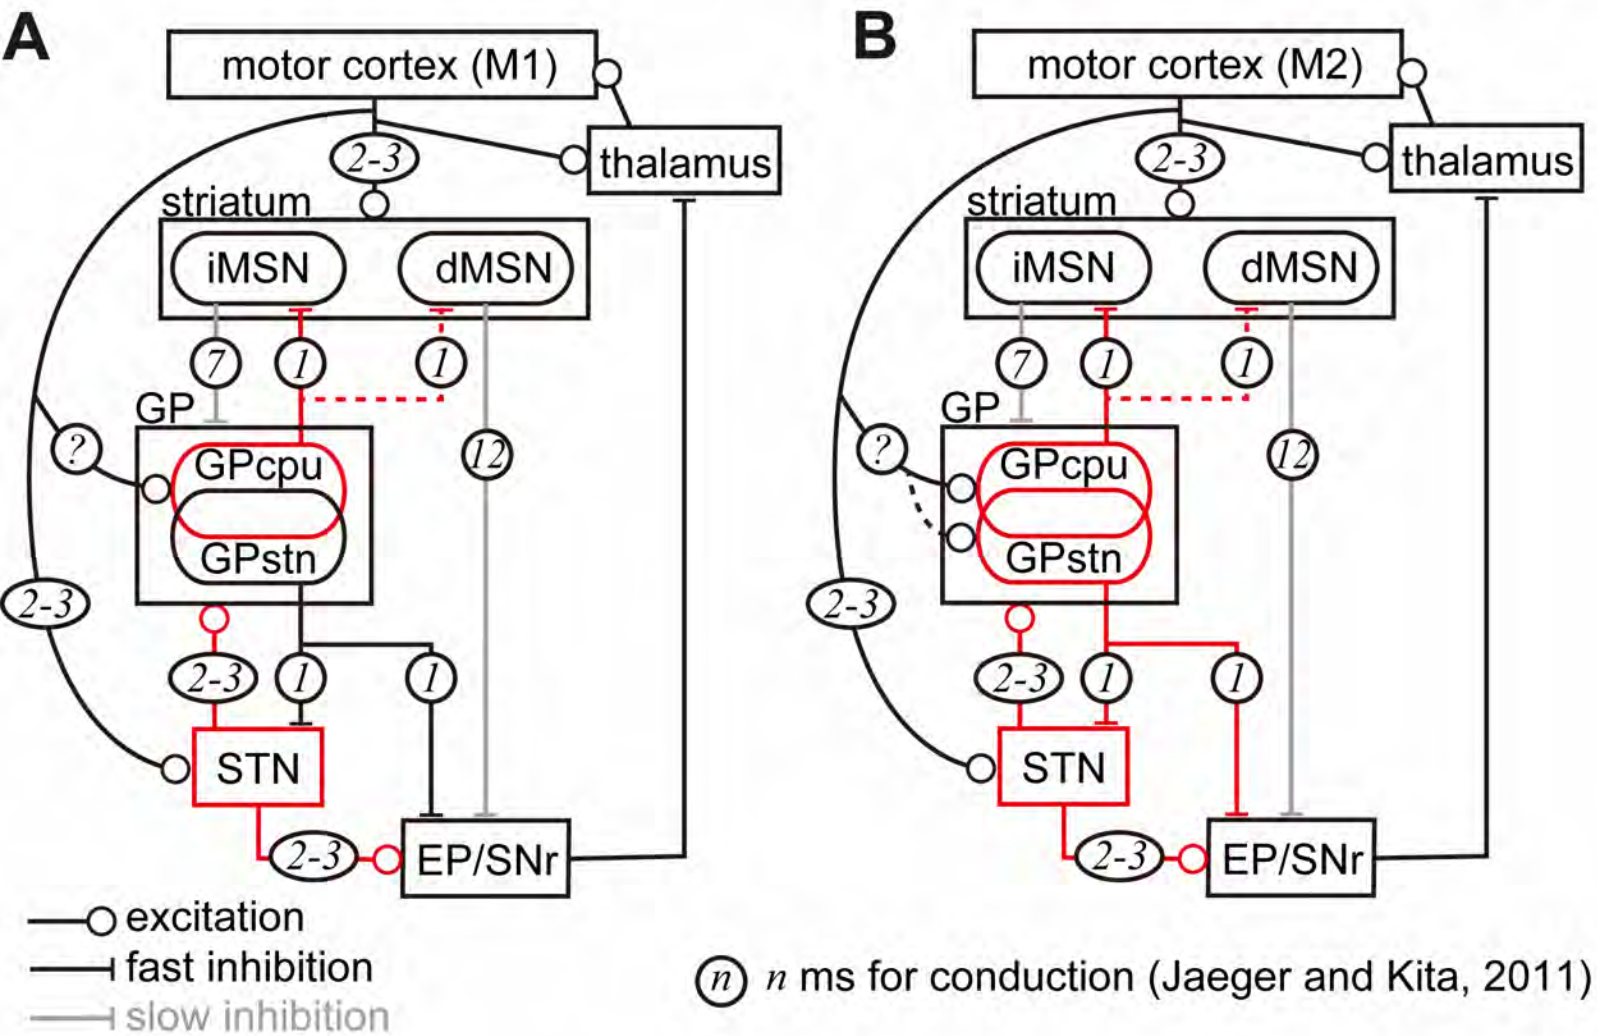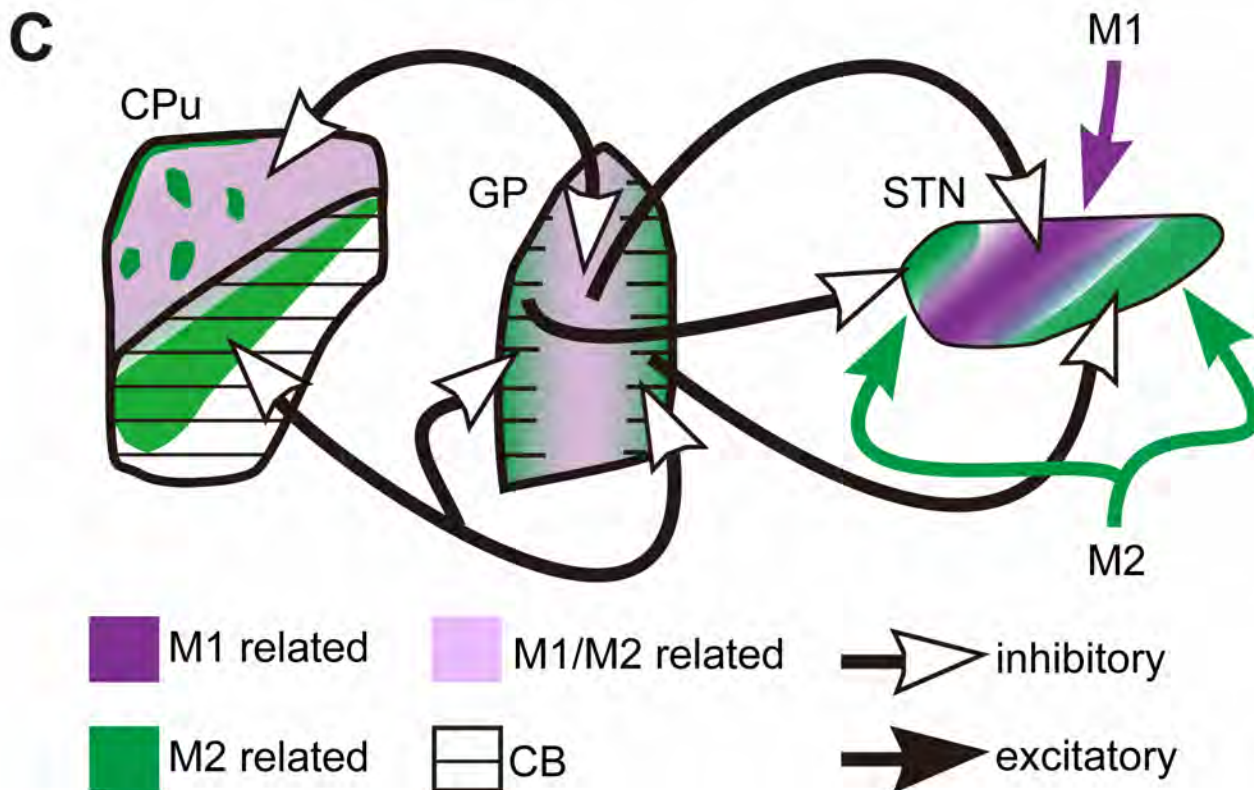

M/L 1.6 mm

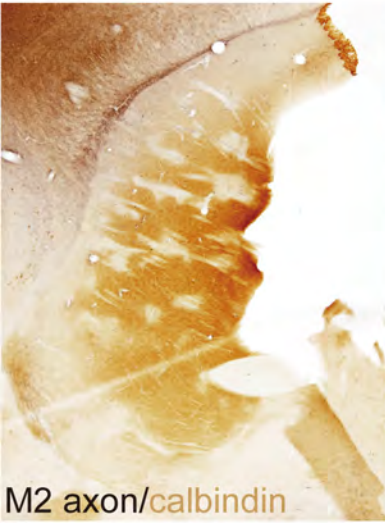

M/L 1.9 mm

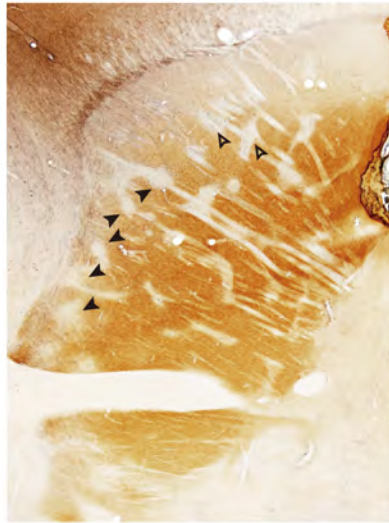

M/L 2.1 mm

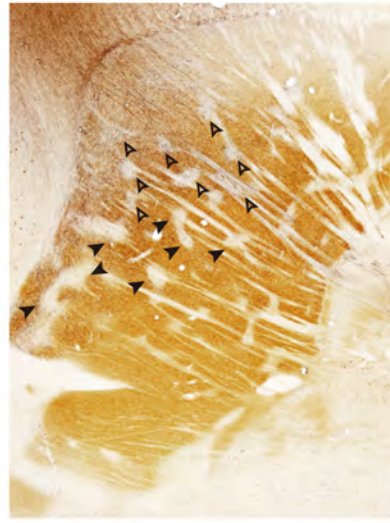

M/L 2.5 mm

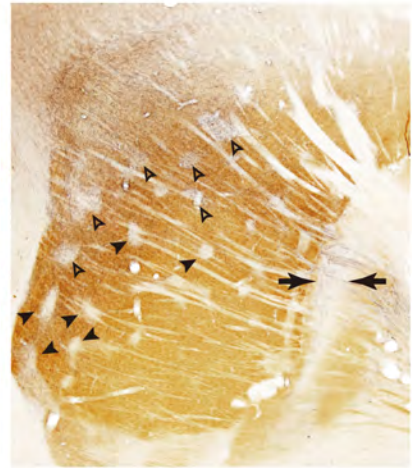

M/L 2.9 mm

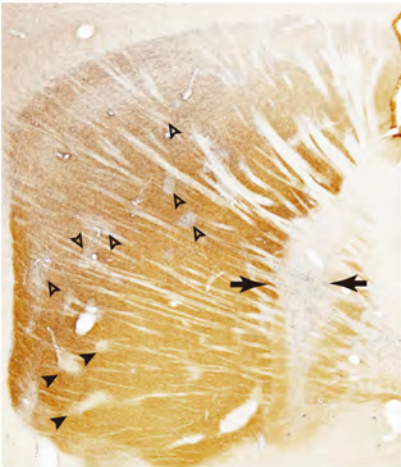

M/L 3.1 mm

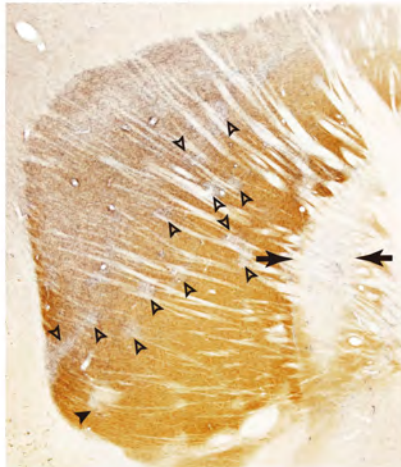

M/L 3.2 mm

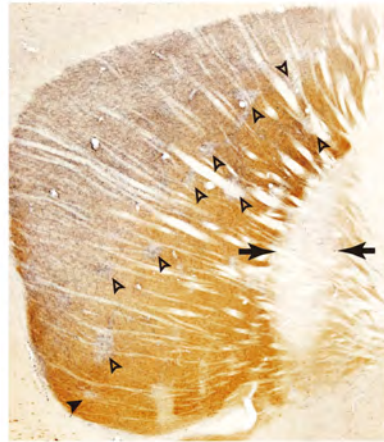

M/L 3.6 mm

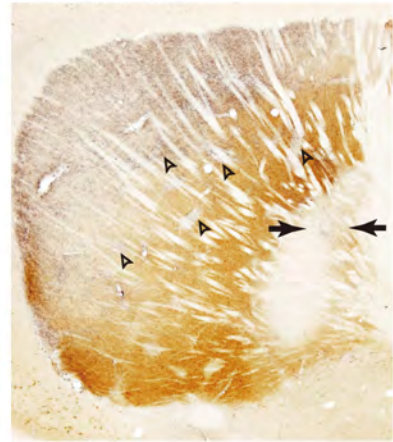

M/L 3.9 mm

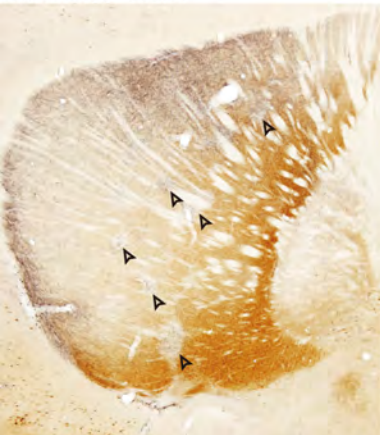

M/L 4.3 mm

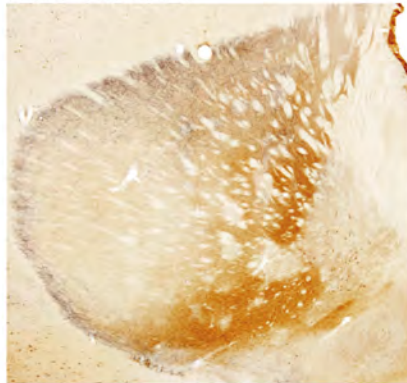

M/L 4.6 mm

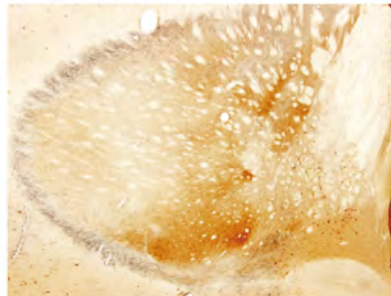

M/L 4.8 mm

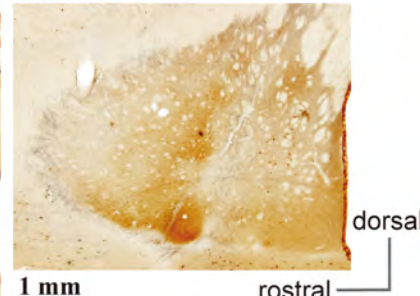

ipsilateral hemisphere

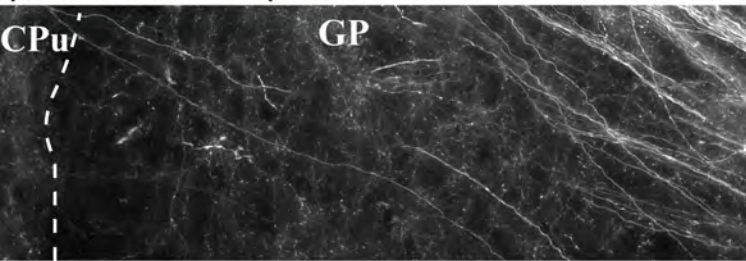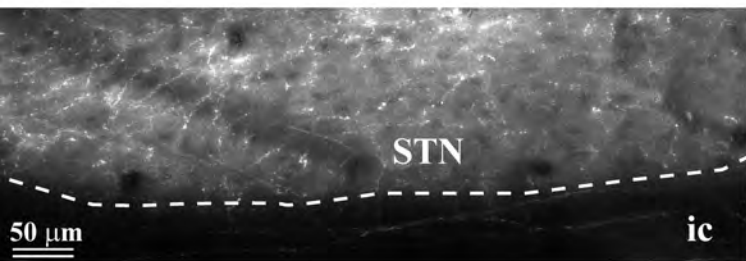

contralateral hemisphere

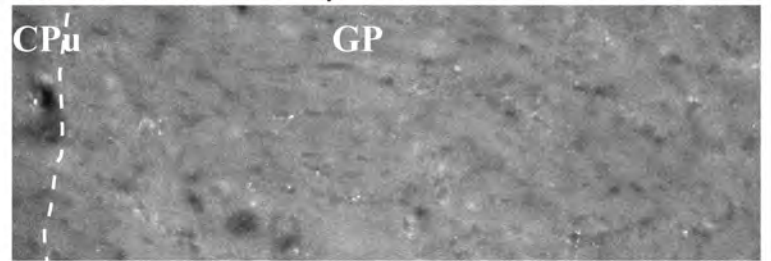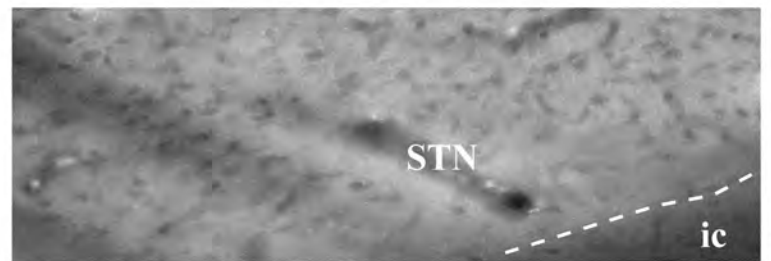

dorsal  
rostral

A small L-shaped bracket indicates the orientation: dorsal is up and rostral is left.

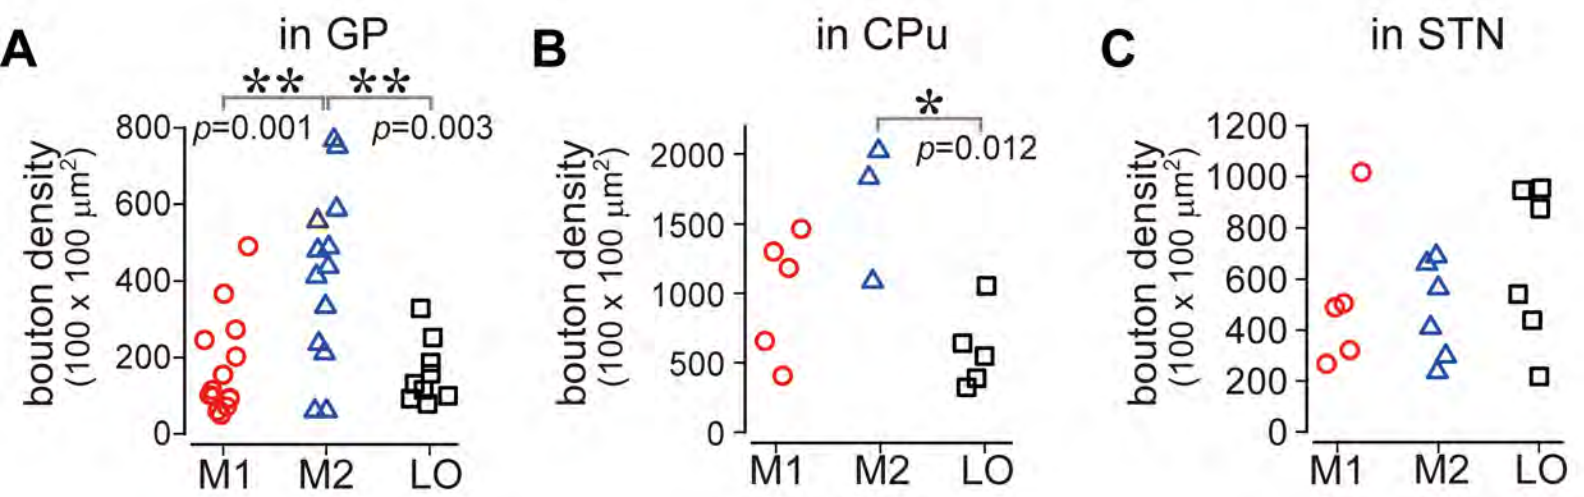

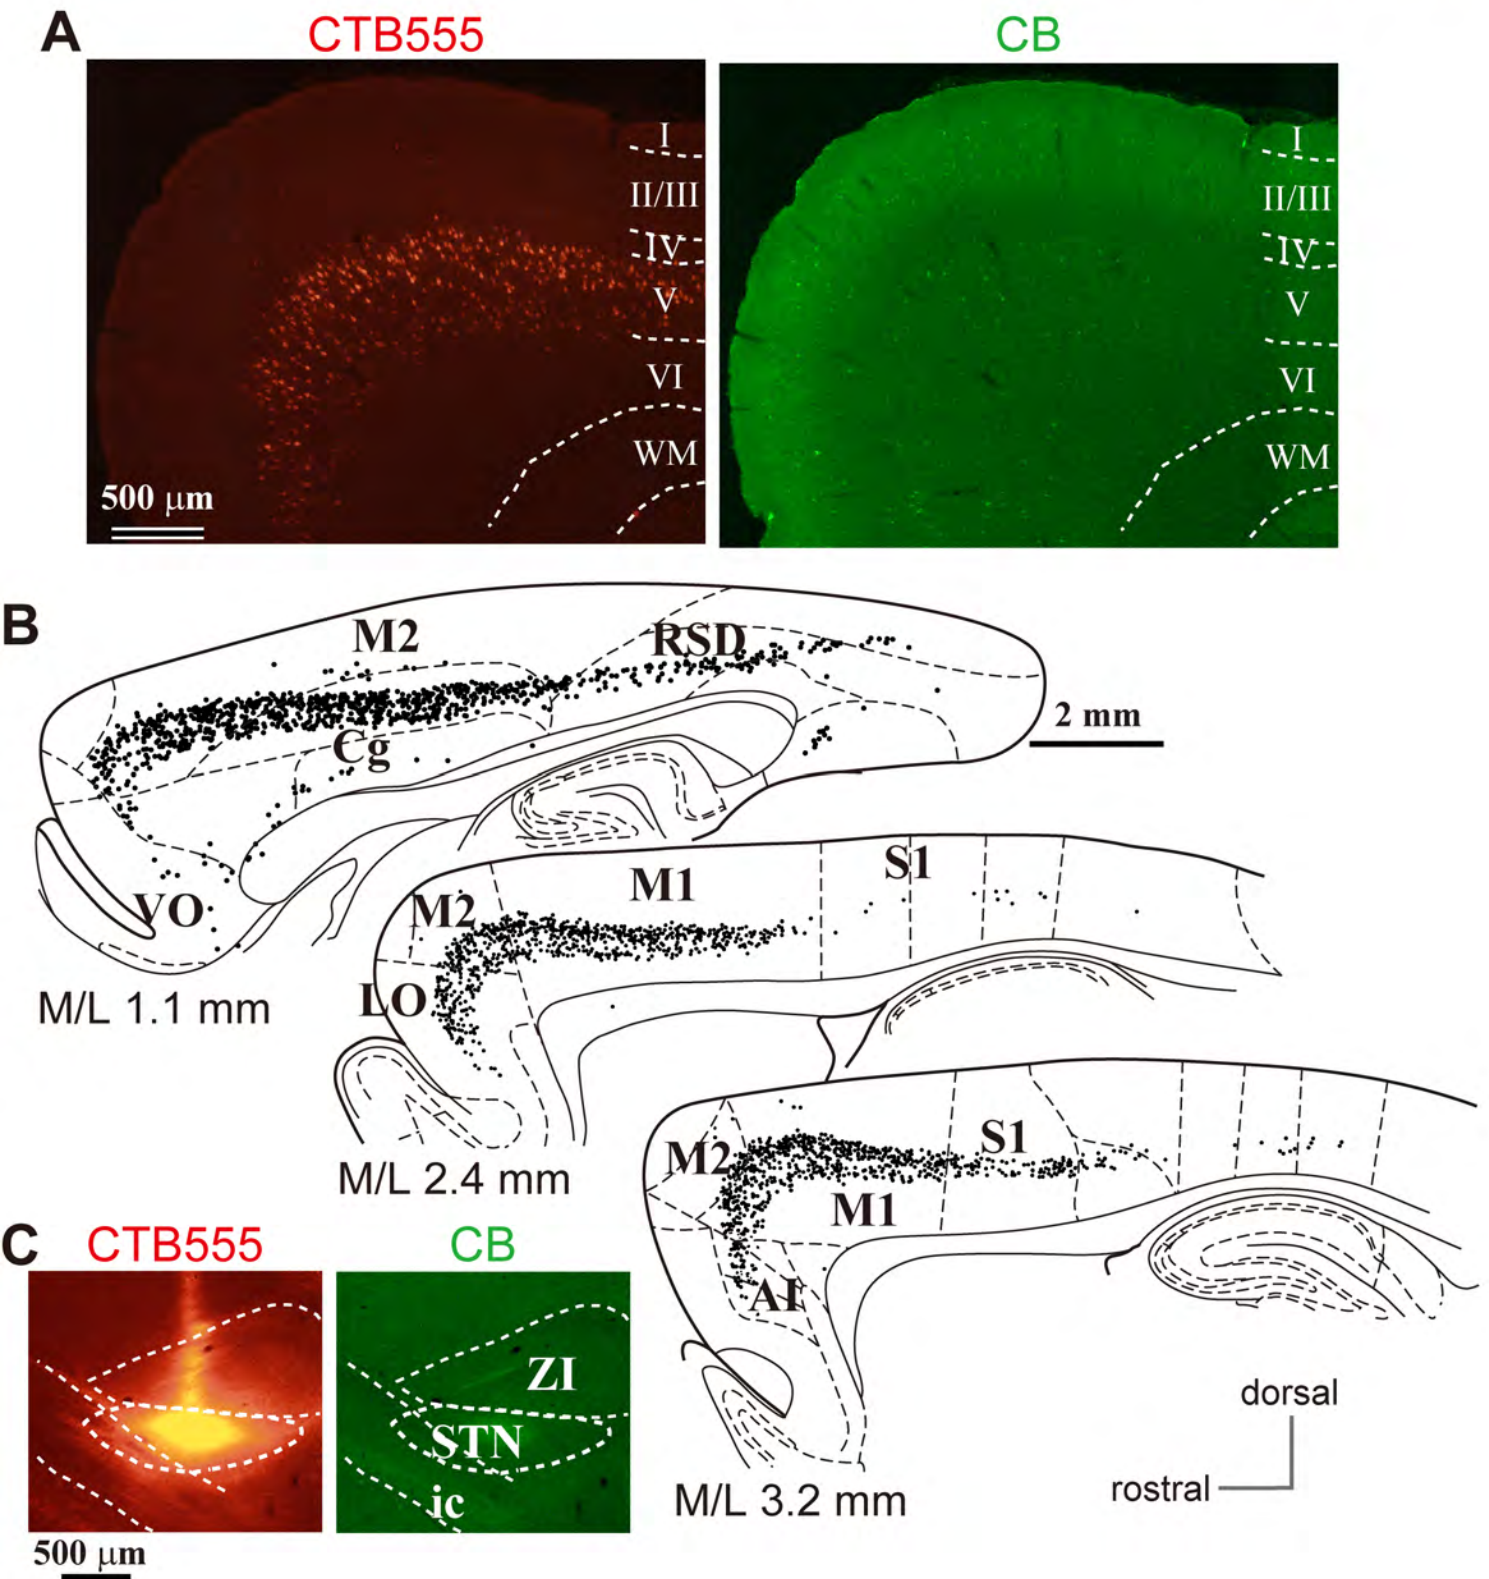

## 1 **Supplementary materials**

2 Orbitofrontal cortex (OFC) and anterior cingulate cortex (Cg) are involved in action  
3 (Schoenbaum et al., 2009). OFC provides behavioral flexibility via response inhibition  
4 and associative learning (but see previous reference). The OFC requires integration of  
5 sensory signals and internal states such as motivation with ongoing action selection and  
6 prediction of reward, to compute causal relationships between action selection and  
7 specific outcomes (Passingham & Wise, 2012). The Cg includes the rostral cingulate  
8 motor area (CMAr) (Morecraft & Van Hoesen, 1998), which lies in the cingulate sulcus,  
9 ventral to the presupplementary motor area, and in primates sends axonal projections to  
10 the spinal cord (Luppino, Matelli, Camarda, & Rizzolatti, 1994). The Cg and  
11 supplementary motor area (SMA) provide internal guides for action (Thaler, Chen, Nixon,  
12 Stern, & Passingham, 1995) correlated with motivation and voluntary behavior. The  
13 caudal cingulate motor area (CMAc), however, is preponderantly implicated in sensory-  
14 driven movement (Paus, 2001) and is thus related to action selection. Similarly to the  
15 OFC, the CMA promotes the switching of actions in response to changes in circumstances  
16 and internal desires (Amemori & Graybiel, 2012; Nakayama et al., 2015; Tanji, 1987),  
17 and is related to preparatory processes (Risterucci, Terramorsi, Nieoullon, & Amalric,  
18 2003). CMAr projects to the M1, SMA, preSMA, premotor cortex, and brainstem,

19 including the pons and spinal cord (Sessle & Wiesendanger, 1982). The OFC and Cg have  
20 different cognitive functions in primates and rodents (Bissonette et al., 2008; Bissonette  
21 et al., 2013; Bissonette & Roesch, 2015; Friedman et al., 2015; Nakayama et al., 2015;  
22 Sul et al., 2010). Thus, the OFC and Cg are important for motor behavior as well as being  
23 motor areas, and we therefore investigated axon projections to the basal ganglia from  
24 lateral orbitofrontal cortex (LO) and rostral Cg.

25

## 26 **Supplementary results**

### 27 *Cortico-striatal and cortico-pallidal projections from LO and anterior cingulate cortex* 28 *(Cg)*

29 For comparison, we investigated axons from LO and Cg, which are also located in the rat  
30 frontal cortex LO axons were distributed in the medio-ventral part of the striatum,  
31 whereas Cg axons were distributed in the medial striatum (Suppl Fig. 1, 2). LO axons  
32 were sparse in the dorsal striatum but dense in the caudal and ventral part of the dorsal  
33 striatum as well as in the nucleus accumbens. In addition, these axons preferentially  
34 innervated the striosomes (Suppl. Fig. 1, arrowheads). In contrast, Cg axons mainly  
35 projected to the dorsomedial striatum with preference for the CB(+) subregions, namely  
36 the matrix (Suppl. Fig. 2). To a degree, the spatial distribution of Cg axons was similar to



37 that of M2 axons; however, Cg axons did not preferentially project to the striosomes  
38 (Suppl. Fig. 2) (Averbeck, Lehman, Jacobson, & Haber, 2014; Friedman et al., 2015;  
39 Gabbott et al., 2005; Hintiryan et al., 2016).

40 LO axons also passed through the GP, but they branched less frequently, and axon  
41 collaterals were apparently not abundant (Suppl. Fig. 1). Actually, motor areas (both M1  
42 and M2) provided more boutons than did LO, as expected based on the axon distribution.  
43 LO did not preferentially innervate the dorsal striatum or GP but preferred the nucleus  
44 accumbens, ventral pallidum, hypothalamus, and extended amygdala (Gabbott et al.,  
45 2005). LO projections to GP were not as dense as those to STN (Suppl. Fig. 1D1). The  
46 LO bouton density in the GP was approximately 30% of that in the striatum (Suppl. Fig.  
47 1 D2). In contrast, the Cg projected to the medial GP and issued as many axon collaterals  
48 as did motor cortical areas (Suppl. Fig. 2).

49

## 50 **Supplementary Figure legends**

### 51 **Supplementary Fig. 1.** LO projections to the basal ganglia

52 (A) LO projections to the striatum. (A1) AAV injections into the LO. (A2) A  
53 representative LO projection to the striatum. LO axons (red) are distributed in the caudal  
54 and ventral part of the dorsal striatum (M/L 2.6 mm). (A3) Immunofluorescence for  $\mu$ -

55 opioid receptor (MOR, green). Arrowheads indicate the striosomes, which are MOR(+),  
56 innervated by the LO axons seen in A2 and A3. Dotted square areas in A2 and A3 are  
57 magnified in the right-most column. (B) BDA injection into LO. (C) Brightfield images  
58 of LO axons in GP, striatum (CPu), and STN. Note that axon and terminal densities in GP  
59 were apparently lower than those in the striatum or STN. (E) Quantitative comparison of  
60 axon density in the GP normalized with that in the STN (D1) and striatum (D2). See also  
61 Fig. 1.

62

63 **Supplementary Fig. 2.** Cingulate cortex (Cg) projections to the basal ganglia

64 (A) Cg projections to the striatum (CPu) in sagittal sections (M/L 2.10 mm). Cg axons  
65 are dense in the CB-negative subregions of the striatum. As in the case of M2 axons, Cg  
66 axons were less dense in the CB-negative striosomes. (B) Cg projections to the GP. Cg  
67 axon collaterals were dense in the CB(-) central GP. Thick axon bundles pass through the  
68 dorsal side of the medial GP (M/L 2.4 mm). (C) Cg projections to the STN. Cg axons are  
69 localized in the caudal part of the medial STN (arrowheads; M/L 2.4 mm).

70

71 **Suppl. Table 1.** Primary antibodies used in this study

| Antigen     | Host<br>species | Supplier              | Catalog number    | RRID        | Working<br>dilution |
|-------------|-----------------|-----------------------|-------------------|-------------|---------------------|
| Calbindin   | mouse           | Sigma                 | C9848             | AB_476894   | 1:4000              |
| Calbindin   | rabbit          | Frontier<br>Institute | calbindin-Rb-Se-1 | AB_2571568  | 1:2000              |
| FoxP2       | rabbit          | Abcam                 | ab16046           | AB_2107107  | 1:2000              |
| Lhx 6       | mouse           | Santacruz             | sc-271433         | AB_10649856 | 1:1000              |
| MOR         | guinea<br>pig   | Millipore             | AB1774            | AB_91022    | 1:5000              |
| MOR         | rabbit          | Neuromics             | RA10104           | AB_2156525  | 1:1000              |
| PHA-L       | goat            | Vector                | AS2224            | AB_2315141  | 1:2000              |
| Parvalbumin | mouse           | Sigma                 | P3171             | AB_2313693  | 1:4000              |
| Parvalbumin | guinea<br>pig   | Synaptic<br>Systems   | 195004/16         | AB_2156476  | 1:5000              |

72 MOR,  $\mu$ -opioid receptor; PHA-L, *Phaseolus vulgaris* leucoagglutinin

73

74 **Suppl. Table 2.** Secondary antibodies used in this study

| Secondary antibody              | Host species | Supplier | Catalog no. | RRID       | Dilution |
|---------------------------------|--------------|----------|-------------|------------|----------|
| anti-rat Alexa Fluor®488        | donkey       | *        | A21208      | AB_141709  | 1:500    |
| anti-mouse Alexa Fluor®546      | donkey       | *        | A10036      | AB_2534012 | 1:500    |
| anti-mouse Alexa Fluor®635      | goat         | *        | A31575      | AB_2536185 | 1:500    |
| anti-rabbit Alexa Fluor®405     | goat         | *        | A31556      | AB_221605  | 1:500    |
| anti-rabbit Alexa Fluor®635     | goat         | *        | A31577      | AB_2536187 | 1:500    |
| anti-guinea pig Alexa Fluor®405 | goat         | Abcam    | ab175678    | -          | 1:500    |
| anti-guinea pig Alexa Fluor®594 | goat         | *        | A11076      | AB_141930  | 1:500    |

anti-guinea pig Alexa      goat      \*      A21105      AB\_2535757      1:500

Fluor®633

---

75 All antibodies are polyclonal. \* Thermo Fisher Scientific (Waltham, MA), Abcam  
76 (Cambridge, UK)  
77

78 **Supplementary References**

- 79 Amemori, K., & Graybiel, A. M. (2012). Localized microstimulation of primate pregenual  
80 cingulate cortex induces negative decision-making. *Nat Neurosci*, *15*(5), 776-785.  
81 doi:10.1038/nn.3088
- 82 Averbeck, B. B., Lehman, J., Jacobson, M., & Haber, S. N. (2014). Estimates of projection  
83 overlap and zones of convergence within frontal-striatal circuits. *J Neurosci*, *34*(29),  
84 9497-9505. doi:10.1523/JNEUROSCI.5806-12.2014
- 85 Bissonette, G. B., Martins, G. J., Franz, T. M., Harper, E. S., Schoenbaum, G., & Powell, E.  
86 M. (2008). Double dissociation of the effects of medial and orbital prefrontal cortical  
87 lesions on attentional and affective shifts in mice. *J Neurosci*, *28*(44), 11124-11130.  
88 doi:10.1523/JNEUROSCI.2820-08.2008
- 89 Bissonette, G. B., & Roesch, M. R. (2015). Rule encoding in dorsal striatum impacts action  
90 selection. *Eur J Neurosci*, *42*(8), 2555-2567. doi:10.1111/ejn.13042
- 91 Luppino, G., Matelli, M., Camarda, R., & Rizzolatti, G. (1994). Corticospinal projections from  
92 mesial frontal and cingulate areas in the monkey. *Neuroreport*, *5*(18), 2545-2548.
- 93 Morecraft, R. J., & Van Hoesen, G. W. (1998). Convergence of limbic input to the cingulate  
94 motor cortex in the rhesus monkey. *Brain Res Bull*, *45*(2), 209-232.
- 95 Risterucci, C., Terramorsi, D., Nieoullon, A., & Amalric, M. (2003). Excitotoxic lesions of the  
96 prelimbic-infralimbic areas of the rodent prefrontal cortex disrupt motor preparatory  
97 processes. *Eur J Neurosci*, *17*(7), 1498-1508. doi:10.1046/j.1460-9568.2003.02541.x
- 98 Sessle, B. J., & Wiesendanger, M. (1982). Structural and functional definition of the motor  
99 cortex in the monkey (*Macaca fascicularis*). *J Physiol*, *323*, 245-265.
- 100 Tanji, J. (1987). Neuronal activity in the primate non-primary cortex is different from that in  
101 the primary motor cortex. In R. Porter (Ed.), *Motor areas of the cerebral cortex*. (pp.  
102 142-150). Chichester: John Wiley and Sons Ltd.
- 103 Thaler, D., Chen, Y. C., Nixon, P. D., Stern, C. E., & Passingham, R. E. (1995). The functions  
104 of the medial premotor cortex. I. Simple learned movements. *Exp Brain Res*, *102*(3),  
105 445-460.
- 106

**A1** LO injection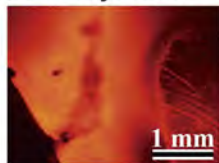

dorsal  
rostral

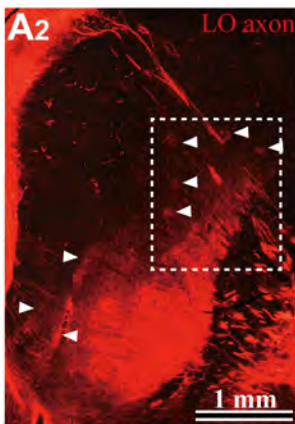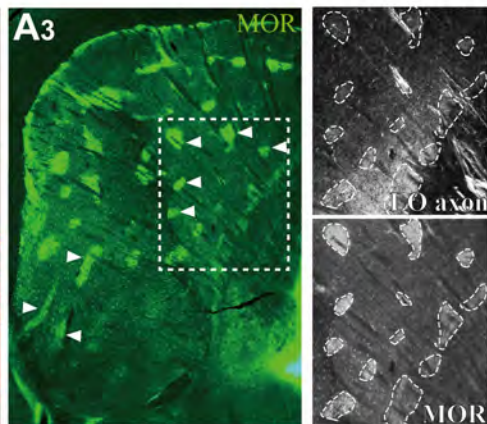**B** LO/insular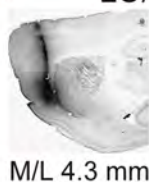

M/L 4.3 mm

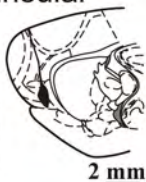

2 mm

**C**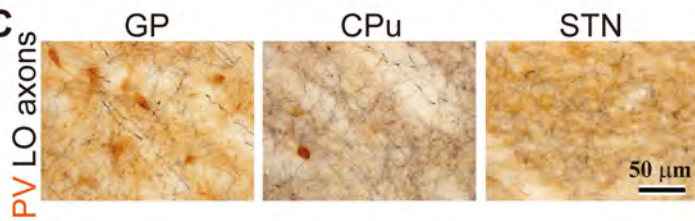**D1**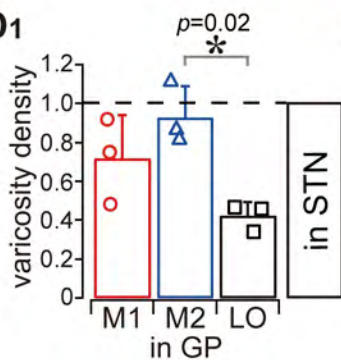**D2**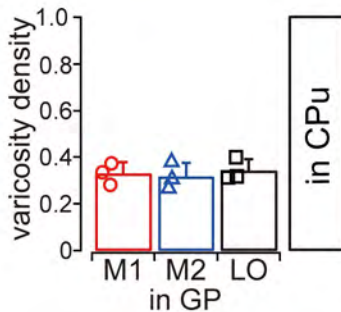

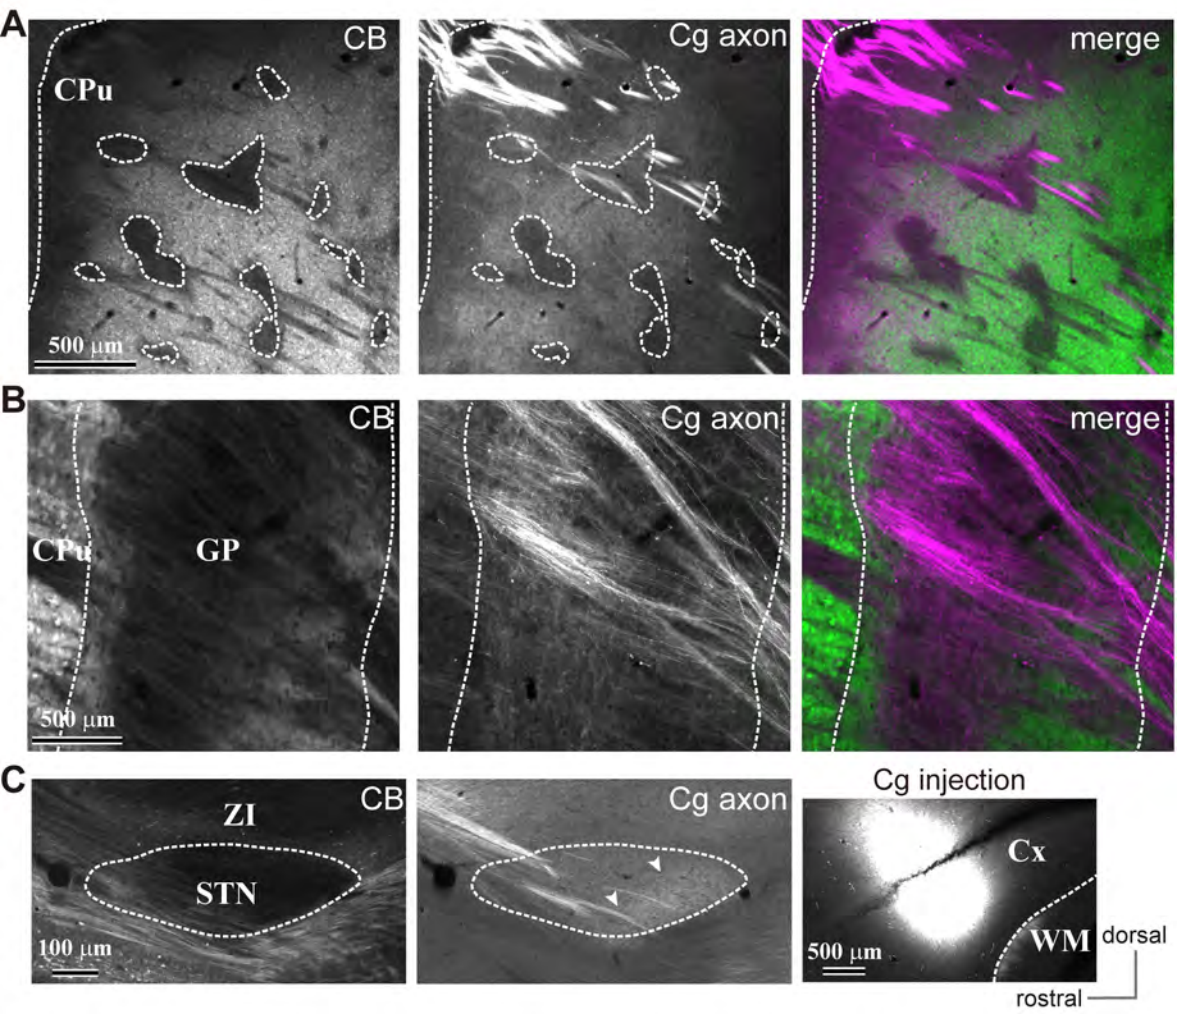

Source: https://www.biorxiv.org/content/10.1101/677377v2.full.pdf
